# Supplementary material for: Going beyond structural effects: explicit solvation influence on the rotational isomerism of C-glycosylated flavonoids
Source: Royal Society of Chemistry journal article supplement (doi:10.1039/d3qo00882g), 2023-01-01
Supplement: d3qo00882g1.pdf [file d3qo00882g1.pdf]

**Supplementary Material**  
ORGANIC CHEMISTRY FRONTIERS

**Going Beyond Structural Effects: Explicit Solvation Influence on the Rotational Isomerism of C-Glycosylated Flavonoids**

Karine N. de Andrade<sup>1,\*</sup>, Lucas H. Martorano<sup>1</sup>, Guilherme S. Correa<sup>1</sup>, Fernando M. dos Santos Jr. <sup>1</sup>, José Walkimar M. Carneiro<sup>2</sup>, Ana Carolina F. de Albuquerque<sup>1</sup>, Anne Caroline C. Gomes<sup>3</sup>, Rodolfo G. Fiorot<sup>1,\*</sup>

<sup>1</sup> Department of Organic Chemistry, Chemistry Institute, Universidade Federal Fluminense (UFF), Outeiro de São João Batista, 24020-141, Niterói, RJ, Brazil

<sup>2</sup> Department of Inorganic Chemistry, Chemistry Institute, Universidade Federal Fluminense (UFF), Outeiro de São João Batista, 24020-141, Niterói, RJ, Brazil.

<sup>3</sup> Instituto Federal de Educação, Ciências e Tecnologia do Rio de Janeiro, Campus Realengo, 21715-000, Brazil.

Corresponding authors: Karine N. de Andrade – karineandrade@id.uff.br and Rodolfo G. Fiorot – rodolfofiorot@id.uff.br

**CONTENTS**

|                                                                   |    |
|-------------------------------------------------------------------|----|
| <b>CONFORMATIONAL ANALYSIS</b> .....                              | 2  |
| <b>ROTATIONAL ISOMERISM</b> .....                                 | 3  |
| Theoretical Rotational Barrier for NMR Signal Duplication .....   | 4  |
| <b>EXPLICIT SOLVATION</b> .....                                   | 5  |
| XTB Pre-optimization.....                                         | 7  |
| <b>MATRICES OF OPTIMIZED STRUCTURES</b> .....                     | 26 |
| Pure Solvation model (IEFPCM).....                                | 26 |
| Hybrid cluster-continuum model (IEFPCM + Explicit Solvation)..... | 73 |

## CONFORMATIONAL ANALYSIS

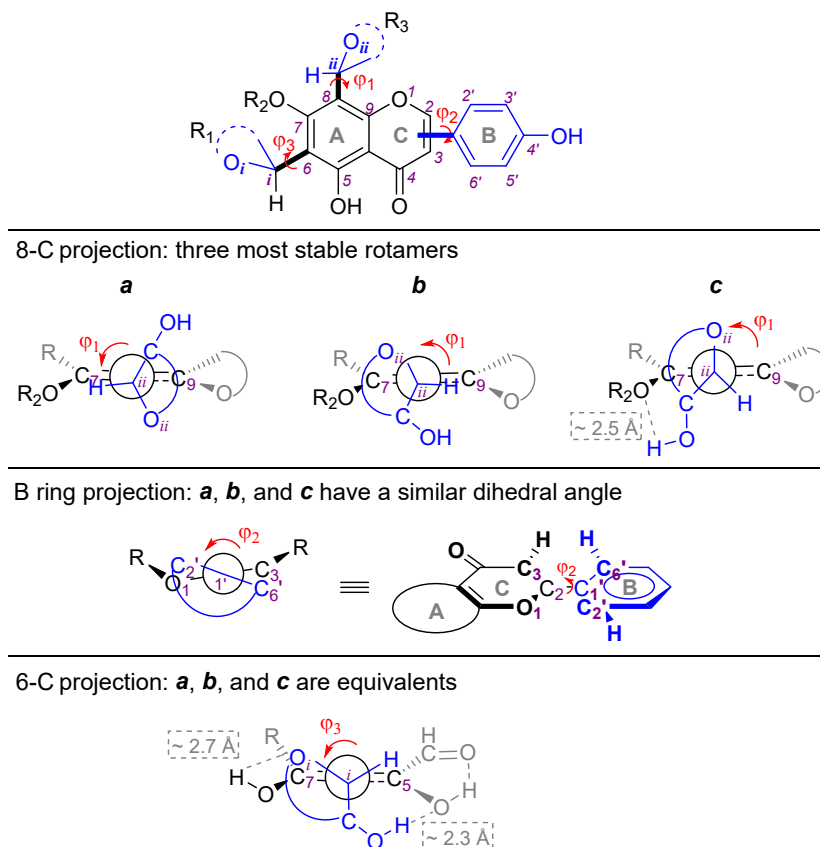

| Flavonoid | Rotamer  | Dihedral angle                                                                   | $\Delta G$         |
|-----------|----------|----------------------------------------------------------------------------------|--------------------|
| <b>1</b>  | <i>a</i> | $\varphi_1 = 120.8^\circ$ ; $\varphi_2 = 20.4^\circ$ ; $\varphi_3 = -35.3^\circ$ | 0.0                |
|           | <i>b</i> | $\varphi_1 = -63.3^\circ$ ; $\varphi_2 = 18.3^\circ$ ; $\varphi_3 = -35.0^\circ$ | 1.2                |
|           | <i>c</i> | $\varphi_1 = -99.9^\circ$ ; $\varphi_2 = 28.2^\circ$ ; $\varphi_3 = -35.3^\circ$ | 2.1                |
| <b>2</b>  | <i>a</i> | $\varphi_1 = 124.9^\circ$ ; $\varphi_2 = 20.1^\circ$ ; $\varphi_3 = -34.4^\circ$ | 0.0                |
|           | <i>b</i> | $\varphi_1 = -62.7^\circ$ ; $\varphi_2 = 16.2^\circ$ ; $\varphi_3 = -33.6^\circ$ | 1.7                |
|           | <i>c</i> | $\varphi_1 = 124.9^\circ$ ; $\varphi_2 = 20.1^\circ$ ; $\varphi_3 = -34.4^\circ$ | 0.0 <sup>[a]</sup> |
| <b>3</b>  | <i>a</i> | $\varphi_1 = 123.6^\circ$ ; $\varphi_2 = 21.4^\circ$                             | 0.0                |
|           | <i>b</i> | $\varphi_1 = -63.7^\circ$ ; $\varphi_2 = 20.2^\circ$                             | 1.6                |
|           | <i>c</i> | $\varphi_1 = -98.1^\circ$ ; $\varphi_2 = 27.5^\circ$                             | 2.8                |
| <b>4</b>  | <i>a</i> | $\varphi_1 = 120.3^\circ$ ; $\varphi_2 = 45.14^\circ$                            | 0.0                |
|           | <i>b</i> | $\varphi_1 = -62.3^\circ$ ; $\varphi_2 = 46.4^\circ$                             | 0.3                |
|           | <i>c</i> | $\varphi_1 = -104.6^\circ$ ; $\varphi_2 = 46.7^\circ$                            | 1.2                |
| <b>5</b>  | <i>a</i> | $\varphi_1 = 119.8^\circ$ ; $\varphi_2 = 44.8^\circ$                             | 0.0                |
|           | <i>b</i> | $\varphi_1 = -63.2^\circ$ ; $\varphi_2 = 45.8^\circ$                             | 0.1                |
|           | <i>c</i> | $\varphi_1 = -102.2^\circ$ ; $\varphi_2 = 45.5^\circ$                            | 0.9                |

<sup>[a]</sup> optimization yield rotamer *a*.

**Figure S1:** Simplification of Newman projections along the 8-C-glycosyl, C–B ring, and 6-C-glycosyl (for 6,8-di-C-glycosyl flavonoids **1** and **2**) bonds for the three most stable rotamers (*a*, *b*, and *c*). Glycosyl group and B ring highlighted in blue and the flavonoid core in black. Energies relative to rotamer *a* (kcal mol<sup>-1</sup>). Values computed at B3LYP-D3/6-311++G(d,p).

## ROTATIONAL ISOMERISM

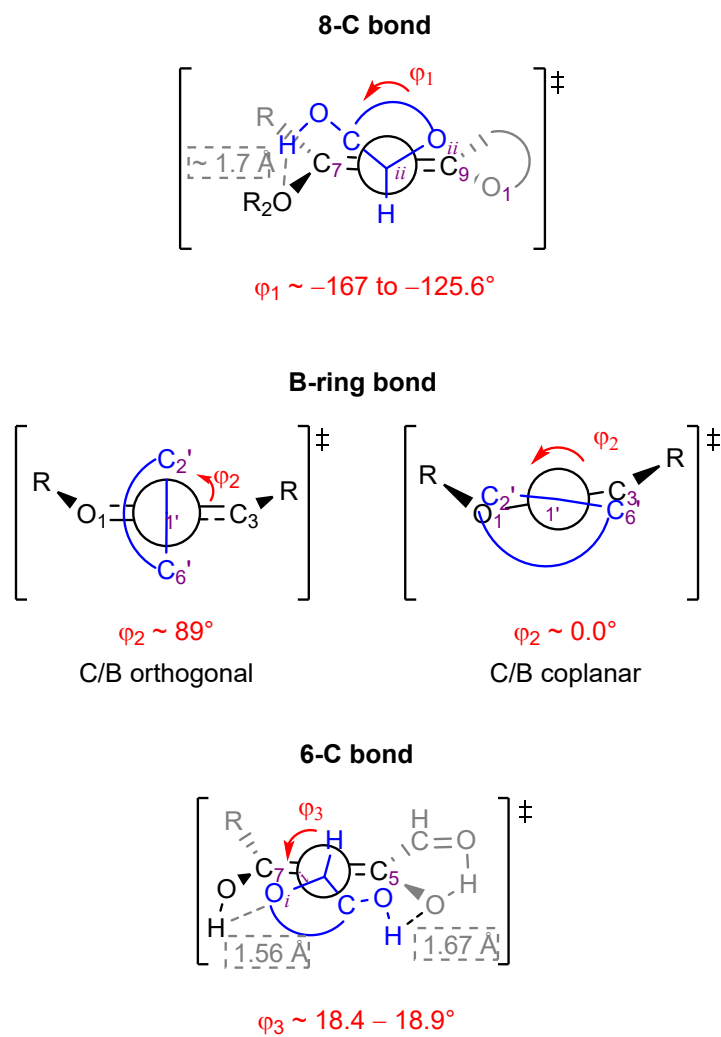

**Figure S2:** Newman projections of the transition state structures along the 8-C, B-ring and 6-C glycosyl bond calculated with B3LYP-D3/6-311++G(d,p).

## Theoretical Rotational Barrier for NMR Signal Duplication

The rotational barrier ( $\Delta G^\ddagger$ ) for identifying NMR signal duplication of 1 and 2 Hz can be calculated from the Eyring equation (1):

$$k = \frac{\kappa k_B T}{h} e^{-\frac{\Delta G^\ddagger}{RT}} \quad (1)$$

where  $k$  is the rate constant,  $k_B$  is the Boltzmann constant ( $1.3807 \times 10^{-23} \text{ J K}^{-1}$ ),  $T$  is temperature (K),  $h$  is Planck constant ( $6.6262 \times 10^{-34} \text{ J.s}$ ),  $R$  is the ideal gas constant ( $R = 8.314 \text{ J K}^{-1} \text{ mol}^{-1}$ ) and  $\kappa$  is the transmission coefficient, which is usually taken as unity for monomolecular processes (such as isomerization).

Thus, to obtain  $\Delta G^\ddagger$  value, we need to calculate the rate constant  $k$ . According to the IUPAC Gold Book<sup>1</sup>, for a process that follows a first-order kinetics, the lifetime of a

molecular entity can be associated with the rate constant by  $t = \frac{1}{k}$ .

From Planck equation, we can correlate the lifetime with the frequency ( $\Delta\nu$ ):

$$\Delta\Delta E \sim \frac{h}{2\pi} \frac{1}{\Delta t} \sim h\Delta\nu \quad (2)$$

$$\Delta t = \frac{1}{2\pi \Delta\nu} \quad (3)$$

According to equation (3), the lifetime of a specie separated by  $\Delta\nu = 1 \text{ Hz}$  and  $\Delta\nu = 2 \text{ Hz}$  is 0.1592 and 0.0796 s, respectively. Its rate constant ( $k$ ) of the isomerization processes is 6.2832 and 12.5664  $\text{s}^{-1}$ . Aimed to confirm the veracity and reproducibility of this protocol, we also calculated the rate constant for an isomerization process with temperature-dependent first-order half-life time ( $t_{1/2}$ ) of approximately 1000 s, which is

reported with a barrier height of 20  $\text{kcal mol}^{-1}$  — thus,  $k = \frac{1}{t} = 0.001 \text{ s}^{-1}$ . Rearranging

equation (1) in terms of the rotational barrier, we have:

1. IUPAC. Compendium of Chemical Terminology, 2nd ed. (the "Gold Book"). Compiled by A. D. McNaught and A. Wilkinson. Blackwell Scientific Publications, Oxford (1997). Online version (2019-) created by S. J. Chalk. ISBN 0-9678550-9-8. <https://doi.org/10.1351/goldbook>.

$$\Delta G^\ddagger = -RT \left[ \ln \left( \frac{kh}{\kappa k_B T} \right) \right] \quad (4)$$

Therefore, according to the calculated rate constants, we have that the barrier heights will be 68.5, 66.7 and 90. kJ mol<sup>-1</sup> for lifetime of 0.1592, 0.0796, and 1000 s, respectively. Converting to kcal mol<sup>-1</sup>, the minimum rotational barrier for identify the isomerization processes with NMR signal separation of 1 and 2 Hz is 16.4 and 16.0 kcal mol<sup>-1</sup>, respectively. For 1000 s, the rotational barrier is 21.6 kcal mol<sup>-1</sup>, in agreement with IUPAC definition (20 kcal mol<sup>-1</sup>) of isomerization and experimental isolation of individual isomers.

## EXPLICIT SOLVATION

**Table S1:** Rotational barrier (kcal mol<sup>-1</sup>) relative to the most stable conformer (*a*) calculated at B3LYP-D3/6-311++G(d,p)/IEFPCM//B3LYP/6-31G(d,p) for 8-C bond rotation using hybrid cluster-continuum solvation model with H<sub>2</sub>O as solvent for **1** and DMSO as solvent for **2–5**. Minimum-energy pathway for the rotational isomerism of each system highlighted in bold.

| Flavonoid | Number of explicit solvent molecules ( <i>n</i> ) | TS dihedral angle                                                                | 8-C bond rotation     |              |
|-----------|---------------------------------------------------|----------------------------------------------------------------------------------|-----------------------|--------------|
| <b>1</b>  | 8                                                 | –                                                                                | $\Delta G_1^\ddagger$ | [ <i>a</i> ] |
|           |                                                   | $\phi_1 = \mathbf{37.0^\circ}$ ; $\phi_2 = 39.4^\circ$ ; $\phi_3 = -48.9^\circ$  | $\Delta G_2^\ddagger$ | <b>20.9</b>  |
| <b>2</b>  | 6                                                 | $\phi_1 = -164.0^\circ$ ; $\phi_2 = -11.0^\circ$ ; $\phi_3 = -35.6^\circ$        | $\Delta G_1^\ddagger$ | 24.6         |
|           |                                                   | $\phi_1 = \mathbf{21.7^\circ}$ ; $\phi_2 = -25.8^\circ$ ; $\phi_3 = -35.7^\circ$ | $\Delta G_2^\ddagger$ | <b>20.4</b>  |
| <b>3</b>  | 4                                                 | $\phi_1 = -168.8^\circ$ ; $\phi_2 = 17.4^\circ$                                  | $\Delta G_1^\ddagger$ | 21.3         |
|           |                                                   | $\phi_1 = \mathbf{20.6^\circ}$ ; $\phi_2 = -11.9^\circ$                          | $\Delta G_2^\ddagger$ | <b>19.8</b>  |
| <b>4</b>  | 3                                                 | $\phi_1 = -\mathbf{171.4^\circ}$ ; $\phi_2 = 35.5^\circ$                         | $\Delta G_1^\ddagger$ | <b>17.3</b>  |
|           |                                                   | $\phi_1 = 22.7^\circ$ ; $\phi_2 = 37.2^\circ$                                    | $\Delta G_2^\ddagger$ | 20.9         |
| <b>5</b>  | 3                                                 | $\phi_1 = -164.7^\circ$ ; $\phi_2 = 37.3^\circ$                                  | $\Delta G_1^\ddagger$ | 19.3         |
|           |                                                   | $\phi_1 = \mathbf{15.0^\circ}$ ; $\phi_2 = 37.3^\circ$                           | $\Delta G_2^\ddagger$ | <b>19.3</b>  |

[*a*] TS not found.

**Table S2:** Absolute values of the Solvation Electronic Energy (kcal mol<sup>-1</sup>) calculated for the minimum-energy point (rotamer *a*) and transition state structures of 8-C bond rotation with C<sub>9</sub>-O<sub>ii</sub> eclipsed (TS1,  $\varphi_1 = -171$  to  $-164^\circ$ ) and C<sub>7</sub>-O<sub>ii</sub> (TS2,  $\varphi_1 = 15$  to  $22^\circ$ ). Solvation energy was obtained from  $\Delta E = E_{AB} - (E_A + E_B)$ , where AB is the interacting solute-solvent complex, A and B is respectively the solute and solvent configuration in the stationary point. Fragments electronic energy calculated at B3LYP-D3/6-311++G(d,p)/IEFPCM level.

| Stationary Points                              | C-Glycosylated Flavonoids |       |       |       |       |
|------------------------------------------------|---------------------------|-------|-------|-------|-------|
|                                                | 1                         | 2     | 3     | 4     | 5     |
| Rotamer <i>a</i>                               | -68.3                     | -58.4 | -50.8 | -55.1 | -35.2 |
| $\Delta E$ TS1 C <sub>9</sub> -O <sub>ii</sub> | [ <i>a</i> ]              | -54.8 | -44.3 | -51.6 | -31.7 |
| TS2 C <sub>7</sub> -O <sub>ii</sub>            | -65.1                     | -55.7 | -49.2 | -46.9 | -36.5 |

[*a*] TS not found.

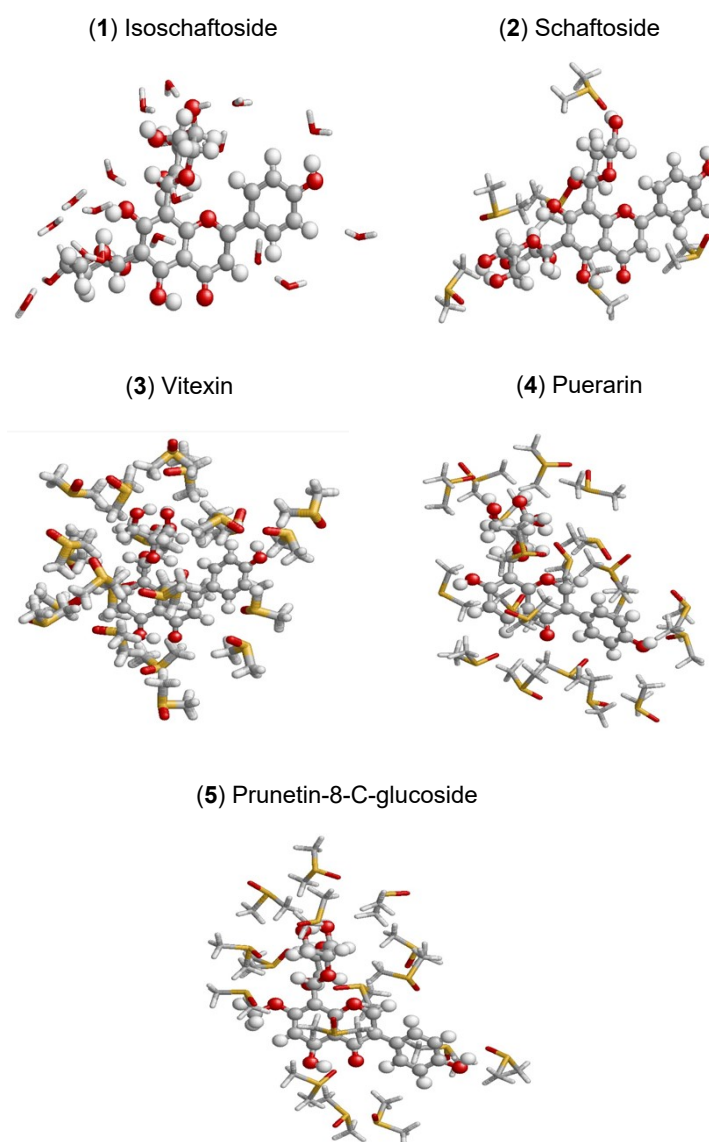

**Figure S3:** Frames generated from molecular dynamics simulations, including all solvent molecules within a 3.0 Å radius from each flavonoid.

## XTB Pre-optimization

### 1 Isoschaftoside

|   |              |              |              |
|---|--------------|--------------|--------------|
| H | 2.589699027  | 10.269860959 | 1.108217389  |
| O | 1.717088240  | 10.475771156 | 1.466387241  |
| C | 1.385015294  | 9.573831044  | 2.433922912  |
| C | 0.179944718  | 9.732128381  | 3.114916889  |
| C | 2.220573553  | 8.507605910  | 2.745980366  |
| H | -0.455244342 | 10.569655942 | 2.875112547  |
| C | -0.183574423 | 8.840743606  | 4.102959708  |
| H | 3.171709338  | 8.391496821  | 2.243972858  |
| C | 1.846991157  | 7.610560692  | 3.724476137  |
| H | -1.114318642 | 8.988624007  | 4.626003118  |
| C | 0.645227118  | 7.761388598  | 4.416509302  |
| H | 2.503683888  | 6.795043266  | 3.977298713  |
| C | 0.318167295  | 6.803150322  | 5.474185760  |
| O | 0.958661063  | 5.632562312  | 5.338405140  |
| C | -0.502977894 | 7.071870414  | 6.523860106  |
| C | 0.856631931  | 4.690517867  | 6.293919353  |
| H | -1.007245654 | 8.019558620  | 6.597481977  |
| C | -0.675884436 | 6.121729336  | 7.584706435  |
| C | 0.088538044  | 4.896097053  | 7.448292330  |
| C | 1.566609044  | 3.506917316  | 6.115889627  |
| O | -1.410181453 | 6.335906481  | 8.574071461  |
| C | 0.104885696  | 3.921915840  | 8.476092623  |
| C | 1.625674902  | 2.579043244  | 7.159067784  |
| C | 2.353383470  | 3.232693165  | 4.864098613  |
| O | -0.613864368 | 4.098855057  | 9.583865027  |
| C | 0.902714854  | 2.787433541  | 8.342088423  |
| O | 2.418133405  | 1.517525094  | 6.971330732  |
| H | 2.621525748  | 2.171080239  | 4.860504684  |
| O | 1.566974698  | 3.531856853  | 3.725625405  |
| C | 3.662298821  | 4.044246583  | 4.900275475  |
| H | -1.089080481 | 4.970286722  | 9.483533422  |
| C | 1.078323533  | 1.861024963  | 9.514732020  |
| H | 2.312843860  | 0.836484693  | 7.666926109  |
| C | 2.225924061  | 3.263928274  | 2.510463839  |
| H | 3.437395107  | 5.098652757  | 5.107618391  |
| O | 4.511373572  | 3.528444519  | 5.909533246  |
| C | 4.426585106  | 3.956131740  | 3.578535190  |
| H | 0.288395213  | 2.058200953  | 10.252297087 |
| O | 1.008418332  | 0.511482689  | 9.067956537  |
| C | 2.453348626  | 2.133686405  | 10.180819761 |
| H | 1.516989865  | 3.591611999  | 1.740650064  |
| C | 2.476060361  | 1.761706663  | 2.230702910  |
| C | 3.484512055  | 4.150697738  | 2.386996000  |
| H | 4.069438456  | 3.652950143  | 6.783993453  |
| H | 4.899214669  | 2.970520535  | 3.508994580  |
| O | 5.433885112  | 4.962124925  | 3.513007714  |
| C | 1.206844351  | -0.436855557 | 10.089482429 |
| H | 3.243406553  | 1.943274065  | 9.439485819  |
| O | 2.571062011  | 3.438511458  | 10.681918922 |
| C | 2.637643828  | 1.152716518  | 11.340580738 |



|   |              |              |              |
|---|--------------|--------------|--------------|
| O | 3.308392875  | 1.092657551  | 3.145276407  |
| H | 1.499287783  | 1.265949017  | 2.264851621  |
| H | 2.869499893  | 1.684660803  | 1.213654277  |
| H | 4.225986796  | 0.991946185  | 2.788260090  |
| H | 3.141825298  | 5.193796794  | 2.417435078  |
| O | 4.175401191  | 3.893781667  | 1.187841573  |
| H | 5.849771407  | 5.049690732  | 4.380978865  |
| H | 0.418346892  | -0.360910105 | 10.849507945 |
| H | 1.152383757  | -1.410986915 | 9.602899834  |
| C | 2.571903815  | -0.259489293 | 10.763537186 |
| H | 2.717005600  | 4.026279482  | 9.918608679  |
| H | 1.831503937  | 1.295659008  | 12.075322196 |
| O | 3.887613294  | 1.355101029  | 11.973628939 |
| H | 3.888692789  | 4.550130989  | 0.521412473  |
| H | 3.365846794  | -0.363038145 | 10.012360952 |
| O | 2.727245763  | -1.257366418 | 11.752907051 |
| H | 3.898535487  | 2.285784215  | 12.234312561 |
| H | 3.428401101  | -0.955788097 | 12.344001206 |
| O | 2.594586321  | -0.848264503 | 5.085105533  |
| H | 1.666928523  | -0.678671059 | 5.324195403  |
| H | 2.784662034  | -0.240715813 | 4.355797398  |
| O | 3.390537353  | 6.165924480  | -0.077609727 |
| H | 2.523935552  | 6.555816516  | 0.047976984  |
| H | 4.004457606  | 6.637354643  | 0.520727521  |
| O | 6.125015697  | 4.404258708  | 9.379283436  |
| H | 6.355655339  | 4.933409530  | 10.143837154 |
| H | 6.198189139  | 3.453266099  | 9.680338692  |
| O | 3.095993372  | -3.220688125 | 9.615570612  |
| H | 2.916612896  | -2.738658462 | 10.434599996 |
| H | 3.793290967  | -3.848283501 | 9.811598322  |
| O | -2.897538450 | 8.627801564  | 8.776731020  |
| H | -2.317856025 | 7.838825715  | 8.760768722  |
| H | -3.778651956 | 8.301973552  | 8.966198576  |
| O | 6.483682817  | 5.214126584  | 6.717678429  |
| H | 6.622487074  | 5.017259818  | 7.657136987  |
| H | 6.006593154  | 4.433981813  | 6.383255823  |
| O | 3.635074474  | 4.440540304  | 8.319691826  |
| H | 3.595790762  | 5.318004475  | 7.900855545  |
| H | 4.521030868  | 4.401065431  | 8.741098711  |
| O | 5.475456316  | 0.931345159  | 5.388784026  |
| H | 4.771561271  | 0.326461566  | 5.132642259  |
| H | 5.062389561  | 1.800585476  | 5.520424473  |
| O | 0.125981716  | -0.176378282 | 6.252254383  |
| H | 0.295318297  | -0.139481361 | 7.201702420  |
| H | -0.131060764 | 0.707723629  | 5.982659311  |
| O | 0.134725942  | 12.950872413 | 1.658215148  |
| H | 0.664634886  | 12.148688897 | 1.584943098  |
| H | -0.071183048 | 13.226844616 | 0.763759335  |
| O | 4.225560717  | 6.695637497  | 6.878966372  |
| H | 5.104588171  | 6.273607202  | 6.740617754  |
| H | 4.390657786  | 7.592890328  | 7.168520120  |
| O | 5.233074854  | 0.598005894  | 8.121545364  |
| H | 4.527738696  | -0.069860050 | 8.030192556  |
| H | 5.565494213  | 0.709445564  | 7.218105479  |
| O | 5.918518672  | 0.855458141  | 2.582385510  |

|   |              |              |              |
|---|--------------|--------------|--------------|
| H | 6.155038475  | 0.781498383  | 3.517580750  |
| H | 6.393478645  | 1.622128483  | 2.207372155  |
| O | 6.855697685  | 3.229875111  | 1.547588618  |
| H | 5.959118690  | 3.442697682  | 1.238533348  |
| H | 7.017921213  | 3.832394305  | 2.278831468  |
| O | 6.155738440  | 1.933852465  | 10.231012889 |
| H | 5.931144159  | 1.407510358  | 9.435432255  |
| H | 5.476066020  | 1.710073012  | 10.881524578 |
| O | -2.433219843 | 9.759078245  | 6.324044040  |
| H | -2.652099710 | 9.405760250  | 7.208595920  |
| H | -2.473456323 | 10.712787919 | 6.404327930  |
| O | 5.179376343  | 7.141604627  | 1.748379419  |
| H | 6.050336528  | 7.171545715  | 1.347648069  |
| H | 5.207233749  | 6.414094837  | 2.394617373  |
| O | 3.144364263  | -1.054124960 | 7.745776196  |
| H | 3.089055840  | -1.948512284 | 8.105500272  |
| H | 3.044202264  | -1.114549025 | 6.776136843  |

## 2 Schaftoside

|   |              |              |              |
|---|--------------|--------------|--------------|
| H | -7.073261902 | -1.235309083 | -2.360050148 |
| O | -7.066956732 | -2.105560769 | -1.942446682 |
| C | -5.805922616 | -2.417164622 | -1.548158743 |
| C | -5.595588264 | -3.632417426 | -0.899969207 |
| C | -4.728228031 | -1.565291913 | -1.769262767 |
| H | -6.442056212 | -4.277974021 | -0.727431896 |
| C | -4.331256429 | -3.986942979 | -0.483613365 |
| H | -4.887148348 | -0.617153516 | -2.266882092 |
| C | -3.463769754 | -1.922995243 | -1.352579805 |
| H | -4.196177407 | -4.920761198 | 0.036688933  |
| C | -3.243169194 | -3.141665660 | -0.706146859 |
| H | -2.630146479 | -1.260236813 | -1.523673875 |
| C | -1.890371737 | -3.467817878 | -0.257322871 |
| O | -1.054883394 | -2.428793223 | -0.349741407 |
| C | -1.483792238 | -4.687770977 | 0.194164110  |
| C | 0.217510785  | -2.533769529 | 0.057818594  |
| H | -2.165427536 | -5.518267770 | 0.250156774  |
| C | -0.143965328 | -4.902536850 | 0.652490311  |
| C | 0.727868571  | -3.741258486 | 0.546557275  |
| C | 1.011700290  | -1.385558171 | -0.000319001 |
| O | 0.260191897  | -5.983924713 | 1.122818745  |
| C | 2.056762810  | -3.791002596 | 1.015075393  |
| C | 2.343328798  | -1.472499949 | 0.399027723  |
| C | 0.388446740  | -0.032269711 | -0.203240576 |
| O | 2.522638810  | -4.909302134 | 1.600045846  |
| C | 2.870170206  | -2.670147589 | 0.905594502  |
| O | 3.124066639  | -0.371417008 | 0.321368083  |
| H | 1.187715700  | 0.709278654  | -0.356141177 |
| O | -0.514546632 | 0.013407877  | -1.284673435 |
| C | -0.342334748 | 0.290281737  | 1.116778635  |
| H | 1.772024741  | -5.582525652 | 1.517090671  |
| C | 4.245049722  | -2.717320262 | 1.531169592  |
| H | 4.043710927  | -0.672738427 | 0.467138651  |
| C | -1.072631812 | 1.292859655  | -1.435661336 |

|   |              |              |              |
|---|--------------|--------------|--------------|
| H | -1.134700794 | -0.460331329 | 1.261524957  |
| O | 0.588145579  | 0.232740308  | 2.170898884  |
| C | -1.012029342 | 1.656843674  | 1.045974963  |
| H | 4.563115149  | -3.767442255 | 1.598732904  |
| O | 5.180088192  | -1.983438043 | 0.754466023  |
| C | 4.144222097  | -2.135274212 | 2.953418743  |
| H | -0.285380915 | 2.040531270  | -1.619955911 |
| H | -1.721191401 | 1.248171461  | -2.311916342 |
| C | -1.882637776 | 1.755704670  | -0.214778368 |
| H | 0.322189326  | 0.875050529  | 2.858743075  |
| H | -0.233992672 | 2.440609662  | 0.995343524  |
| O | -1.760286344 | 1.785313606  | 2.228566610  |
| C | 6.503478464  | -2.004643484 | 1.258986917  |
| H | 3.751410782  | -1.111651754 | 2.907367270  |
| O | 3.232801555  | -2.878320949 | 3.734302747  |
| C | 5.526341481  | -2.077442526 | 3.623078498  |
| H | -2.755027806 | 1.096937996  | -0.074963399 |
| O | -2.290772256 | 3.079706653  | -0.471094749 |
| H | -2.224112360 | 2.650233229  | 2.213444837  |
| H | 7.055255526  | -1.332957606 | 0.589331245  |
| C | 7.184987074  | -3.383810859 | 1.150893607  |
| C | 6.570405961  | -1.434898157 | 2.694942292  |
| H | 3.218939198  | -3.787109185 | 3.403958625  |
| H | 5.842205864  | -3.093714627 | 3.886127331  |
| O | 5.455197920  | -1.367053348 | 4.839531883  |
| H | -2.612306080 | 3.485966702  | 0.350306797  |
| O | 8.573545514  | -3.240823993 | 1.023601890  |
| H | 6.836987623  | -3.880819197 | 0.241304364  |
| H | 6.942850263  | -4.013984269 | 2.017637013  |
| H | 8.878209152  | -2.725332616 | 1.785772125  |
| H | 6.348318338  | -0.359732889 | 2.653981121  |
| O | 7.872243595  | -1.556402376 | 3.212215323  |
| H | 5.171073431  | -0.462156346 | 4.623297804  |
| H | 7.923547247  | -2.386054235 | 3.739702030  |
| C | 1.011319599  | 1.654242479  | 6.997508824  |
| S | 0.506293342  | 0.792524278  | 5.448473055  |
| C | 2.126631997  | 0.005107225  | 5.156330660  |
| O | 0.441465727  | 1.893022008  | 4.437135623  |
| H | 0.232660310  | 2.363253411  | 7.259000360  |
| H | 1.101393473  | 0.900424132  | 7.769882311  |
| H | 1.950395311  | 2.173354549  | 6.842658824  |
| H | 2.003908948  | -0.715536819 | 4.355696728  |
| H | 2.436280026  | -0.502277032 | 6.061085475  |
| H | 2.854870898  | 0.753345010  | 4.865289706  |
| C | 8.226412776  | -1.844452790 | 6.490813316  |
| S | 8.028816911  | -3.648010522 | 6.210302370  |
| C | 6.302292177  | -3.726637890 | 6.848909799  |
| O | 7.912340239  | -3.798943596 | 4.742717798  |
| H | 8.219778447  | -1.662877500 | 7.559293383  |
| H | 7.413374596  | -1.322062203 | 5.995515145  |
| H | 9.177140049  | -1.541007026 | 6.064640597  |
| H | 5.701371435  | -2.969511470 | 6.355761318  |
| H | 5.914384117  | -4.717536820 | 6.635435448  |
| H | 6.335412417  | -3.562915832 | 7.919911871  |
| C | 5.358969238  | 2.226271962  | 1.310844690  |

|   |              |              |             |
|---|--------------|--------------|-------------|
| S | 4.523394233  | 2.403843893  | 2.942679635 |
| C | 2.821994487  | 2.411223440  | 2.271453555 |
| O | 4.679598225  | 1.093434623  | 3.619120406 |
| H | 4.864236332  | 1.461996098  | 0.722326184 |
| H | 6.395515891  | 1.956580012  | 1.487312681 |
| H | 5.309442672  | 3.187338674  | 0.810886417 |
| H | 2.124948830  | 2.488764390  | 3.102028392 |
| H | 2.724758301  | 3.273770417  | 1.621878694 |
| H | 2.632262163  | 1.485947930  | 1.734801362 |
| C | -2.448819749 | -0.782762416 | 4.285174868 |
| S | -2.156280601 | -2.449290523 | 3.554810782 |
| C | -0.329325756 | -2.404611644 | 3.753272916 |
| O | -2.415520156 | -2.312515943 | 2.112101468 |
| H | -2.005129976 | -0.762079430 | 5.273593606 |
| H | -2.019531920 | -0.022128469 | 3.642019024 |
| H | -3.522895313 | -0.638801854 | 4.348631921 |
| H | 0.089976179  | -1.640166182 | 3.107923174 |
| H | -0.121208969 | -2.190497932 | 4.793799730 |
| H | 0.067554379  | -3.375271773 | 3.473615265 |
| C | -2.323431202 | 3.871586720  | 4.789354235 |
| S | -2.150080188 | 5.003311448  | 3.354428783 |
| C | -0.331289452 | 4.795204830  | 3.195327232 |
| O | -2.735835319 | 4.267109270  | 2.204827584 |
| H | -1.809138828 | 2.937501899  | 4.582574925 |
| H | -3.380920880 | 3.691098817  | 4.951528915 |
| H | -1.892755440 | 4.367623148  | 5.651813621 |
| H | -0.054548871 | 3.761563269  | 3.381458760 |
| H | 0.136524117  | 5.448775191  | 3.923249607 |
| H | -0.048827267 | 5.096320808  | 2.191755306 |
| C | 0.118479796  | -3.433668812 | 8.703125595 |
| S | 1.108108044  | -2.291924405 | 7.647965160 |
| C | 1.736213028  | -3.597191267 | 6.518685908 |
| O | 0.110724061  | -1.516823811 | 6.882941942 |
| H | -0.385032092 | -2.839444129 | 9.458779517 |
| H | 0.789745702  | -4.142234172 | 9.174052472 |
| H | -0.616668342 | -3.940895873 | 8.088159280 |
| H | 0.909347941  | -4.181818621 | 6.131698919 |
| H | 2.416657395  | -4.220472499 | 7.087897304 |
| H | 2.266573083  | -3.124019933 | 5.696324322 |

### 3 Vitexin

|   |              |             |             |
|---|--------------|-------------|-------------|
| H | 4.713213561  | 2.169596030 | 0.890483162 |
| O | 4.118576973  | 2.912751146 | 0.597755182 |
| C | 2.856846169  | 2.467043477 | 0.529297453 |
| C | 1.814499836  | 3.374962671 | 0.325153616 |
| C | 2.549322382  | 1.108689653 | 0.643796906 |
| H | 2.057699669  | 4.413022573 | 0.164522250 |
| C | 0.503853971  | 2.957172007 | 0.338855511 |
| H | 3.356610778  | 0.395126779 | 0.711510612 |
| C | 1.240832312  | 0.691929662 | 0.671091323 |
| H | -0.281193556 | 3.672721624 | 0.174666544 |
| C | 0.194123421  | 1.612735276 | 0.554072885 |

|   |              |              |              |
|---|--------------|--------------|--------------|
| H | 1.005048718  | -0.355094750 | 0.768312867  |
| C | -1.170275800 | 1.110248748  | 0.622371833  |
| O | -1.232106119 | -0.122521920 | 1.146759152  |
| C | -2.280090124 | 1.773108683  | 0.186656677  |
| C | -2.389579675 | -0.806216549 | 1.159052675  |
| H | -2.190637506 | 2.764076479  | -0.227998978 |
| C | -3.562572654 | 1.147794198  | 0.221006482  |
| C | -3.578806085 | -0.215851659 | 0.709542070  |
| C | -2.357343501 | -2.119974690 | 1.614964186  |
| O | -4.618177948 | 1.719287209  | -0.156980823 |
| C | -4.769002454 | -0.976004388 | 0.733523406  |
| C | -3.551525840 | -2.849015842 | 1.632766509  |
| C | -1.072087492 | -2.767803133 | 2.065701456  |
| O | -5.917603510 | -0.426727769 | 0.301332348  |
| C | -4.744477928 | -2.275158582 | 1.191712661  |
| O | -3.504132143 | -4.110010613 | 2.055080995  |
| H | -1.257001892 | -3.844368240 | 2.160137564  |
| O | -0.082198906 | -2.524231727 | 1.074086506  |
| C | -0.623162179 | -2.250690183 | 3.450503497  |
| H | -5.667326991 | 0.505713826  | 0.017523805  |
| H | -5.656725368 | -2.849951466 | 1.217898976  |
| H | -4.409688635 | -4.516803353 | 2.163255591  |
| C | 1.169478866  | -3.125637405 | 1.328121878  |
| H | -0.564245313 | -1.152845840 | 3.424492725  |
| O | -1.505036454 | -2.678413023 | 4.459405228  |
| C | 0.766060182  | -2.807900723 | 3.804361619  |
| H | 1.813796094  | -2.790473121 | 0.505773313  |
| C | 1.755539702  | -2.600346781 | 2.653899542  |
| C | 1.112340396  | -4.663777164 | 1.256349685  |
| H | -2.391819613 | -2.301367262 | 4.276240307  |
| H | 0.665877820  | -3.880601848 | 3.999723731  |
| O | 1.285321319  | -2.156843852 | 4.935010354  |
| H | 1.896987791  | -1.510540180 | 2.552187679  |
| O | 2.983258931  | -3.232269941 | 2.894788825  |
| O | 2.386241051  | -5.236103216 | 1.159563305  |
| H | 0.563695948  | -4.946611778 | 0.352725689  |
| H | 0.581218153  | -5.067807143 | 2.130025833  |
| H | 2.938129755  | -4.800059274 | 1.831752341  |
| H | 0.788838209  | -2.472549389 | 5.726524725  |
| H | 3.281644655  | -3.050508193 | 3.829895842  |
| C | 0.801840083  | 0.922497295  | 5.231030541  |
| S | 1.551972278  | 1.385753885  | 6.828107865  |
| H | 1.158078615  | -0.066641158 | 4.962576374  |
| H | -0.273674488 | 0.924351824  | 5.364765568  |
| H | 1.094777792  | 1.661077956  | 4.489578520  |
| C | 0.567582684  | 0.196347160  | 7.823889407  |
| H | 0.648447830  | -0.800033465 | 7.403860882  |
| H | -0.459254634 | 0.544419216  | 7.799503300  |

|   |              |              |              |
|---|--------------|--------------|--------------|
| H | 0.940793447  | 0.210072066  | 8.843254616  |
| O | 2.940333370  | 0.857377820  | 6.803028204  |
| C | -3.605851973 | 3.739735235  | -3.135709540 |
| S | -2.959514181 | 5.056385100  | -2.032435569 |
| H | -3.629332952 | 2.799333475  | -2.595590878 |
| H | -4.600261764 | 4.044158369  | -3.447341873 |
| H | -2.951299575 | 3.654044753  | -3.996603944 |
| C | -4.326718579 | 4.953163233  | -0.826037415 |
| H | -4.072182963 | 5.552626030  | 0.043873516  |
| H | -4.471258806 | 3.918828350  | -0.530146256 |
| H | -5.200661899 | 5.347313829  | -1.332107554 |
| O | -1.778366527 | 4.448958812  | -1.355442374 |
| C | 3.273579566  | -2.142648666 | 7.702604744  |
| S | 3.711104645  | -1.543897277 | 6.036039594  |
| H | 4.030190980  | -2.849930906 | 8.018837116  |
| H | 2.298002260  | -2.610802302 | 7.651174199  |
| H | 3.243072284  | -1.279540832 | 8.355484750  |
| C | 5.357731480  | -0.922073155 | 6.543370652  |
| H | 5.215244395  | -0.228447114 | 7.360767506  |
| H | 5.820523184  | -0.405303344 | 5.709822547  |
| H | 5.955289138  | -1.783931897 | 6.828328517  |
| O | 4.050863394  | -2.796609353 | 5.272172811  |
| C | -0.527962123 | 6.358281235  | 0.881642403  |
| S | -1.657524932 | 5.235672963  | 1.807503977  |
| H | -0.712875430 | 6.208103706  | -0.177081126 |
| H | -0.745482455 | 7.383348342  | 1.160720503  |
| H | 0.490994645  | 6.087046817  | 1.127559098  |
| C | -0.799161711 | 5.468159467  | 3.422421221  |
| H | -1.472528236 | 5.145585944  | 4.208247052  |
| H | -0.550567596 | 6.513683809  | 3.565627820  |
| H | 0.089787572  | 4.843089709  | 3.416890113  |
| O | -2.935281807 | 5.965508312  | 1.923239429  |
| C | 1.156605632  | -0.313223479 | -2.784826745 |
| S | -0.408746971 | 0.503456587  | -2.250366824 |
| H | 1.064242969  | -1.375399825 | -2.582535392 |
| H | 1.315630134  | -0.149668943 | -3.844599563 |
| H | 1.964192444  | 0.106628437  | -2.197137939 |
| C | 0.043323656  | 2.172976048  | -2.859271694 |
| H | -0.655249213 | 2.893469948  | -2.441852640 |
| H | 1.042308080  | 2.408736073  | -2.513921508 |
| H | -0.012750180 | 2.175631918  | -3.942148545 |
| O | -1.438241116 | 0.006225937  | -3.190901202 |
| C | -4.644547298 | -0.386813912 | -3.069034909 |
| S | -5.258983591 | -1.929770755 | -2.291807726 |
| H | -5.058397945 | -0.288496765 | -4.066378509 |
| H | -4.946102100 | 0.441740570  | -2.439653680 |
| H | -3.559585172 | -0.424297845 | -3.127298172 |
| C | -7.047783058 | -1.531881196 | -2.489508001 |

|   |              |              |              |
|---|--------------|--------------|--------------|
| H | -7.288267296 | -0.706401056 | -1.831284934 |
| H | -7.612033606 | -2.412014428 | -2.199420795 |
| H | -7.258407877 | -1.288654318 | -3.524727374 |
| O | -5.004892852 | -3.010184748 | -3.271487735 |
| C | -8.453036692 | 0.315674708  | 2.144060586  |
| S | -9.009093768 | 1.992606794  | 1.619558273  |
| H | -8.161458935 | 0.372743526  | 3.186717361  |
| H | -9.296810958 | -0.357562054 | 2.031276386  |
| H | -7.630492071 | -0.017043169 | 1.519358776  |
| C | -7.359709037 | 2.794001072  | 1.816256508  |
| H | -6.651195912 | 2.366853244  | 1.115292535  |
| H | -7.033709232 | 2.651817100  | 2.839276217  |
| H | -7.477768515 | 3.854110832  | 1.617765592  |
| O | -9.240515133 | 1.903571715  | 0.168429989  |
| C | -2.028809859 | -6.727493746 | 0.805387730  |
| S | -0.918332891 | -7.646310465 | 1.923633407  |
| H | -2.875692951 | -7.347325180 | 0.527858687  |
| H | -2.374470357 | -5.839659730 | 1.325049516  |
| H | -1.463743147 | -6.440760172 | -0.075737465 |
| C | -0.952284969 | -9.204864641 | 0.951845457  |
| H | -0.473525898 | -9.000283799 | 0.001541106  |
| H | -1.980959796 | -9.516493258 | 0.806479066  |
| H | -0.397220671 | -9.966768872 | 1.488994250  |
| O | -1.725605760 | -7.915322697 | 3.146024050  |
| C | 3.625102147  | 5.372413566  | 3.026092396  |
| S | 3.238097013  | 3.652043281  | 3.571659368  |
| H | 4.657868148  | 5.578672399  | 3.278650156  |
| H | 2.953040113  | 6.070293499  | 3.512440773  |
| H | 3.493333900  | 5.412444045  | 1.950608012  |
| C | 3.603824965  | 3.966565058  | 5.343583613  |
| H | 2.911092894  | 4.707115051  | 5.726519799  |
| H | 4.630603578  | 4.297780847  | 5.421506731  |
| H | 3.481983684  | 3.032432452  | 5.881010405  |
| O | 1.757346312  | 3.564692115  | 3.515811085  |
| C | -4.667329543 | 1.091313265  | 3.729493048  |
| S | -2.918113929 | 0.598514740  | 4.045621777  |
| H | -5.003288738 | 1.732210882  | 4.537208004  |
| H | -4.713012272 | 1.607792519  | 2.779761640  |
| H | -5.252777862 | 0.181543464  | 3.684179572  |
| C | -2.269539037 | 2.292592433  | 3.667550857  |
| H | -2.628026640 | 2.618356503  | 2.699109338  |
| H | -1.185765893 | 2.267722862  | 3.656426636  |
| H | -2.613232160 | 2.963418798  | 4.446199579  |
| O | -2.790860560 | 0.505914006  | 5.516492497  |
| C | 0.695118451  | -6.151972847 | 5.242972246  |
| S | 2.462267532  | -5.657038502 | 5.515232523  |
| H | 0.487510573  | -7.057346743 | 5.801233701  |
| H | 0.061904116  | -5.335031244 | 5.569174891  |

|   |              |              |              |
|---|--------------|--------------|--------------|
| H | 0.543981674  | -6.349567376 | 4.186928640  |
| C | 2.247839136  | -5.552664142 | 7.339452375  |
| H | 1.523728426  | -4.771155380 | 7.536532311  |
| H | 3.204903112  | -5.295704755 | 7.777714219  |
| H | 1.912481307  | -6.510613281 | 7.721645978  |
| O | 3.218946817  | -6.905281761 | 5.288291658  |
| C | -2.050834445 | -3.953179925 | -4.109355751 |
| S | -1.012230110 | -4.162333390 | -2.608140178 |
| H | -1.693237567 | -3.063413810 | -4.615607341 |
| H | -1.916489906 | -4.822365605 | -4.744725495 |
| H | -3.095948107 | -3.832808915 | -3.839938053 |
| C | -1.803130256 | -2.808426835 | -1.668102419 |
| H | -1.750642389 | -1.909797757 | -2.270562373 |
| H | -1.254991849 | -2.672764725 | -0.742004027 |
| H | -2.834667853 | -3.070886934 | -1.461924157 |
| O | -1.473357809 | -5.415305419 | -1.959582821 |
| C | -3.558629952 | -7.565355689 | -2.873623351 |
| S | -5.010284363 | -7.326628981 | -1.780655577 |
| H | -3.345425829 | -8.627803764 | -2.925580333 |
| H | -3.833593877 | -7.192329746 | -3.854282914 |
| H | -2.701744011 | -7.020194875 | -2.486861801 |
| C | -4.701511546 | -5.552310197 | -1.458484719 |
| H | -4.877868609 | -5.004929297 | -2.379135303 |
| H | -5.388633521 | -5.206328934 | -0.694481046 |
| H | -3.676599914 | -5.425024006 | -1.127397266 |
| O | -4.685075716 | -8.030121671 | -0.508350650 |
| C | -5.453831605 | -1.249343875 | 6.314793225  |
| S | -4.685555206 | -2.555167574 | 5.267080004  |
| H | -6.310495300 | -0.803351059 | 5.822859848  |
| H | -5.751074269 | -1.706022248 | 7.251539637  |
| H | -4.687526437 | -0.498834119 | 6.484281260  |
| C | -6.276535405 | -3.182205199 | 4.590943973  |
| H | -6.887264558 | -3.509338571 | 5.424119208  |
| H | -6.074052121 | -4.023967942 | 3.935422037  |
| H | -6.770726178 | -2.397405050 | 4.028877331  |
| O | -4.064159221 | -1.804282240 | 4.138029058  |
| C | 5.784258880  | -5.065340210 | 4.475040009  |
| S | 5.364321846  | -4.740166364 | 6.226220760  |
| H | 5.420610708  | -4.233467532 | 3.885946978  |
| H | 6.859748127  | -5.163689798 | 4.381722014  |
| H | 5.274410427  | -5.975158677 | 4.185730772  |
| C | 5.944394666  | -6.400131129 | 6.804074183  |
| H | 5.264210421  | -7.140497822 | 6.401559369  |
| H | 6.958927710  | -6.576221930 | 6.468664034  |
| H | 5.914191520  | -6.408666113 | 7.888851397  |
| O | 6.399515760  | -3.819062356 | 6.743283840  |
| C | 8.438887395  | 2.495162118  | 3.486901101  |
| S | 7.040803293  | 3.661292569  | 3.211918237  |



|   |              |              |              |
|---|--------------|--------------|--------------|
| H | 8.287001443  | 1.604783593  | 2.889280918  |
| H | 9.359357065  | 2.998175322  | 3.213696612  |
| H | 8.455655784  | 2.235128102  | 4.539696502  |
| C | 7.116599889  | 3.594712335  | 1.382375503  |
| H | 8.079535230  | 3.974320253  | 1.062140538  |
| H | 6.316233835  | 4.212133912  | 0.988990502  |
| H | 6.963303628  | 2.567815810  | 1.066898652  |
| O | 5.823430305  | 2.920362584  | 3.599291846  |
| C | -7.081594843 | -7.302569743 | 1.203164837  |
| S | -5.390097336 | -6.689881161 | 1.553413987  |
| H | -7.606994989 | -6.540264852 | 0.637119848  |
| H | -6.988243779 | -8.204997898 | 0.612797513  |
| H | -7.597442792 | -7.487271387 | 2.138546667  |
| C | -4.909448985 | -8.084927445 | 2.621605163  |
| H | -4.992598660 | -8.981484799 | 2.019807760  |
| H | -5.559610528 | -8.123464074 | 3.487984112  |
| H | -3.876477050 | -7.947660945 | 2.932060506  |
| O | -5.639259180 | -5.542864210 | 2.502981325  |
| C | -1.439586227 | -4.171322395 | 8.906028170  |
| S | -1.320162021 | -3.502655239 | 7.190281331  |
| H | -2.478268017 | -4.410229851 | 9.092061812  |
| H | -0.827507682 | -5.064468376 | 8.977814701  |
| H | -1.072003233 | -3.427568510 | 9.603566736  |
| C | -2.270921736 | -1.998692641 | 7.551439141  |
| H | -2.264322614 | -1.355205270 | 6.677078369  |
| H | -3.275828000 | -2.328939968 | 7.777643906  |
| H | -1.825000155 | -1.485421536 | 8.396242170  |
| O | 0.113390763  | -3.058563728 | 7.148343441  |
| C | 4.011311219  | 0.483616015  | 3.581055605  |
| S | 5.703530432  | 0.420827486  | 2.888474004  |
| H | 3.418101380  | 1.164883018  | 2.984717984  |
| H | 3.570682168  | -0.504124628 | 3.589360906  |
| H | 4.082839264  | 0.863524932  | 4.592929245  |
| C | 5.792323497  | -1.410532207 | 2.747235876  |
| H | 6.753618099  | -1.671313694 | 2.315432982  |
| H | 4.994651877  | -1.775157671 | 2.109645471  |
| H | 5.702708612  | -1.838012930 | 3.738889047  |
| O | 5.588747295  | 0.861238117  | 1.461132205  |
| C | -8.331661069 | 4.715954454  | -1.267369159 |
| S | -7.810246316 | 4.024977172  | -2.892778059 |
| H | -8.816570177 | 5.670279146  | -1.444797343 |
| H | -9.024242128 | 4.015549939  | -0.814961982 |
| H | -7.453351580 | 4.857202139  | -0.647485959 |
| C | -7.197694506 | 2.431873019  | -2.206663268 |
| H | -6.309862833 | 2.610632316  | -1.610532842 |
| H | -7.990487526 | 1.998085857  | -1.606591139 |
| H | -6.960135098 | 1.787604371  | -3.046759328 |
| O | -6.600608812 | 4.781730161  | -3.272776903 |

|   |              |               |             |
|---|--------------|---------------|-------------|
| C | -3.079907286 | -5.553485928  | 4.758400134 |
| S | -3.851316884 | -5.904881403  | 6.370145168 |
| H | -3.880465846 | -5.309530618  | 4.071760360 |
| H | -2.410172547 | -4.706006827  | 4.851788677 |
| H | -2.557612991 | -6.433191567  | 4.396619257 |
| C | -2.483536686 | -6.959975445  | 7.013192343 |
| H | -1.561987064 | -6.393592496  | 6.989879245 |
| H | -2.415587709 | -7.833637522  | 6.375624523 |
| H | -2.720549395 | -7.256433939  | 8.029736770 |
| O | -3.765789753 | -4.633847785  | 7.135590550 |
| C | 3.068658409  | -8.237810738  | 2.340586316 |
| S | 2.231207286  | -9.863435070  | 2.542954696 |
| H | 3.894665894  | -8.387377860  | 1.653598232 |
| H | 2.365886002  | -7.529481371  | 1.917646165 |
| H | 3.438722715  | -7.884919455  | 3.296948111 |
| C | 1.414629279  | -9.471671062  | 4.153479143 |
| H | 0.503123066  | -8.922713207  | 3.946386566 |
| H | 2.090365560  | -8.892472543  | 4.772876704 |
| H | 1.182260456  | -10.416815579 | 4.633532506 |
| O | 3.284859403  | -10.838328390 | 2.852990089 |

#### 4 Puerarin

|   |             |              |              |
|---|-------------|--------------|--------------|
| H | 8.639609739 | -4.254635785 | -3.296340862 |
| O | 8.930564350 | -3.512568204 | -2.715675063 |
| C | 7.885935658 | -2.662225967 | -2.570079833 |
| C | 7.972965191 | -1.613116819 | -1.657233550 |
| C | 6.711271439 | -2.834836804 | -3.298003797 |
| H | 8.887891357 | -1.475888850 | -1.101955656 |
| C | 6.893352862 | -0.775892142 | -1.453457349 |
| H | 6.664592710 | -3.641428248 | -4.013528539 |
| C | 5.629104178 | -2.008630602 | -3.077360056 |
| H | 6.966840434 | 0.033995362  | -0.744993751 |
| C | 5.705088344 | -0.977455830 | -2.147133356 |
| H | 4.714561848 | -2.162428685 | -3.631868784 |
| C | 4.519698068 | -0.136207554 | -1.908986232 |
| C | 3.365821631 | -0.713342647 | -1.512370097 |
| C | 4.550724202 | 1.297307553  | -2.152724915 |
| H | 3.300198366 | -1.777719282 | -1.324791826 |
| O | 2.204900044 | -0.086144791 | -1.308341024 |
| O | 5.566751340 | 1.923475475  | -2.464954098 |
| C | 3.235372542 | 1.933723845  | -2.076795097 |
| C | 2.110348252 | 1.223851669  | -1.628387309 |
| C | 3.074676215 | 3.256155272  | -2.504572306 |
| C | 0.851562401 | 1.834245816  | -1.578492933 |
| H | 3.947414102 | 3.795305632  | -2.830194125 |
| C | 1.837134941 | 3.836119988  | -2.543617897 |
| C | 0.717776715 | 3.129701090  | -2.085383968 |

|   |              |              |              |
|---|--------------|--------------|--------------|
| C | -0.414576203 | 1.147554961  | -1.125375113 |
| H | 1.702314607  | 4.838750977  | -2.917843003 |
| O | -0.509584018 | 3.684380703  | -2.149059380 |
| H | -1.134349303 | 1.939089488  | -0.887619103 |
| O | -0.899138345 | 0.370035989  | -2.214388841 |
| C | -0.292139377 | 0.289088506  | 0.133137432  |
| H | -0.573061112 | 4.230250386  | -2.975590896 |
| C | -2.238532448 | -0.042304015 | -2.023430547 |
| H | 0.431407577  | -0.518852914 | -0.029163358 |
| O | 0.131254535  | 1.128301407  | 1.171656163  |
| C | -1.654811062 | -0.348217582 | 0.454426029  |
| H | -2.467113380 | -0.641164595 | -2.912655742 |
| C | -3.232951860 | 1.142893125  | -2.012617407 |
| C | -2.350975796 | -0.940300993 | -0.776902974 |
| H | 0.116131703  | 0.620248622  | 2.009768056  |
| H | -2.297410810 | 0.419154783  | 0.908672519  |
| O | -1.468600604 | -1.428298448 | 1.365657048  |
| O | -4.320040686 | 0.926734554  | -2.870614399 |
| H | -2.719940401 | 2.029490446  | -2.396283456 |
| H | -3.571610284 | 1.348354977  | -0.991380222 |
| H | -4.944335682 | 0.293574551  | -2.449841504 |
| H | -1.851748232 | -1.896897659 | -1.001371021 |
| O | -3.711972591 | -1.165980122 | -0.524706467 |
| H | -0.947692464 | -1.093810267 | 2.134333260  |
| H | -3.810837502 | -1.577644121 | 0.358124198  |
| S | 6.975248391  | -4.980134766 | 1.129469702  |
| O | 7.059510482  | -3.623200618 | 1.712016171  |
| C | 8.593739796  | -5.258852440 | 0.287563576  |
| H | 8.552085944  | -6.235422323 | -0.180510176 |
| H | 8.767692727  | -4.484818865 | -0.451530709 |
| H | 9.373363844  | -5.234282179 | 1.042113844  |
| C | 6.016094757  | -4.816387827 | -0.414945438 |
| H | 6.411694929  | -3.992605906 | -0.997546382 |
| H | 4.982207869  | -4.606902483 | -0.160172156 |
| H | 6.081662104  | -5.745534759 | -0.971978591 |
| S | -7.495569376 | -0.128053773 | 1.367367996  |
| O | -8.262049403 | 0.514554427  | 0.269016287  |
| C | -5.772292438 | 0.453226969  | 1.181634855  |
| H | -5.462265083 | 0.275654174  | 0.157897225  |
| H | -5.715491306 | 1.507812853  | 1.429296861  |
| H | -5.151951202 | -0.118306758 | 1.860121512  |
| C | -7.148530236 | -1.829728151 | 0.783132016  |
| H | -6.359351946 | -2.245415410 | 1.397327902  |
| H | -6.834594723 | -1.747743095 | -0.252717631 |
| H | -8.056634661 | -2.417403125 | 0.866917111  |
| S | 5.282728683  | 1.970799321  | 1.315827496  |
| O | 3.961044339  | 1.332478037  | 1.080373746  |
| C | 5.226135877  | 3.560423604  | 0.431548676  |

|   |              |              |              |
|---|--------------|--------------|--------------|
| H | 5.277516534  | 3.336497409  | -0.625105932 |
| H | 4.302992727  | 4.085907872  | 0.641675000  |
| H | 6.101551504  | 4.120592064  | 0.737692813  |
| C | 5.127632217  | 2.762579064  | 2.985217160  |
| H | 5.957767249  | 3.449419250  | 3.090593407  |
| H | 5.176143503  | 1.996362489  | 3.751128971  |
| H | 4.179549309  | 3.282503332  | 3.053867804  |
| S | 4.952885558  | -2.463655335 | 2.915263711  |
| O | 3.713813912  | -2.066975090 | 3.662666103  |
| C | 4.710962521  | -1.839309628 | 1.223256704  |
| H | 5.686855946  | -1.799701851 | 0.756965931  |
| H | 4.091137513  | -2.550163246 | 0.690076917  |
| H | 4.253002893  | -0.855223001 | 1.246471149  |
| C | 6.203959567  | -1.193987571 | 3.364313596  |
| H | 7.125291846  | -1.519947340 | 2.898722986  |
| H | 6.309739055  | -1.176377847 | 4.444360826  |
| H | 5.901621579  | -0.224032746 | 2.985410987  |
| S | -7.673274674 | 0.366159724  | -2.149362344 |
| O | -6.450308416 | -0.433417751 | -1.877587500 |
| C | -7.637965069 | 0.492281334  | -4.001144508 |
| H | -6.655748869 | 0.824633443  | -4.316132924 |
| H | -7.837099063 | -0.494662337 | -4.405018837 |
| H | -8.408204885 | 1.182091884  | -4.324571026 |
| C | -7.184613813 | 2.115352274  | -1.913177147 |
| H | -6.201265436 | 2.269255565  | -2.344652379 |
| H | -7.176269061 | 2.311116487  | -0.847898877 |
| H | -7.929200229 | 2.739522256  | -2.392917962 |
| S | 8.254604003  | 2.152671551  | 2.207816238  |
| O | 8.194632060  | 3.620792013  | 2.110254346  |
| C | 8.585295188  | 1.866300568  | 4.022521637  |
| H | 9.478164040  | 2.395990624  | 4.331132807  |
| H | 7.734543601  | 2.241569505  | 4.579656617  |
| H | 8.690548953  | 0.800613491  | 4.186618971  |
| C | 9.969898133  | 1.671900158  | 1.739670269  |
| H | 10.202506107 | 0.723882144  | 2.209443138  |
| H | 10.657156516 | 2.447906486  | 2.057108761  |
| H | 9.988486451  | 1.561344678  | 0.663417803  |
| S | -3.019149262 | -2.908661159 | 2.644569456  |
| O | -4.207828270 | -2.490757706 | 1.864677677  |
| C | -2.290790930 | -4.294615613 | 1.679700798  |
| H | -2.120839688 | -3.943597645 | 0.667489802  |
| H | -1.353217854 | -4.572053601 | 2.146766044  |
| H | -2.972378887 | -5.137096159 | 1.664837930  |
| C | -3.745742879 | -4.021227688 | 3.943253493  |
| H | -2.943265903 | -4.583222277 | 4.405959849  |
| H | -4.478660433 | -4.685364028 | 3.500028594  |
| H | -4.229181145 | -3.394567806 | 4.685281201  |
| S | 0.191165973  | 5.127391606  | 1.863221830  |

|   |              |              |              |
|---|--------------|--------------|--------------|
| O | 0.010969370  | 4.921864868  | 3.319358958  |
| C | -1.229941426 | 4.326437821  | 1.041730708  |
| H | -2.118560103 | 4.910943915  | 1.260919165  |
| H | -1.036717279 | 4.324178232  | -0.024279090 |
| H | -1.355195625 | 3.314779073  | 1.414474311  |
| C | 1.473745444  | 3.924320208  | 1.340665911  |
| H | 1.888799538  | 4.269303982  | 0.399137026  |
| H | 2.236889658  | 3.923217075  | 2.111925931  |
| H | 1.055182287  | 2.930881420  | 1.233996677  |
| S | 4.138909001  | -6.885288286 | -3.350413206 |
| O | 5.432785224  | -7.081699755 | -2.646553219 |
| C | 2.856286254  | -7.032627302 | -2.040556440 |
| H | 2.833764105  | -8.059296171 | -1.691104243 |
| H | 3.110539095  | -6.361737279 | -1.228780042 |
| H | 1.903339393  | -6.759873942 | -2.477666886 |
| C | 3.934462114  | -5.088189790 | -3.579654357 |
| H | 4.006306390  | -4.583845196 | -2.621580621 |
| H | 4.724031876  | -4.753348796 | -4.242058180 |
| H | 2.964578641  | -4.916421044 | -4.036121250 |
| S | 1.590510374  | -4.236394407 | -0.279962201 |
| O | 3.002672341  | -3.956589021 | -0.654604651 |
| C | 1.251538098  | -3.066553621 | 1.089360510  |
| H | 1.739933006  | -2.124887491 | 0.866267108  |
| H | 0.182084629  | -2.926666766 | 1.184453194  |
| H | 1.672501455  | -3.474153690 | 2.002781137  |
| C | 0.577809976  | -3.400249317 | -1.548857781 |
| H | 0.710618862  | -2.325134144 | -1.506086984 |
| H | 0.897683725  | -3.775413678 | -2.518066258 |
| H | -0.459226093 | -3.669590187 | -1.377652436 |
| S | 3.329857037  | 7.263451259  | -0.044374255 |
| O | 3.117718076  | 5.917381702  | -0.592797359 |
| C | 3.503734125  | 7.055419665  | 1.780355220  |
| H | 2.644520729  | 6.527750326  | 2.180247357  |
| H | 4.412171121  | 6.490656005  | 1.964037734  |
| H | 3.588844889  | 8.041289081  | 2.222204796  |
| C | 1.659552749  | 8.041474139  | 0.041529486  |
| H | 1.760490913  | 9.008210438  | 0.520616516  |
| H | 0.984935045  | 7.397646396  | 0.596437636  |
| H | 1.300022001  | 8.167510518  | -0.974476941 |
| S | 7.822766418  | 2.873284930  | -1.314709292 |
| O | 7.771451786  | 1.913298332  | -0.176099695 |
| C | 8.662746242  | 1.987386996  | -2.678524872 |
| H | 9.530656943  | 1.457834581  | -2.302502302 |
| H | 7.949728394  | 1.286265457  | -3.097409956 |
| H | 8.942001858  | 2.737189646  | -3.410101022 |
| C | 9.242625506  | 3.973839870  | -0.926161246 |
| H | 10.167320540 | 3.410220035  | -0.894097300 |
| H | 9.044863896  | 4.420567498  | 0.042720223  |

|   |              |              |              |
|---|--------------|--------------|--------------|
| H | 9.282963582  | 4.725227690  | -1.705821119 |
| S | 1.531872123  | -1.017197476 | 3.556154685  |
| O | 0.109023841  | -0.510221075 | 3.343154734  |
| C | 1.497554841  | -1.426460059 | 5.339486790  |
| H | 1.200201882  | -0.551608870 | 5.906569409  |
| H | 0.777033015  | -2.224646850 | 5.483558889  |
| H | 2.490228206  | -1.763816222 | 5.605043086  |
| C | 2.467185080  | 0.534950617  | 3.714784558  |
| H | 1.848686896  | 1.280515798  | 4.202975175  |
| H | 2.740667612  | 0.866946974  | 2.714927359  |
| H | 3.357171091  | 0.314498941  | 4.288588958  |
| S | -0.310508118 | -4.672045311 | -5.271789521 |
| O | 0.951900337  | -4.293858750 | -4.585396435 |
| C | -1.481634589 | -3.304976819 | -4.953429027 |
| H | -1.549397016 | -3.123604549 | -3.885998018 |
| H | -1.122973606 | -2.416477021 | -5.471351151 |
| H | -2.439502712 | -3.605755565 | -5.362903463 |
| C | -1.126078068 | -5.881128890 | -4.148890628 |
| H | -2.030313059 | -6.223516451 | -4.639214394 |
| H | -1.364629080 | -5.410523897 | -3.200127479 |
| H | -0.447935042 | -6.715248151 | -4.001221244 |
| S | 7.081946283  | 5.584906524  | -4.133020414 |
| O | 8.395867542  | 5.059364991  | -3.728072363 |
| C | 6.119164643  | 4.128284546  | -4.714049268 |
| H | 6.620175635  | 3.735221829  | -5.593048990 |
| H | 6.080741925  | 3.367242184  | -3.939620825 |
| H | 5.125619614  | 4.471181479  | -4.981140615 |
| C | 6.136645310  | 5.816352308  | -2.569266134 |
| H | 5.121971117  | 6.112133951  | -2.807536112 |
| H | 6.622698110  | 6.602797038  | -2.001500228 |
| H | 6.150447979  | 4.893664730  | -2.001763104 |
| S | 7.931558797  | -6.823954850 | -3.064382530 |
| O | 7.885256558  | -5.673034321 | -3.993969707 |
| C | 9.756636547  | -7.101431282 | -2.841022679 |
| H | 10.236988800 | -7.213133044 | -3.805739809 |
| H | 10.162710953 | -6.232117031 | -2.334774096 |
| H | 9.904354094  | -7.986524729 | -2.233335685 |
| C | 7.708527453  | -8.299320461 | -4.131734321 |
| H | 7.996555531  | -9.180279308 | -3.570305998 |
| H | 8.313791963  | -8.185646308 | -5.024259504 |
| H | 6.657617047  | -8.352073009 | -4.391054837 |
| S | 1.314894413  | -0.604193386 | -6.049697160 |
| O | -0.077254285 | -0.899330128 | -6.447758540 |
| C | 2.332878899  | -2.019422770 | -6.641478858 |
| H | 2.248482068  | -2.069209857 | -7.721888171 |
| H | 3.360426756  | -1.823605370 | -6.356088913 |
| H | 1.977600754  | -2.941912014 | -6.193723726 |
| C | 1.443420080  | -1.040071335 | -4.275537220 |

|   |              |              |              |
|---|--------------|--------------|--------------|
| H | 0.689778794  | -0.488211202 | -3.720099905 |
| H | 1.292531196  | -2.107248608 | -4.154626489 |
| H | 2.439899730  | -0.757181409 | -3.954923653 |
| S | -0.618987654 | 3.554991142  | -5.742179793 |
| O | -0.602350489 | 4.539951521  | -4.630703909 |
| C | -1.318213362 | 2.007419799  | -5.063132394 |
| H | -0.863184451 | 1.762552424  | -4.108965602 |
| H | -2.386734177 | 2.144703809  | -4.928620190 |
| H | -1.139597082 | 1.212659094  | -5.779962292 |
| C | 1.112200040  | 2.931554854  | -5.854021079 |
| H | 1.747907928  | 3.762122945  | -6.142784047 |
| H | 1.428554010  | 2.542634146  | -4.892458864 |
| H | 1.137056624  | 2.157465056  | -6.611266640 |
| S | -2.986834038 | 1.915181578  | 3.829785262  |
| O | -2.912169078 | 1.863682428  | 2.360061734  |
| C | -1.289262116 | 2.260401574  | 4.429650994  |
| H | -0.624678740 | 1.495351553  | 4.043750275  |
| H | -1.316959373 | 2.245399862  | 5.513975870  |
| H | -0.973627778 | 3.242755260  | 4.083707823  |
| C | -2.977777154 | 0.149320355  | 4.390160185  |
| H | -3.096666896 | 0.142506918  | 5.467911867  |
| H | -2.043167807 | -0.317276670 | 4.097754301  |
| H | -3.810268822 | -0.360950244 | 3.917944127  |
| S | -3.972534112 | -4.464801166 | -2.224247387 |
| O | -2.588552838 | -4.155983769 | -1.780981789 |
| C | -4.690973586 | -2.907468875 | -2.856093352 |
| H | -5.727998246 | -3.101310525 | -3.104110244 |
| H | -4.617298477 | -2.132698288 | -2.097011274 |
| H | -4.149679919 | -2.607743058 | -3.747462340 |
| C | -4.988278154 | -4.520889528 | -0.697123886 |
| H | -6.031996618 | -4.506377197 | -0.987738872 |
| H | -4.753622260 | -3.664912286 | -0.072538635 |
| H | -4.763807751 | -5.447158530 | -0.176403312 |

### 5 Prunetin-8-C-glucoside

|   |             |              |             |
|---|-------------|--------------|-------------|
| H | 6.287197251 | -1.295019665 | 1.992509094 |
| O | 5.966630850 | -0.470940339 | 2.436356769 |
| C | 4.688956142 | -0.232905722 | 2.050481713 |
| C | 3.997498681 | 0.831772146  | 2.619570955 |
| C | 4.044925663 | -1.038015077 | 1.114679117 |
| H | 4.496589145 | 1.444285211  | 3.354801079 |
| C | 2.695303143 | 1.093097039  | 2.244246680 |
| H | 4.579888058 | -1.874214053 | 0.684383714 |
| C | 2.742721837 | -0.768391913 | 0.743532448 |
| H | 2.174446061 | 1.918879510  | 2.699536897 |
| C | 2.046328403 | 0.305798446  | 1.294986304 |
| H | 2.259110188 | -1.401569328 | 0.017690786 |
| C | 0.651810974 | 0.574832845  | 0.925911901 |

|   |              |              |              |
|---|--------------|--------------|--------------|
| C | -0.191461892 | -0.447974470 | 0.646532183  |
| C | 0.132106597  | 1.933721059  | 0.872877656  |
| H | 0.125360557  | -1.480339338 | 0.612389778  |
| O | -1.488068313 | -0.336912308 | 0.382861572  |
| O | 0.834317028  | 2.941215868  | 1.070565502  |
| C | -1.284649583 | 2.032610163  | 0.580953552  |
| C | -2.062545449 | 0.885586043  | 0.379798642  |
| C | -1.918611171 | 3.293321926  | 0.504132068  |
| C | -3.441009626 | 0.952015858  | 0.180044366  |
| O | -1.220717888 | 4.419269948  | 0.644091663  |
| C | -3.285703831 | 3.364260734  | 0.287471091  |
| C | -4.049851723 | 2.210743029  | 0.149722435  |
| C | -4.250859676 | -0.316619443 | 0.072692318  |
| H | -0.273238797 | 4.134648523  | 0.788557971  |
| H | -3.725593556 | 4.345947481  | 0.242822307  |
| O | -5.398715395 | 2.226707894  | -0.008488085 |
| H | -5.301272911 | -0.044596440 | -0.095665601 |
| O | -3.755653699 | -1.063124112 | -1.026642880 |
| C | -4.188120544 | -1.077502895 | 1.422007507  |
| C | -6.052524945 | 3.475480681  | -0.078239909 |
| C | -4.284090091 | -2.354587426 | -1.191294876 |
| H | -3.144381054 | -1.167437338 | 1.744448336  |
| O | -4.944154253 | -0.380943373 | 2.382202329  |
| C | -4.743699866 | -2.499079802 | 1.277164738  |
| H | -7.111091518 | 3.246818032  | -0.196652047 |
| H | -5.906522796 | 4.052576195  | 0.838437454  |
| H | -5.707078638 | 4.053756777  | -0.939412845 |
| H | -3.692393371 | -2.785598506 | -2.007320752 |
| C | -5.757337148 | -2.351816568 | -1.642142370 |
| C | -4.062638339 | -3.180567683 | 0.090496730  |
| H | -4.357171563 | 0.324873584  | 2.756956507  |
| H | -5.822596224 | -2.433059042 | 1.098951916  |
| O | -4.496993663 | -3.276280133 | 2.421537779  |
| O | -6.194822397 | -3.635088233 | -2.027285079 |
| H | -5.857769807 | -1.693117369 | -2.507153051 |
| H | -6.398144260 | -1.964860240 | -0.840043609 |
| H | -5.814193486 | -4.256441632 | -1.378257680 |
| H | -2.983280287 | -3.204414094 | 0.301193087  |
| O | -4.535825546 | -4.499647065 | -0.092046256 |
| H | -5.177777078 | -3.030886132 | 3.087119685  |
| H | -4.804061483 | -4.853041553 | 0.774394340  |
| S | -6.611846546 | -0.998646852 | 4.252042385  |
| C | -7.786298672 | -0.971590117 | 5.686705909  |
| H | -7.862524779 | 0.047550209  | 6.047072122  |
| H | -8.757886835 | -1.342846408 | 5.381598753  |
| H | -7.377807726 | -1.607653972 | 6.464851914  |
| C | -7.791213475 | -0.201835010 | 3.101843484  |
| H | -8.134634900 | 0.723296558  | 3.548757285  |
| H | -8.625041910 | -0.870266641 | 2.902186912  |
| H | -7.241790845 | 0.011130803  | 2.192530468  |
| O | -6.605815123 | -2.436979388 | 3.867922451  |
| S | -1.856133891 | 0.251235710  | 3.476919448  |
| C | -2.320673438 | -0.747886393 | 4.950830334  |
| H | -2.741302856 | -0.085558943 | 5.698622826  |
| H | -3.070614692 | -1.466367261 | 4.635861820  |



|   |               |              |              |
|---|---------------|--------------|--------------|
| H | -1.439568040  | -1.258434022 | 5.314893782  |
| C | -0.610108690  | 1.282243021  | 4.330910087  |
| H | -1.020924258  | 1.671252214  | 5.255266742  |
| H | -0.358866865  | 2.101552966  | 3.665941940  |
| H | 0.257328274   | 0.658737631  | 4.502396530  |
| O | -3.032336028  | 1.163840805  | 3.325482412  |
| S | -0.673663979  | 2.961724059  | -3.325994637 |
| C | 0.419370495   | 4.187787308  | -4.150033110 |
| H | 0.334185233   | 5.165177979  | -3.689054444 |
| H | 1.427106135   | 3.797096101  | -4.060403810 |
| H | 0.128813828   | 4.226083397  | -5.193224513 |
| C | -2.010448548  | 4.182218436  | -2.931962789 |
| H | -1.714322521  | 4.792618323  | -2.087347379 |
| H | -2.204673890  | 4.789225383  | -3.807917617 |
| H | -2.895713621  | 3.605534120  | -2.687149582 |
| O | -0.046185648  | 2.692806135  | -2.004255466 |
| S | -5.043907262  | -2.179576677 | -5.082115928 |
| C | -4.350109597  | -3.868379384 | -4.858227279 |
| H | -4.626891957  | -4.493100491 | -5.699008727 |
| H | -3.271229413  | -3.762721905 | -4.816731833 |
| H | -4.735926068  | -4.268794565 | -3.929049514 |
| C | -6.803597396  | -2.733990930 | -5.122878548 |
| H | -7.033531594  | -3.112300374 | -4.135767172 |
| H | -6.946858601  | -3.483157326 | -5.890976808 |
| H | -7.422328466  | -1.867940745 | -5.330039699 |
| O | -4.707320146  | -1.788271622 | -6.460001725 |
| S | 0.136839770   | -2.950063692 | 3.514020811  |
| C | 1.507418639   | -3.551594328 | 2.447538274  |
| H | 1.183994448   | -3.598994742 | 1.412365636  |
| H | 2.336659097   | -2.861266949 | 2.542813732  |
| H | 1.791989731   | -4.534342814 | 2.805827100  |
| C | -1.195203550  | -3.749509242 | 2.543263743  |
| H | -1.139816553  | -4.812398784 | 2.750891212  |
| H | -1.031377896  | -3.563710669 | 1.486389047  |
| H | -2.163059004  | -3.368931816 | 2.853469157  |
| O | 0.034951143   | -1.490679379 | 3.259789554  |
| S | -9.756390625  | -3.821367599 | 2.054812161  |
| C | -8.052599666  | -3.927366240 | 1.409424028  |
| H | -8.047613259  | -3.559730668 | 0.387659783  |
| H | -7.432456239  | -3.311549482 | 2.052063262  |
| H | -7.708383388  | -4.956522968 | 1.437756272  |
| C | -9.298009033  | -4.281287959 | 3.772939493  |
| H | -9.061013564  | -5.338964297 | 3.772806445  |
| H | -10.146228777 | -4.083685992 | 4.420299770  |
| H | -8.431470028  | -3.701956280 | 4.078246034  |
| O | -10.055106597 | -2.365627219 | 2.086835171  |
| S | 8.453865388   | -2.781404950 | 2.003598573  |
| C | 8.309256889   | -2.437156477 | 3.805969667  |
| H | 7.706407905   | -1.547392010 | 3.953348486  |
| H | 9.305765155   | -2.308877186 | 4.211366912  |
| H | 7.827254510   | -3.290641848 | 4.271596862  |
| C | 9.193316336   | -1.150367648 | 1.581109263  |
| H | 10.169512558  | -1.083287421 | 2.046739306  |
| H | 8.539086229   | -0.356218036 | 1.925413455  |
| H | 9.294484692   | -1.101342982 | 0.501665716  |

|   |               |              |              |
|---|---------------|--------------|--------------|
| O | 7.068666278   | -2.711311780 | 1.491301306  |
| S | 2.865768276   | -2.928300524 | 5.388887316  |
| C | 4.534082751   | -2.791754728 | 4.602583048  |
| H | 5.202059569   | -2.287739829 | 5.292066198  |
| H | 4.895805077   | -3.795548513 | 4.405254427  |
| H | 4.440781436   | -2.239292548 | 3.677240306  |
| C | 2.542319213   | -1.114265968 | 5.387774084  |
| H | 3.410907271   | -0.577765648 | 5.752255647  |
| H | 2.293729167   | -0.811181303 | 4.376806684  |
| H | 1.699051371   | -0.942363840 | 6.048624392  |
| O | 3.127645389   | -3.290801042 | 6.785461692  |
| S | -9.068438573  | -1.894516149 | -1.533498433 |
| C | -9.130848979  | -0.479252308 | -0.361513500 |
| H | -8.136109429  | -0.056013426 | -0.269318669 |
| H | -9.812836037  | 0.271693788  | -0.744319891 |
| H | -9.470494149  | -0.861613787 | 0.595344954  |
| C | -10.859697942 | -2.296396723 | -1.346160717 |
| H | -11.085653473 | -3.181683506 | -1.930873555 |
| H | -11.449474349 | -1.459232281 | -1.702655439 |
| H | -11.043017818 | -2.483811276 | -0.294434380 |
| O | -8.916722417  | -1.302449901 | -2.876003402 |
| S | -6.436020734  | -6.805709442 | -0.482194689 |
| C | -7.341220167  | -8.408271215 | -0.523744278 |
| H | -7.342746757  | -8.746849864 | -1.551795548 |
| H | -6.855005251  | -9.121134409 | 0.132079779  |
| H | -8.356376557  | -8.229557562 | -0.183752216 |
| C | -4.811250125  | -7.516489675 | -0.939079957 |
| H | -4.916837782  | -7.930803272 | -1.933463925 |
| H | -4.526464006  | -8.271312207 | -0.214956371 |
| H | -4.090639545  | -6.706614671 | -0.943345516 |
| O | -6.331048366  | -6.479693418 | 0.961979543  |
| S | 2.044816800   | 0.737988736  | -4.173472086 |
| C | 1.741620987   | -0.093371893 | -2.562968046 |
| H | 2.706989633   | -0.348787410 | -2.142927446 |
| H | 1.242281702   | 0.628857666  | -1.927379640 |
| H | 1.120856346   | -0.970710054 | -2.700454451 |
| C | 2.058071527   | -0.868264890 | -5.123712837 |
| H | 2.193748344   | -0.630536747 | -6.173336019 |
| H | 1.115101836   | -1.386319728 | -4.985769147 |
| H | 2.887714990   | -1.471527119 | -4.774864724 |
| O | 0.739381074   | 1.314058443  | -4.569892066 |
| S | 2.293079751   | 2.821388572  | -1.297572680 |
| C | 2.031516624   | 4.629516558  | -1.108172386 |
| H | 2.731524396   | 5.149550465  | -1.751927103 |
| H | 1.011011768   | 4.842522292  | -1.397434618 |
| H | 2.178984906   | 4.884317770  | -0.067045661 |
| C | 3.904319646   | 2.858978985  | -0.383983811 |
| H | 4.574083889   | 3.571924148  | -0.848656039 |
| H | 3.703333962   | 3.115733775  | 0.647130776  |
| H | 4.332376667   | 1.864188272  | -0.435543231 |
| O | 2.748131601   | 2.645190742  | -2.702314485 |
| S | -2.188182480  | -1.271503448 | -4.145978882 |
| C | -1.940550489  | -0.150434045 | -5.567011821 |
| H | -2.131546562  | -0.697969734 | -6.483272159 |
| H | -2.665155391  | 0.646489878  | -5.449444758 |

|   |              |              |              |
|---|--------------|--------------|--------------|
| H | -0.933923000 | 0.254989077  | -5.539599411 |
| C | -1.708338778 | -0.044627050 | -2.899908876 |
| H | -0.784912860 | 0.430142742  | -3.201249478 |
| H | -1.603502080 | -0.556332391 | -1.953738111 |
| H | -2.504837790 | 0.684961334  | -2.835221159 |
| O | -1.059836975 | -2.255926535 | -4.183528233 |
| S | -0.329166845 | -3.232242524 | -1.795412409 |
| C | -1.384879355 | -4.674101926 | -2.225397544 |
| H | -0.880453064 | -5.591745215 | -1.943650113 |
| H | -2.322113044 | -4.591458338 | -1.686323037 |
| H | -1.556372761 | -4.625439755 | -3.292676056 |
| C | 1.119142110  | -3.825724650 | -2.762948233 |
| H | 1.978395886  | -3.217449608 | -2.501895899 |
| H | 1.324407143  | -4.864617245 | -2.531064354 |
| H | 0.863179925  | -3.693056102 | -3.806283941 |
| O | 0.060136939  | -3.468343467 | -0.375709038 |
| S | -5.180887676 | 0.797290338  | -3.736148086 |
| C | -5.864951348 | 1.061503640  | -5.431642480 |
| H | -5.870588403 | 2.126199121  | -5.637425102 |
| H | -5.227940213 | 0.544066005  | -6.141280797 |
| H | -6.866501908 | 0.653556783  | -5.477361914 |
| C | -6.762688426 | 1.168454362  | -2.870032740 |
| H | -6.522728040 | 1.243740977  | -1.815315631 |
| H | -7.162513550 | 2.112282017  | -3.224240496 |
| H | -7.460224141 | 0.356521885  | -3.049119279 |
| O | -4.322182666 | 1.969411569  | -3.481022132 |
| S | -7.223713225 | -5.760073101 | -3.784309390 |
| C | -8.154686865 | -6.285296130 | -5.298530698 |
| H | -7.441585571 | -6.686500043 | -6.011186143 |
| H | -8.868335282 | -7.057678887 | -5.035147421 |
| H | -8.657633674 | -5.425529180 | -5.724716219 |
| C | -8.725676092 | -5.213615029 | -2.873220167 |
| H | -8.403221029 | -4.928252347 | -1.878761876 |
| H | -9.442014424 | -6.025529895 | -2.822917475 |
| H | -9.134647238 | -4.355307675 | -3.392557092 |
| O | -6.819979258 | -7.025317113 | -3.146986421 |

## MATRICES OF OPTIMIZED STRUCTURES

Pure Solvation model (IEFPCM)

### 1 Isoschaftoside

a Global Minimum Point H-C<sub>7</sub> eclipsed

|   |              |              |              |
|---|--------------|--------------|--------------|
| C | -0.245203000 | -0.973944000 | -0.294899000 |
| C | 0.560082000  | -2.108415000 | -0.452679000 |
| C | 0.262429000  | 0.325614000  | -0.251103000 |
| C | 1.958124000  | -1.920668000 | -0.571789000 |
| C | 1.655881000  | 0.466318000  | -0.384931000 |

|   |              |              |              |
|---|--------------|--------------|--------------|
| C | 2.513975000  | -0.645407000 | -0.548978000 |
| C | -2.196688000 | -2.326489000 | -0.211022000 |
| C | -1.472598000 | -3.469701000 | -0.360327000 |
| O | -1.593814000 | -1.111061000 | -0.163823000 |
| C | -0.041170000 | -3.431366000 | -0.474610000 |
| C | -3.651664000 | -2.212321000 | -0.105297000 |
| C | -4.446346000 | -3.303932000 | 0.283790000  |
| C | -4.282037000 | -0.992507000 | -0.402216000 |
| C | -5.823713000 | -3.183739000 | 0.369147000  |
| C | -5.661388000 | -0.865887000 | -0.322340000 |
| C | -6.437839000 | -1.963494000 | 0.064066000  |
| O | 0.660834000  | -4.467967000 | -0.602940000 |
| C | -0.620304000 | 1.531195000  | -0.049051000 |
| C | 4.017567000  | -0.514147000 | -0.597853000 |
| O | 2.155934000  | 1.721637000  | -0.336383000 |
| O | 4.367616000  | 0.714301000  | -1.262692000 |
| C | 5.779310000  | 0.896222000  | -1.434274000 |
| C | 6.489343000  | 0.924666000  | -0.082683000 |
| O | 7.884308000  | 1.047734000  | -0.343768000 |
| C | 6.165519000  | -0.344912000 | 0.695982000  |
| C | 4.650396000  | -0.525844000 | 0.811482000  |
| O | 4.337010000  | -1.708355000 | 1.543027000  |
| H | 4.428269000  | -1.350456000 | -1.175458000 |
| O | 6.778434000  | -0.229148000 | 1.978336000  |
| C | -1.312780000 | 1.547015000  | 1.330234000  |
| C | -2.192230000 | 2.784505000  | 1.435316000  |
| C | -3.173300000 | 2.838291000  | 0.270279000  |
| C | -2.454856000 | 2.727524000  | -1.087285000 |
| O | -1.615086000 | 1.567150000  | -1.093659000 |
| C | -1.701097000 | 4.000794000  | -1.513433000 |
| O | -2.600736000 | 5.016529000  | -1.957953000 |
| O | -3.921416000 | 4.058889000  | 0.283857000  |
| O | -2.976905000 | 2.786244000  | 2.629653000  |
| O | -0.357069000 | 1.635095000  | 2.388303000  |
| H | 0.014008000  | 2.417969000  | -0.107076000 |
| O | -7.793419000 | -1.907339000 | 0.165919000  |
| O | 2.769981000  | -2.993066000 | -0.683499000 |
| H | -1.968256000 | -4.427448000 | -0.423903000 |
| H | -3.987360000 | -4.249698000 | 0.543639000  |
| H | -3.682519000 | -0.146472000 | -0.712479000 |
| H | -6.437082000 | -4.020737000 | 0.679037000  |
| H | -6.136538000 | 0.079334000  | -0.561729000 |
| H | 3.087081000  | 1.699957000  | -0.642983000 |
| H | 6.183834000  | 0.087562000  | -2.054561000 |

|   |              |              |              |
|---|--------------|--------------|--------------|
| H | 5.906706000  | 1.842114000  | -1.958439000 |
| H | 6.131108000  | 1.786850000  | 0.495238000  |
| H | 8.347308000  | 0.981415000  | 0.500404000  |
| H | 6.586700000  | -1.205836000 | 0.156510000  |
| H | 4.238675000  | 0.304427000  | 1.392546000  |
| H | 4.316230000  | -2.464711000 | 0.940929000  |
| H | 6.555752000  | -1.020172000 | 2.484913000  |
| H | -1.936273000 | 0.656338000  | 1.445797000  |
| H | -1.549970000 | 3.674527000  | 1.418374000  |
| H | -3.858144000 | 1.987998000  | 0.371183000  |
| H | -3.204702000 | 2.533505000  | -1.857544000 |
| H | -1.060690000 | 4.384539000  | -0.711556000 |
| H | -1.062250000 | 3.743448000  | -2.360259000 |
| H | -3.222412000 | 5.167669000  | -1.230982000 |
| H | -4.247713000 | 4.200121000  | 1.181551000  |
| H | -2.372328000 | 2.780643000  | 3.381536000  |
| H | 0.068202000  | 0.776974000  | 2.499571000  |
| H | -8.114806000 | -1.025324000 | -0.059188000 |
| H | 2.175328000  | -3.795922000 | -0.683254000 |

$E = -2061.4685489$  a. u.

$H = -2060.897848$  a. u.

$G = -2061.003977$  a. u.

**b** H-C<sub>9</sub> eclipsed

|   |              |              |              |
|---|--------------|--------------|--------------|
| C | -0.458822000 | -1.085340000 | -0.227844000 |
| C | 0.299719000  | -2.259551000 | -0.320194000 |
| C | 0.104276000  | 0.192165000  | -0.231341000 |
| C | 1.705872000  | -2.137186000 | -0.416410000 |
| C | 1.507475000  | 0.266583000  | -0.327001000 |
| C | 2.317130000  | -0.887093000 | -0.429440000 |
| C | -2.469683000 | -2.355498000 | -0.123955000 |
| C | -1.789002000 | -3.530725000 | -0.219268000 |
| O | -1.818390000 | -1.162885000 | -0.123218000 |
| C | -0.356190000 | -3.555610000 | -0.309919000 |
| C | -3.921616000 | -2.192822000 | -0.026124000 |
| C | -4.746278000 | -3.262872000 | 0.364367000  |
| C | -4.524617000 | -0.960036000 | -0.325997000 |
| C | -6.120330000 | -3.111434000 | 0.444315000  |
| C | -5.901143000 | -0.800905000 | -0.250799000 |
| C | -6.705289000 | -1.878318000 | 0.134422000  |
| O | 0.302659000  | -4.625016000 | -0.388511000 |
| C | -0.770920000 | 1.415100000  | -0.122362000 |

|   |              |              |              |
|---|--------------|--------------|--------------|
| C | 3.825775000  | -0.825054000 | -0.461680000 |
| O | 2.063400000  | 1.497230000  | -0.310890000 |
| O | 4.239716000  | 0.359592000  | -1.168131000 |
| C | 5.659916000  | 0.467259000  | -1.331754000 |
| C | 6.358748000  | 0.512415000  | 0.025174000  |
| O | 7.760257000  | 0.558391000  | -0.225546000 |
| C | 5.966843000  | -0.709526000 | 0.847602000  |
| C | 4.443666000  | -0.812610000 | 0.954007000  |
| O | 4.067301000  | -1.949378000 | 1.726974000  |
| H | 4.203616000  | -1.700224000 | -1.002700000 |
| O | 6.573149000  | -0.574985000 | 2.131258000  |
| C | -0.651501000 | 2.376351000  | -1.321828000 |
| C | -1.552561000 | 3.580918000  | -1.089189000 |
| C | -1.232360000 | 4.230579000  | 0.251785000  |
| C | -1.296585000 | 3.214559000  | 1.406981000  |
| O | -0.453791000 | 2.097312000  | 1.106318000  |
| C | -2.723230000 | 2.785205000  | 1.799476000  |
| O | -3.398837000 | 3.815688000  | 2.521166000  |
| O | -2.147713000 | 5.294589000  | 0.537821000  |
| O | -1.370190000 | 4.588459000  | -2.086788000 |
| O | -1.109915000 | 1.748429000  | -2.522257000 |
| H | -1.808534000 | 1.077586000  | -0.093755000 |
| O | -8.059211000 | -1.790338000 | 0.230493000  |
| O | 2.472674000  | -3.246252000 | -0.472912000 |
| H | -2.319871000 | -4.470782000 | -0.248849000 |
| H | -4.313232000 | -4.219115000 | 0.629104000  |
| H | -3.914966000 | -0.121974000 | -0.635493000 |
| H | -6.753234000 | -3.933855000 | 0.753866000  |
| H | -6.352303000 | 0.155420000  | -0.491895000 |
| H | 2.996828000  | 1.422040000  | -0.601397000 |
| H | 6.030360000  | -0.382388000 | -1.917830000 |
| H | 5.837069000  | 1.385877000  | -1.888967000 |
| H | 6.037425000  | 1.411919000  | 0.566754000  |
| H | 8.212173000  | 0.504738000  | 0.625493000  |
| H | 6.350352000  | -1.609797000 | 0.345508000  |
| H | 4.067580000  | 0.058615000  | 1.498086000  |
| H | 4.015163000  | -2.726817000 | 1.154298000  |
| H | 6.304906000  | -1.333125000 | 2.665329000  |
| H | 0.379841000  | 2.716489000  | -1.431543000 |
| H | -2.598376000 | 3.247083000  | -1.097119000 |
| H | -0.210653000 | 4.625731000  | 0.199608000  |
| H | -0.850820000 | 3.673634000  | 2.292183000  |
| H | -3.314314000 | 2.482766000  | 0.927934000  |
| H | -2.642965000 | 1.924045000  | 2.465460000  |

|   |              |              |              |
|---|--------------|--------------|--------------|
| H | -3.366075000 | 4.605604000  | 1.961600000  |
| H | -2.222455000 | 5.845272000  | -0.251787000 |
| H | -1.603028000 | 4.205511000  | -2.941140000 |
| H | -0.433868000 | 1.134233000  | -2.830774000 |
| H | -8.359261000 | -0.901638000 | 0.002182000  |
| H | 1.844015000  | -4.022870000 | -0.458504000 |

$E = -2061.4661943$  a. u.

$H = -2060.895495$  a. u.

$G = -2061.001989$  a. u.

### c Gauche-like

|   |              |              |              |
|---|--------------|--------------|--------------|
| C | -0.352223000 | -1.016360000 | -0.313459000 |
| C | 0.400873000  | -2.195908000 | -0.302292000 |
| C | 0.212664000  | 0.263382000  | -0.373702000 |
| C | 1.809548000  | -2.084926000 | -0.370237000 |
| C | 1.614868000  | 0.320228000  | -0.461180000 |
| C | 2.422265000  | -0.840984000 | -0.467376000 |
| C | -2.367492000 | -2.271926000 | -0.193006000 |
| C | -1.692168000 | -3.452451000 | -0.162976000 |
| O | -1.715859000 | -1.080404000 | -0.253898000 |
| C | -0.257946000 | -3.487768000 | -0.206219000 |
| C | -3.822816000 | -2.112689000 | -0.182298000 |
| C | -4.649620000 | -3.068712000 | 0.431671000  |
| C | -4.421736000 | -1.002040000 | -0.795727000 |
| C | -6.026996000 | -2.920283000 | 0.432782000  |
| C | -5.800720000 | -0.848773000 | -0.804720000 |
| C | -6.609000000 | -1.808861000 | -0.187172000 |
| O | 0.399817000  | -4.559815000 | -0.182107000 |
| C | -0.724491000 | 1.445742000  | -0.263859000 |
| C | 3.932402000  | -0.786694000 | -0.472748000 |
| O | 2.196101000  | 1.542013000  | -0.551112000 |
| O | 4.368056000  | 0.340250000  | -1.256611000 |
| C | 5.792652000  | 0.437345000  | -1.390656000 |
| C | 6.454534000  | 0.587505000  | -0.023196000 |
| O | 7.861922000  | 0.621395000  | -0.239312000 |
| C | 6.043727000  | -0.572895000 | 0.875624000  |
| C | 4.518183000  | -0.670876000 | 0.952483000  |
| O | 4.123436000  | -1.749071000 | 1.796471000  |
| H | 4.316810000  | -1.701149000 | -0.938781000 |
| O | 6.618178000  | -0.344747000 | 2.160601000  |
| C | -0.242549000 | 2.820355000  | -0.751210000 |
| C | -1.393531000 | 3.807800000  | -0.593220000 |

|   |              |              |              |
|---|--------------|--------------|--------------|
| C | -1.834183000 | 3.859695000  | 0.865942000  |
| C | -2.163307000 | 2.459851000  | 1.416824000  |
| O | -1.080540000 | 1.562614000  | 1.135387000  |
| C | -3.521836000 | 1.901317000  | 0.957867000  |
| O | -4.604482000 | 2.526284000  | 1.647878000  |
| O | -2.990525000 | 4.688982000  | 1.028013000  |
| O | -1.004762000 | 5.135272000  | -0.948981000 |
| O | 0.122946000  | 2.806740000  | -2.128772000 |
| H | -1.617353000 | 1.196612000  | -0.846363000 |
| O | -7.966205000 | -1.717785000 | -0.152615000 |
| O | 2.573830000  | -3.195936000 | -0.322047000 |
| H | -2.232689000 | -4.387610000 | -0.143810000 |
| H | -4.213546000 | -3.922282000 | 0.935863000  |
| H | -3.804379000 | -0.259872000 | -1.283174000 |
| H | -6.664560000 | -3.648828000 | 0.918106000  |
| H | -6.249822000 | 0.011306000  | -1.289176000 |
| H | 3.137301000  | 1.424845000  | -0.808403000 |
| H | 6.176755000  | -0.454711000 | -1.898966000 |
| H | 5.984463000  | 1.310347000  | -2.012382000 |
| H | 6.115901000  | 1.523090000  | 0.441162000  |
| H | 8.291254000  | 0.623232000  | 0.625063000  |
| H | 6.440170000  | -1.505824000 | 0.448914000  |
| H | 4.130011000  | 0.237101000  | 1.423206000  |
| H | 4.073231000  | -2.564163000 | 1.278460000  |
| H | 6.341514000  | -1.065655000 | 2.740010000  |
| H | 0.591213000  | 3.160193000  | -0.135747000 |
| H | -2.233045000 | 3.491090000  | -1.226538000 |
| H | -1.000799000 | 4.271640000  | 1.447770000  |
| H | -2.200122000 | 2.518239000  | 2.506749000  |
| H | -3.657667000 | 1.999037000  | -0.124723000 |
| H | -3.551451000 | 0.839844000  | 1.205132000  |
| H | -4.519133000 | 3.476688000  | 1.483539000  |
| H | -2.827071000 | 5.525167000  | 0.574364000  |
| H | -0.684216000 | 5.111781000  | -1.859109000 |
| H | 1.037549000  | 2.499958000  | -2.173039000 |
| H | -8.264949000 | -0.914348000 | -0.596578000 |
| H | 1.942718000  | -3.968513000 | -0.262329000 |

$E = -2061.4661317$  a. u.

$H = -2060.895342$  a. u.

$G = -2061.000563$  a. u.

Transition state - 8-C bond rotation ( $\varphi_1 = 19.8^\circ$ )



|   |              |              |              |
|---|--------------|--------------|--------------|
| C | -0.481735000 | -0.959879000 | -0.364900000 |
| C | 0.251138000  | -2.098542000 | -0.741925000 |
| C | 0.074017000  | 0.315794000  | -0.178897000 |
| C | 1.650208000  | -1.974184000 | -0.885987000 |
| C | 1.501338000  | 0.327139000  | -0.146545000 |
| C | 2.278780000  | -0.783369000 | -0.560560000 |
| C | -2.456014000 | -2.325503000 | -0.192774000 |
| C | -1.793451000 | -3.440694000 | -0.584466000 |
| O | -1.829412000 | -1.110960000 | -0.133056000 |
| C | -0.399052000 | -3.386053000 | -0.916750000 |
| C | -3.858952000 | -2.253516000 | 0.219044000  |
| C | -4.802147000 | -3.164017000 | -0.289191000 |
| C | -4.283809000 | -1.294824000 | 1.152813000  |
| C | -6.122410000 | -3.124033000 | 0.125918000  |
| C | -5.604819000 | -1.251433000 | 1.575665000  |
| C | -6.528694000 | -2.168816000 | 1.065070000  |
| O | 0.239666000  | -4.400914000 | -1.297329000 |
| C | -0.771984000 | 1.600564000  | 0.038135000  |
| C | 3.791000000  | -0.781134000 | -0.526958000 |
| O | 2.154145000  | 1.397375000  | 0.345012000  |
| O | 4.285092000  | 0.532189000  | -0.849947000 |
| C | 5.714514000  | 0.606543000  | -0.936354000 |
| C | 6.360507000  | 0.218736000  | 0.391984000  |
| O | 7.771431000  | 0.255956000  | 0.198753000  |
| C | 5.879795000  | -1.164299000 | 0.813666000  |
| C | 4.350681000  | -1.206463000 | 0.850371000  |
| O | 3.892773000  | -2.492149000 | 1.261228000  |
| H | 4.156818000  | -1.480778000 | -1.286864000 |
| O | 6.442131000  | -1.441709000 | 2.094406000  |
| C | -1.993678000 | 1.839454000  | -0.918566000 |
| C | -2.506349000 | 3.285819000  | -0.803074000 |
| C | -1.428002000 | 4.342300000  | -0.916207000 |
| C | -0.297546000 | 4.011986000  | 0.059509000  |
| O | 0.126431000  | 2.682765000  | -0.221519000 |
| C | -0.623842000 | 4.253756000  | 1.542919000  |
| O | -0.651582000 | 5.649811000  | 1.842621000  |
| O | -1.948694000 | 5.644066000  | -0.619705000 |
| O | -3.464070000 | 3.560376000  | -1.828090000 |
| O | -3.179826000 | 1.105208000  | -0.638275000 |
| H | -1.134840000 | 1.621510000  | 1.074532000  |
| O | -7.836419000 | -2.180988000 | 1.437884000  |
| O | 2.394027000  | -3.040503000 | -1.251037000 |
| H | -2.295364000 | -4.397008000 | -0.603734000 |
| H | -4.506563000 | -3.895100000 | -1.031399000 |

|   |              |              |              |
|---|--------------|--------------|--------------|
| H | -3.574905000 | -0.585200000 | 1.557928000  |
| H | -6.852409000 | -3.817712000 | -0.272371000 |
| H | -5.919167000 | -0.511407000 | 2.303446000  |
| H | 3.089512000  | 1.356873000  | 0.055748000  |
| H | 6.071335000  | -0.055762000 | -1.734022000 |
| H | 5.953658000  | 1.636288000  | -1.197337000 |
| H | 6.061973000  | 0.939992000  | 1.164196000  |
| H | 8.186406000  | -0.072133000 | 1.005946000  |
| H | 6.239033000  | -1.901525000 | 0.080523000  |
| H | 3.996000000  | -0.505248000 | 1.611132000  |
| H | 3.820979000  | -3.071068000 | 0.489746000  |
| H | 6.116659000  | -2.305121000 | 2.378340000  |
| H | -1.654420000 | 1.661059000  | -1.946620000 |
| H | -2.992592000 | 3.380016000  | 0.176047000  |
| H | -1.021893000 | 4.326224000  | -1.934279000 |
| H | 0.570850000  | 4.631936000  | -0.175509000 |
| H | -1.567804000 | 3.782607000  | 1.838250000  |
| H | 0.174136000  | 3.810625000  | 2.141684000  |
| H | -1.282163000 | 6.050523000  | 1.225885000  |
| H | -2.762160000 | 5.764244000  | -1.125534000 |
| H | -4.181492000 | 2.921620000  | -1.732865000 |
| H | -2.995646000 | 0.167458000  | -0.736227000 |
| H | -8.010276000 | -1.491761000 | 2.091179000  |
| H | 1.751817000  | -3.797340000 | -1.377027000 |

$E = -2061.4374778$  a. u.

$H = -2060.868794$  a. u.

$G = -2060.972333$  a. u.

$f = 46.66i$

Transition state - 8-C bond rotation ( $\varphi_1 = -165.8^\circ$ )

|   |              |              |              |
|---|--------------|--------------|--------------|
| C | -0.383526000 | -1.054912000 | -0.158803000 |
| C | 0.374274000  | -2.222471000 | 0.060739000  |
| C | 0.196510000  | 0.213077000  | -0.401072000 |
| C | 1.781066000  | -2.155728000 | -0.037654000 |
| C | 1.591168000  | 0.173000000  | -0.614207000 |
| C | 2.391659000  | -0.973053000 | -0.424126000 |
| C | -2.389929000 | -2.332225000 | 0.082667000  |
| C | -1.709790000 | -3.475582000 | 0.372093000  |
| O | -1.740560000 | -1.175651000 | -0.177906000 |
| C | -0.280983000 | -3.485529000 | 0.370760000  |
| C | -3.844828000 | -2.177170000 | -0.003807000 |
| C | -4.719132000 | -3.208172000 | 0.384647000  |

|   |              |              |              |
|---|--------------|--------------|--------------|
| C | -4.399258000 | -0.980018000 | -0.484695000 |
| C | -6.091725000 | -3.049601000 | 0.293075000  |
| C | -5.773103000 | -0.813025000 | -0.581738000 |
| C | -6.626171000 | -1.850367000 | -0.192729000 |
| O | 0.387429000  | -4.528461000 | 0.608517000  |
| C | -0.610167000 | 1.540091000  | -0.478218000 |
| C | 3.898832000  | -0.945935000 | -0.527932000 |
| O | 2.209963000  | 1.304766000  | -1.044179000 |
| O | 4.290372000  | -0.064668000 | -1.600367000 |
| C | 5.706312000  | -0.015896000 | -1.828868000 |
| C | 6.438627000  | 0.471044000  | -0.581332000 |
| O | 7.831889000  | 0.438208000  | -0.874160000 |
| C | 6.084097000  | -0.420440000 | 0.602855000  |
| C | 4.566285000  | -0.481848000 | 0.785583000  |
| O | 4.221994000  | -1.313191000 | 1.890705000  |
| H | 4.252199000  | -1.955107000 | -0.766075000 |
| O | 6.727126000  | 0.120265000  | 1.754790000  |
| C | 0.012234000  | 2.765061000  | 0.287459000  |
| C | -1.021540000 | 3.861111000  | 0.589185000  |
| C | -2.336191000 | 3.350998000  | 1.133020000  |
| C | -2.869975000 | 2.264290000  | 0.199132000  |
| O | -1.879768000 | 1.243854000  | 0.112742000  |
| C | -3.354157000 | 2.761489000  | -1.173550000 |
| O | -4.593140000 | 3.460953000  | -1.059809000 |
| O | -3.300046000 | 4.407517000  | 1.224484000  |
| O | -0.500533000 | 4.787528000  | 1.546394000  |
| O | 0.995359000  | 3.493765000  | -0.439550000 |
| H | -0.727327000 | 1.828460000  | -1.531868000 |
| O | -7.981568000 | -1.755613000 | -0.260201000 |
| O | 2.539430000  | -3.237214000 | 0.228225000  |
| H | -2.229505000 | -4.399848000 | 0.574551000  |
| H | -4.333638000 | -4.142196000 | 0.772779000  |
| H | -3.739138000 | -0.180122000 | -0.784549000 |
| H | -6.764004000 | -3.842422000 | 0.596896000  |
| H | -6.183091000 | 0.118731000  | -0.956658000 |
| H | 3.119776000  | 1.081780000  | -1.354550000 |
| H | 6.066068000  | -1.011291000 | -2.113783000 |
| H | 5.859554000  | 0.668786000  | -2.661385000 |
| H | 6.119736000  | 1.496448000  | -0.351867000 |
| H | 8.307161000  | 0.656990000  | -0.063151000 |
| H | 6.461576000  | -1.434092000 | 0.404793000  |
| H | 4.201493000  | 0.518117000  | 1.038016000  |
| H | 4.179358000  | -2.234781000 | 1.601039000  |
| H | 6.484638000  | -0.426274000 | 2.512731000  |

|   |              |              |              |
|---|--------------|--------------|--------------|
| H | 0.416974000  | 2.398898000  | 1.239992000  |
| H | -1.215409000 | 4.391827000  | -0.350139000 |
| H | -2.172752000 | 2.907166000  | 2.121933000  |
| H | -3.722512000 | 1.775447000  | 0.676649000  |
| H | -2.604497000 | 3.386226000  | -1.671218000 |
| H | -3.533170000 | 1.893071000  | -1.810560000 |
| H | -4.460481000 | 4.151887000  | -0.393552000 |
| H | -2.873768000 | 5.164135000  | 1.646747000  |
| H | 0.292620000  | 5.184333000  | 1.165847000  |
| H | 1.698221000  | 2.871755000  | -0.682086000 |
| H | -8.243821000 | -0.895006000 | -0.610055000 |
| H | 1.896631000  | -3.978529000 | 0.437129000  |

$E = -2061.4471476$  a. u.

$H = -2060.877963$  a. u.

$G = -2060.980540$  a. u.

$f = 39.00i$

Transition state –  $C_6$  bond rotation ( $\varphi_3 = 18.9^\circ$ )

|   |              |              |              |
|---|--------------|--------------|--------------|
| C | -0.253100000 | -0.900645000 | -0.200551000 |
| C | 0.620436000  | -1.980419000 | -0.336834000 |
| C | 0.187548000  | 0.416304000  | -0.202812000 |
| C | 2.010625000  | -1.717422000 | -0.463764000 |
| C | 1.573718000  | 0.639484000  | -0.350818000 |
| C | 2.537146000  | -0.421503000 | -0.431909000 |
| C | -2.124635000 | -2.357224000 | -0.101438000 |
| C | -1.333777000 | -3.456425000 | -0.240411000 |
| O | -1.590800000 | -1.110728000 | -0.061820000 |
| C | 0.090193000  | -3.332016000 | -0.356298000 |
| C | -3.583643000 | -2.325567000 | -0.008373000 |
| C | -4.317817000 | -3.450684000 | 0.403345000  |
| C | -4.279483000 | -1.152887000 | -0.346318000 |
| C | -5.700615000 | -3.407343000 | 0.472954000  |
| C | -5.664368000 | -1.103698000 | -0.282668000 |
| C | -6.380431000 | -2.233214000 | 0.128121000  |
| O | 0.846064000  | -4.335360000 | -0.487985000 |
| C | -0.769153000 | 1.575131000  | -0.056121000 |
| C | 4.056230000  | -0.149311000 | -0.606291000 |
| O | 1.923192000  | 1.935413000  | -0.428815000 |
| O | 4.263469000  | 1.225077000  | -0.209610000 |
| C | 5.567177000  | 1.774542000  | -0.419849000 |
| C | 6.521453000  | 1.082656000  | 0.535966000  |
| O | 7.824122000  | 1.621765000  | 0.331989000  |

|   |              |              |              |
|---|--------------|--------------|--------------|
| C | 6.476084000  | -0.399208000 | 0.225476000  |
| C | 5.063201000  | -1.011407000 | 0.228089000  |
| O | 5.305035000  | -2.311044000 | -0.289778000 |
| H | 4.318523000  | -0.256860000 | -1.668286000 |
| O | 7.304822000  | -1.065679000 | 1.177719000  |
| C | -1.468511000 | 1.608248000  | 1.319390000  |
| C | -2.426660000 | 2.789921000  | 1.365383000  |
| C | -3.401244000 | 2.730528000  | 0.195269000  |
| C | -2.668971000 | 2.605413000  | -1.153786000 |
| O | -1.758185000 | 1.500955000  | -1.104976000 |
| C | -1.992886000 | 3.903243000  | -1.633106000 |
| O | -2.951198000 | 4.842757000  | -2.120655000 |
| O | -4.224801000 | 3.901002000  | 0.153803000  |
| O | -3.218942000 | 2.793448000  | 2.555032000  |
| O | -0.525409000 | 1.807711000  | 2.373848000  |
| H | -0.195250000 | 2.497211000  | -0.151743000 |
| O | -7.737753000 | -2.252838000 | 0.215959000  |
| O | 2.800652000  | -2.795784000 | -0.644280000 |
| H | -1.769940000 | -4.442661000 | -0.302818000 |
| H | -3.807542000 | -4.360835000 | 0.693193000  |
| H | -3.725181000 | -0.284126000 | -0.677248000 |
| H | -6.268518000 | -4.269351000 | 0.800387000  |
| H | -6.190464000 | -0.194859000 | -0.553913000 |
| H | 2.908424000  | 1.977374000  | -0.408579000 |
| H | 5.883651000  | 1.635849000  | -1.460077000 |
| H | 5.488380000  | 2.840226000  | -0.209008000 |
| H | 6.189588000  | 1.255614000  | 1.567412000  |
| H | 8.445894000  | 1.079270000  | 0.832741000  |
| H | 6.887237000  | -0.540764000 | -0.783735000 |
| H | 4.697188000  | -1.056492000 | 1.262017000  |
| H | 4.447385000  | -2.761253000 | -0.373222000 |
| H | 7.317202000  | -2.002983000 | 0.947413000  |
| H | -2.034186000 | 0.686264000  | 1.477290000  |
| H | -1.842962000 | 3.718033000  | 1.312790000  |
| H | -4.031970000 | 1.844228000  | 0.331597000  |
| H | -3.400650000 | 2.331159000  | -1.917150000 |
| H | -1.379319000 | 4.358717000  | -0.847906000 |
| H | -1.336963000 | 3.649672000  | -2.467916000 |
| H | -3.583761000 | 4.985160000  | -1.401282000 |
| H | -4.559726000 | 4.062071000  | 1.044999000  |
| H | -2.621487000 | 2.861785000  | 3.309462000  |
| H | -0.037362000 | 0.988425000  | 2.516133000  |
| H | -8.107746000 | -1.398454000 | -0.039238000 |
| H | 2.196289000  | -3.614972000 | -0.612637000 |

$E = -2061.4569894$  a. u.

$H = -2060.888164$  a. u.

$G = -2060.991498$  a. u.

$f = 48.76i$

Transition state – B ring rotation ( $\varphi_2 = 88.6^\circ$ )

|   |              |              |              |
|---|--------------|--------------|--------------|
| C | -0.224676000 | -0.951095000 | -0.335402000 |
| C | 0.584526000  | -2.079798000 | -0.528190000 |
| C | 0.281242000  | 0.346770000  | -0.244807000 |
| C | 1.984814000  | -1.884020000 | -0.628478000 |
| C | 1.674959000  | 0.494274000  | -0.359373000 |
| C | 2.537316000  | -0.610223000 | -0.552541000 |
| C | -2.160428000 | -2.319371000 | -0.278619000 |
| C | -1.444897000 | -3.451195000 | -0.458896000 |
| O | -1.577416000 | -1.094412000 | -0.222437000 |
| C | -0.007429000 | -3.403587000 | -0.596386000 |
| C | -3.628058000 | -2.227607000 | -0.112720000 |
| C | -4.195878000 | -2.280613000 | 1.165288000  |
| C | -4.455057000 | -2.039486000 | -1.223051000 |
| C | -5.569269000 | -2.154727000 | 1.332550000  |
| C | -5.831802000 | -1.912578000 | -1.064142000 |
| C | -6.389520000 | -1.969857000 | 0.216269000  |
| O | 0.691652000  | -4.433046000 | -0.760331000 |
| C | -0.613338000 | 1.544930000  | -0.046475000 |
| C | 4.040948000  | -0.473447000 | -0.580656000 |
| O | 2.171353000  | 1.747624000  | -0.265675000 |
| O | 4.393697000  | 0.777168000  | -1.201715000 |
| C | 5.806647000  | 0.970081000  | -1.350900000 |
| C | 6.501585000  | 0.955985000  | 0.008867000  |
| O | 7.898872000  | 1.090800000  | -0.232989000 |
| C | 6.173012000  | -0.338836000 | 0.742527000  |
| C | 4.657389000  | -0.528018000 | 0.834734000  |
| O | 4.338606000  | -1.733876000 | 1.524640000  |
| H | 4.461247000  | -1.289267000 | -1.180123000 |
| O | 6.770958000  | -0.261931000 | 2.034817000  |
| C | -1.382497000 | 1.510757000  | 1.292252000  |
| C | -2.319865000 | 2.706020000  | 1.372430000  |
| C | -3.230967000 | 2.740889000  | 0.151502000  |
| C | -2.422533000 | 2.725775000  | -1.157843000 |
| O | -1.531234000 | 1.605995000  | -1.157170000 |
| C | -1.699076000 | 4.046774000  | -1.477147000 |
| O | -2.613181000 | 5.053843000  | -1.912593000 |

|   |              |              |              |
|---|--------------|--------------|--------------|
| O | -4.055109000 | 3.912164000  | 0.159641000  |
| O | -3.172241000 | 2.640896000  | 2.518142000  |
| O | -0.484182000 | 1.618411000  | 2.398853000  |
| H | 0.017959000  | 2.435947000  | -0.033422000 |
| O | -7.731008000 | -1.852404000 | 0.441288000  |
| O | 2.801324000  | -2.948479000 | -0.772306000 |
| H | -1.948641000 | -4.406793000 | -0.497609000 |
| H | -3.560551000 | -2.420135000 | 2.032160000  |
| H | -4.024309000 | -1.990769000 | -2.216281000 |
| H | -6.016964000 | -2.197292000 | 2.317905000  |
| H | -6.469682000 | -1.769608000 | -1.929754000 |
| H | 3.105881000  | 1.737773000  | -0.563003000 |
| H | 6.221412000  | 0.184207000  | -1.993251000 |
| H | 5.935774000  | 1.933408000  | -1.841829000 |
| H | 6.134819000  | 1.798018000  | 0.610632000  |
| H | 8.353079000  | 0.998876000  | 0.613559000  |
| H | 6.603185000  | -1.180922000 | 0.180885000  |
| H | 4.236184000  | 0.281721000  | 1.437427000  |
| H | 4.345039000  | -2.473623000 | 0.902046000  |
| H | 6.545882000  | -1.069338000 | 2.513711000  |
| H | -1.975978000 | 0.596788000  | 1.365397000  |
| H | -1.721011000 | 3.624887000  | 1.415408000  |
| H | -3.862282000 | 1.844114000  | 0.175291000  |
| H | -3.111731000 | 2.534643000  | -1.983522000 |
| H | -1.113105000 | 4.407074000  | -0.624203000 |
| H | -1.009609000 | 3.859363000  | -2.302367000 |
| H | -3.286828000 | 5.128780000  | -1.220592000 |
| H | -4.431074000 | 4.005457000  | 1.044192000  |
| H | -2.613490000 | 2.650330000  | 3.304606000  |
| H | -0.045864000 | 0.769903000  | 2.530516000  |
| H | -8.202915000 | -1.728735000 | -0.391246000 |
| H | 2.213962000  | -3.753614000 | -0.808609000 |

$E = -2061.4595302$  a. u.

$H = -2060.890006$  a. u.

$G = -2060.994751$  a. u.

$f = 52.15i$

## 2 Schaftside

a Global Minimum Point H-C<sub>7</sub> eclipsed

|   |              |              |              |
|---|--------------|--------------|--------------|
| C | -0.769975000 | -0.735901000 | -0.169566000 |
| C | -0.018059000 | -1.916022000 | -0.112403000 |

|   |              |              |              |
|---|--------------|--------------|--------------|
| C | -0.197490000 | 0.531708000  | -0.269178000 |
| C | 1.391940000  | -1.808578000 | -0.152746000 |
| C | 1.205989000  | 0.592076000  | -0.303241000 |
| C | 2.013192000  | -0.567883000 | -0.255455000 |
| C | -2.792304000 | -1.977352000 | -0.059849000 |
| C | -2.122354000 | -3.161453000 | -0.000263000 |
| O | -2.129939000 | -0.794557000 | -0.118341000 |
| C | -0.686599000 | -3.201886000 | -0.005481000 |
| C | -4.242874000 | -1.787060000 | -0.095940000 |
| C | -5.125327000 | -2.785373000 | 0.350476000  |
| C | -4.779168000 | -0.588601000 | -0.595940000 |
| C | -6.496516000 | -2.596990000 | 0.294526000  |
| C | -6.151669000 | -0.394417000 | -0.657449000 |
| C | -7.015974000 | -1.400345000 | -0.212677000 |
| O | -0.033787000 | -4.276300000 | 0.057324000  |
| C | 3.522461000  | -0.518559000 | -0.217119000 |
| C | -1.027642000 | 1.788904000  | -0.317481000 |
| O | 1.767569000  | 1.821782000  | -0.368795000 |
| O | -1.963104000 | 1.703053000  | -1.405928000 |
| C | -2.685707000 | 2.917105000  | -1.603310000 |
| C | -3.523929000 | 3.255633000  | -0.371838000 |
| O | -4.184439000 | 4.493594000  | -0.627996000 |
| C | -2.623941000 | 3.339670000  | 0.853737000  |
| C | -1.787537000 | 2.067292000  | 0.999110000  |
| O | -0.907477000 | 2.165370000  | 2.120010000  |
| H | -0.354049000 | 2.634061000  | -0.501932000 |
| O | -3.462060000 | 3.554317000  | 1.989420000  |
| C | 4.070466000  | -0.387525000 | 1.218911000  |
| C | 5.595008000  | -0.292588000 | 1.168888000  |
| C | 6.021587000  | 0.871878000  | 0.282145000  |
| C | 5.401660000  | 0.770726000  | -1.121923000 |
| O | 3.975359000  | 0.604655000  | -1.003631000 |
| C | 6.021205000  | -0.307740000 | -2.027261000 |
| O | 7.301413000  | 0.095057000  | -2.507727000 |
| O | 7.443106000  | 0.919530000  | 0.133952000  |
| O | 6.151697000  | -0.048647000 | 2.459550000  |
| O | 3.660050000  | -1.458279000 | 2.063776000  |
| H | 3.906782000  | -1.443221000 | -0.657601000 |
| O | -8.370453000 | -1.274485000 | -0.244130000 |
| O | 2.151274000  | -2.922295000 | -0.062887000 |
| H | -2.663382000 | -4.096223000 | 0.020628000  |
| H | -4.741775000 | -3.709565000 | 0.764453000  |
| H | -4.110977000 | 0.185213000  | -0.951497000 |
| H | -7.178138000 | -3.361334000 | 0.646593000  |



|   |              |              |              |
|---|--------------|--------------|--------------|
| H | -6.553961000 | 0.532209000  | -1.052718000 |
| H | 2.714023000  | 1.719202000  | -0.602628000 |
| H | -1.999770000 | 3.747717000  | -1.820394000 |
| H | -3.329640000 | 2.761270000  | -2.468824000 |
| H | -4.262389000 | 2.461201000  | -0.203975000 |
| H | -4.643864000 | 4.753326000  | 0.179956000  |
| H | -1.946263000 | 4.197631000  | 0.724712000  |
| H | -2.450075000 | 1.230598000  | 1.221277000  |
| H | -0.238770000 | 2.839547000  | 1.942271000  |
| H | -2.900844000 | 3.569066000  | 2.774565000  |
| H | 3.673922000  | 0.526282000  | 1.671341000  |
| H | 5.998447000  | -1.231728000 | 0.767474000  |
| H | 5.665574000  | 1.797874000  | 0.750264000  |
| H | 5.525157000  | 1.728150000  | -1.630551000 |
| H | 6.089101000  | -1.276049000 | -1.519154000 |
| H | 5.373115000  | -0.428131000 | -2.897071000 |
| H | 7.840675000  | 0.288881000  | -1.726938000 |
| H | 7.838896000  | 0.830989000  | 1.010248000  |
| H | 5.894914000  | -0.779180000 | 3.035875000  |
| H | 3.589152000  | -2.272166000 | 1.545928000  |
| H | -8.623001000 | -0.417759000 | -0.610219000 |
| H | 1.514819000  | -3.690517000 | -0.000887000 |

$E = -2061.4665527$  a. u.

$H = -2060.895733$  a. u.

$G = -2061.001176$  a. u.

**b** H-C<sub>9</sub> eclipsed

|   |              |              |              |
|---|--------------|--------------|--------------|
| C | -1.051617000 | -0.826978000 | -0.027143000 |
| C | -0.354302000 | -2.028117000 | -0.216164000 |
| C | -0.420276000 | 0.409138000  | 0.108769000  |
| C | 1.057469000  | -1.976296000 | -0.266660000 |
| C | 0.986693000  | 0.414219000  | 0.051750000  |
| C | 1.736349000  | -0.767929000 | -0.143278000 |
| C | -3.130512000 | -1.987063000 | -0.116993000 |
| C | -2.508648000 | -3.183274000 | -0.307620000 |
| O | -2.418036000 | -0.838481000 | 0.026599000  |
| C | -1.077257000 | -3.279362000 | -0.356595000 |
| C | -4.575910000 | -1.757686000 | -0.054950000 |
| C | -5.470807000 | -2.823822000 | 0.148599000  |
| C | -5.104494000 | -0.465039000 | -0.205677000 |
| C | -6.837964000 | -2.610021000 | 0.189612000  |
| C | -6.473993000 | -0.242493000 | -0.168624000 |

|   |              |              |              |
|---|--------------|--------------|--------------|
| C | -7.347497000 | -1.316618000 | 0.027553000  |
| O | -0.473842000 | -4.371153000 | -0.524926000 |
| C | 3.247278000  | -0.796526000 | -0.154358000 |
| C | -1.225240000 | 1.671044000  | 0.287889000  |
| O | 1.605552000  | 1.606055000  | 0.192911000  |
| O | -0.904375000 | 2.261800000  | 1.556931000  |
| C | -1.734902000 | 3.378901000  | 1.865667000  |
| C | -1.551185000 | 4.491074000  | 0.834879000  |
| O | -2.426646000 | 5.559474000  | 1.191279000  |
| C | -1.857226000 | 3.951829000  | -0.556971000 |
| C | -1.025566000 | 2.701788000  | -0.845640000 |
| O | -1.354085000 | 2.160240000  | -2.127694000 |
| H | -2.287491000 | 1.400292000  | 0.297623000  |
| O | -1.586791000 | 4.994508000  | -1.494289000 |
| C | 3.848889000  | -0.980443000 | 1.253659000  |
| C | 5.374185000  | -0.959038000 | 1.152236000  |
| C | 5.840646000  | 0.335163000  | 0.493802000  |
| C | 5.163909000  | 0.553463000  | -0.870340000 |
| O | 3.736249000  | 0.437570000  | -0.721158000 |
| C | 5.686279000  | -0.345566000 | -2.004114000 |
| O | 6.965914000  | 0.088129000  | -2.458397000 |
| O | 7.255818000  | 0.333407000  | 0.287582000  |
| O | 5.989045000  | -1.010708000 | 2.438220000  |
| O | 3.404611000  | -2.174273000 | 1.891560000  |
| H | 3.567385000  | -1.631924000 | -0.784172000 |
| O | -8.698745000 | -1.170261000 | 0.074922000  |
| O | 1.765158000  | -3.117484000 | -0.414393000 |
| H | -3.084586000 | -4.085879000 | -0.447621000 |
| H | -5.100287000 | -3.830260000 | 0.295056000  |
| H | -4.441939000 | 0.374458000  | -0.364925000 |
| H | -7.524269000 | -3.431430000 | 0.353973000  |
| H | -6.865570000 | 0.761232000  | -0.293663000 |
| H | 2.540260000  | 1.504409000  | -0.084333000 |
| H | -2.792324000 | 3.080228000  | 1.900530000  |
| H | -1.438735000 | 3.726778000  | 2.855260000  |
| H | -0.507421000 | 4.830661000  | 0.854319000  |
| H | -2.375938000 | 6.224661000  | 0.494070000  |
| H | -2.925407000 | 3.686938000  | -0.595878000 |
| H | 0.025504000  | 2.977876000  | -0.906501000 |
| H | -2.268508000 | 1.848732000  | -2.120172000 |
| H | -1.726114000 | 4.639995000  | -2.381146000 |
| H | 3.524771000  | -0.153792000 | 1.892985000  |
| H | 5.703909000  | -1.818931000 | 0.553886000  |
| H | 5.563160000  | 1.166112000  | 1.154020000  |

|   |              |              |              |
|---|--------------|--------------|--------------|
| H | 5.324529000  | 1.587349000  | -1.179983000 |
| H | 5.721645000  | -1.398886000 | -1.705031000 |
| H | 4.997621000  | -0.256949000 | -2.846151000 |
| H | 7.546528000  | 0.093184000  | -1.683322000 |
| H | 7.678800000  | 0.055278000  | 1.109726000  |
| H | 5.700684000  | -1.824442000 | 2.870200000  |
| H | 3.250313000  | -2.859888000 | 1.226767000  |
| H | -8.944937000 | -0.243962000 | -0.039767000 |
| H | 1.093978000  | -3.854518000 | -0.494636000 |

$E = -2061.4635294$  a. u.

$H = -2060.892732$  a. u.

$G = -2060.998529$  a. u.

**c** Gauche-like – converge to **a** form

Transition state - 8-C bond rotation ( $\varphi_1 = 7.2^\circ$ )

|   |              |              |              |
|---|--------------|--------------|--------------|
| C | 0.891883000  | -0.729803000 | -0.127350000 |
| C | 0.197450000  | -1.923323000 | 0.140216000  |
| C | 0.280168000  | 0.515681000  | -0.347971000 |
| C | -1.209247000 | -1.866333000 | 0.243830000  |
| C | -1.135056000 | 0.522090000  | -0.176065000 |
| C | -1.869439000 | -0.655548000 | 0.125162000  |
| C | 2.959265000  | -1.942854000 | 0.034918000  |
| C | 2.329196000  | -3.122663000 | 0.235271000  |
| O | 2.268676000  | -0.783227000 | -0.184265000 |
| C | 0.896603000  | -3.187252000 | 0.290388000  |
| C | 4.414795000  | -1.757850000 | 0.061680000  |
| C | 5.257920000  | -2.675187000 | -0.585010000 |
| C | 4.989044000  | -0.703567000 | 0.786184000  |
| C | 6.635656000  | -2.537854000 | -0.519929000 |
| C | 6.368316000  | -0.564064000 | 0.862074000  |
| C | 7.195822000  | -1.480944000 | 0.205809000  |
| O | 0.281258000  | -4.265163000 | 0.491825000  |
| C | -3.380884000 | -0.682692000 | 0.210628000  |
| C | 1.104180000  | 1.723002000  | -0.872570000 |
| O | -1.834053000 | 1.665402000  | -0.308368000 |
| O | 0.219662000  | 2.828991000  | -0.971368000 |
| C | 0.794961000  | 4.109492000  | -1.152578000 |
| C | 1.585504000  | 4.462491000  | 0.096817000  |
| O | 2.001920000  | 5.824226000  | 0.015886000  |
| C | 2.773705000  | 3.528724000  | 0.135468000  |
| C | 2.427392000  | 2.037925000  | -0.069416000 |

|   |              |              |              |
|---|--------------|--------------|--------------|
| O | 3.571922000  | 1.545538000  | -0.772031000 |
| H | 1.448436000  | 1.461398000  | -1.885754000 |
| O | 3.466962000  | 3.737058000  | 1.370927000  |
| C | -4.046008000 | -0.833878000 | -1.172420000 |
| C | -5.564856000 | -0.811621000 | -1.005849000 |
| C | -5.998166000 | 0.466912000  | -0.296778000 |
| C | -5.268908000 | 0.645177000  | 1.045963000  |
| O | -3.847767000 | 0.531190000  | 0.839528000  |
| C | -5.749244000 | -0.285509000 | 2.172448000  |
| O | -7.009680000 | 0.136192000  | 2.687764000  |
| O | -7.404324000 | 0.466776000  | -0.037320000 |
| O | -6.234576000 | -0.828367000 | -2.265323000 |
| O | -3.630377000 | -2.016279000 | -1.850486000 |
| H | -3.668914000 | -1.535247000 | 0.831041000  |
| O | 8.554461000  | -1.400207000 | 0.235750000  |
| O | -1.923492000 | -2.994417000 | 0.443807000  |
| H | 2.905459000  | -4.016890000 | 0.424787000  |
| H | 4.829063000  | -3.489806000 | -1.156207000 |
| H | 4.357179000  | 0.001238000  | 1.310808000  |
| H | 7.289693000  | -3.235059000 | -1.028772000 |
| H | 6.801807000  | 0.248997000  | 1.434032000  |
| H | -2.729306000 | 1.522627000  | 0.065220000  |
| H | 1.437743000  | 4.151961000  | -2.043754000 |
| H | -0.037079000 | 4.800477000  | -1.292279000 |
| H | 0.945789000  | 4.307552000  | 0.974847000  |
| H | 2.640397000  | 5.975022000  | 0.723953000  |
| H | 3.423561000  | 3.818905000  | -0.698108000 |
| H | 2.356585000  | 1.581066000  | 0.923031000  |
| H | 3.486396000  | 0.589884000  | -0.851118000 |
| H | 4.347278000  | 3.351018000  | 1.296767000  |
| H | -3.747869000 | 0.002300000  | -1.811355000 |
| H | -5.872498000 | -1.685492000 | -0.416083000 |
| H | -5.740393000 | 1.313639000  | -0.944923000 |
| H | -5.414467000 | 1.669960000  | 1.391082000  |
| H | -5.798628000 | -1.329554000 | 1.844560000  |
| H | -5.028776000 | -0.222333000 | 2.989750000  |
| H | -7.619337000 | 0.165295000  | 1.935878000  |
| H | -7.858748000 | 0.207079000  | -0.848715000 |
| H | -5.974154000 | -1.634379000 | -2.728283000 |
| H | -3.485923000 | -2.724654000 | -1.207870000 |
| H | 8.839607000  | -0.641619000 | 0.760103000  |
| H | -1.257946000 | -3.738421000 | 0.511227000  |

$E = -2061.4319677$  a. u.

$H = -2060.862927$  a. u.  
 $G = -2060.967008$  a. u.  
 $f = 47.93i$

Transition state - 8-C bond rotation ( $\varphi_1 = -166.1^\circ$ )

|   |              |              |              |
|---|--------------|--------------|--------------|
| C | -0.983309000 | -0.804077000 | -0.059062000 |
| C | -0.277942000 | -1.972637000 | 0.289020000  |
| C | -0.352667000 | 0.431885000  | -0.337436000 |
| C | 1.133114000  | -1.945309000 | 0.289572000  |
| C | 1.050997000  | 0.343987000  | -0.448919000 |
| C | 1.803217000  | -0.806035000 | -0.128092000 |
| C | -3.036820000 | -2.013338000 | 0.109151000  |
| C | -2.414300000 | -3.153914000 | 0.516044000  |
| O | -2.337514000 | -0.891741000 | -0.169683000 |
| C | -0.990001000 | -3.197544000 | 0.626756000  |
| C | -4.475387000 | -1.826833000 | -0.099300000 |
| C | -5.410732000 | -2.765538000 | 0.371127000  |
| C | -4.950029000 | -0.694643000 | -0.782054000 |
| C | -6.768002000 | -2.583354000 | 0.164877000  |
| C | -6.308191000 | -0.507679000 | -0.996965000 |
| C | -7.223434000 | -1.452754000 | -0.522985000 |
| O | -0.370081000 | -4.238331000 | 0.977410000  |
| C | 3.314524000  | -0.826027000 | -0.119209000 |
| C | -1.123679000 | 1.762686000  | -0.558694000 |
| O | 1.729421000  | 1.429228000  | -0.908403000 |
| O | -2.438098000 | 1.540119000  | -0.047650000 |
| C | -3.373716000 | 2.592140000  | -0.225763000 |
| C | -2.967108000 | 3.759939000  | 0.654838000  |
| O | -3.914344000 | 4.813413000  | 0.486001000  |
| C | -1.582456000 | 4.179800000  | 0.216584000  |
| C | -0.553722000 | 3.035478000  | 0.171880000  |
| O | 0.551390000  | 3.672313000  | -0.459521000 |
| H | -1.169990000 | 1.985943000  | -1.635885000 |
| O | -1.136410000 | 5.212047000  | 1.099121000  |
| C | 3.896966000  | -0.292845000 | 1.205096000  |
| C | 5.422742000  | -0.289830000 | 1.122241000  |
| C | 5.882288000  | 0.532428000  | -0.077100000 |
| C | 5.236807000  | 0.038197000  | -1.383414000 |
| O | 3.805618000  | -0.023593000 | -1.217294000 |
| C | 5.794360000  | -1.291768000 | -1.918082000 |
| O | 7.080216000  | -1.112550000 | -2.505537000 |
| O | 7.301356000  | 0.468729000  | -0.238441000 |
| O | 6.012296000  | 0.304460000  | 2.276643000  |

|   |              |              |              |
|---|--------------|--------------|--------------|
| O | 3.451364000  | -1.039227000 | 2.333278000  |
| H | 3.643056000  | -1.859429000 | -0.258635000 |
| O | -8.567375000 | -1.328386000 | -0.695344000 |
| O | 1.839844000  | -3.023711000 | 0.682572000  |
| H | -2.974682000 | -4.052715000 | 0.725359000  |
| H | -5.084439000 | -3.639991000 | 0.919338000  |
| H | -4.244690000 | 0.039637000  | -1.145118000 |
| H | -7.488191000 | -3.302445000 | 0.535077000  |
| H | -6.659355000 | 0.368988000  | -1.530521000 |
| H | 2.651330000  | 1.163137000  | -1.137843000 |
| H | -3.428478000 | 2.906364000  | -1.277274000 |
| H | -4.344732000 | 2.194646000  | 0.070837000  |
| H | -2.941904000 | 3.430974000  | 1.701471000  |
| H | -3.565135000 | 5.593930000  | 0.933450000  |
| H | -1.663674000 | 4.580889000  | -0.803411000 |
| H | -0.304292000 | 2.745836000  | 1.201361000  |
| H | 1.241029000  | 3.005000000  | -0.597704000 |
| H | -0.269005000 | 5.501734000  | 0.790242000  |
| H | 3.549245000  | 0.732025000  | 1.364207000  |
| H | 5.777432000  | -1.323986000 | 1.019298000  |
| H | 5.573694000  | 1.571898000  | 0.089541000  |
| H | 5.390575000  | 0.789617000  | -2.159248000 |
| H | 5.831375000  | -2.059934000 | -1.137590000 |
| H | 5.125646000  | -1.643557000 | -2.705555000 |
| H | 7.642250000  | -0.715064000 | -1.824389000 |
| H | 7.708890000  | 0.634518000  | 0.621092000  |
| H | 5.729085000  | -0.202375000 | 3.047892000  |
| H | 3.363244000  | -1.971731000 | 2.092481000  |
| H | -8.773863000 | -0.515080000 | -1.172542000 |
| H | 1.162991000  | -3.735483000 | 0.888173000  |

$E = -2061.4455878$  a. u.

$H = -2060.876703$  a. u.

$G = -2060.979976$  a. u.

$f = 55.59i$

Transition state – C<sub>6</sub> bond rotation ( $\varphi_3 = 18.4^\circ$ )

|   |              |              |              |
|---|--------------|--------------|--------------|
| C | 0.821528000  | 0.723814000  | -0.209315000 |
| C | 0.068030000  | 1.898574000  | -0.224925000 |
| C | 0.239010000  | -0.534221000 | -0.285734000 |
| C | -1.346390000 | 1.796635000  | -0.297141000 |
| C | -1.168696000 | -0.595617000 | -0.375128000 |
| C | -2.011012000 | 0.565480000  | -0.324973000 |

|   |              |              |              |
|---|--------------|--------------|--------------|
| C | 2.845242000  | 1.959110000  | -0.097053000 |
| C | 2.175590000  | 3.144378000  | -0.121296000 |
| O | 2.178775000  | 0.778030000  | -0.120982000 |
| C | 0.743308000  | 3.183005000  | -0.176802000 |
| C | 4.294481000  | 1.765148000  | -0.072256000 |
| C | 5.163631000  | 2.784885000  | 0.351715000  |
| C | 4.844127000  | 0.541373000  | -0.490014000 |
| C | 6.535142000  | 2.592169000  | 0.354090000  |
| C | 6.217131000  | 0.342855000  | -0.493294000 |
| C | 7.068363000  | 1.369761000  | -0.071296000 |
| O | 0.098231000  | 4.268687000  | -0.200595000 |
| C | -3.559634000 | 0.480325000  | -0.422605000 |
| C | 1.068862000  | -1.795462000 | -0.279783000 |
| O | -1.662086000 | -1.836508000 | -0.531745000 |
| O | 2.020712000  | -1.752392000 | -1.358181000 |
| C | 2.725327000  | -2.984123000 | -1.501200000 |
| C | 3.533618000  | -3.299653000 | -0.242882000 |
| O | 4.163096000  | -4.563704000 | -0.441853000 |
| C | 2.616536000  | -3.316140000 | 0.973156000  |
| C | 1.812382000  | -2.024236000 | 1.056193000  |
| O | 0.894994000  | -2.186330000 | 2.140559000  |
| H | 0.400562000  | -2.647527000 | -0.429329000 |
| O | 3.439302000  | -3.508230000 | 2.125497000  |
| C | -4.400298000 | 1.381137000  | 0.541523000  |
| C | -5.863300000 | 0.917495000  | 0.628324000  |
| C | -6.037791000 | -0.568145000 | 0.862299000  |
| C | -5.255646000 | -1.345398000 | -0.196173000 |
| O | -3.893543000 | -0.896712000 | -0.117496000 |
| C | -5.818847000 | -1.284574000 | -1.624227000 |
| O | -7.003769000 | -2.068719000 | -1.737668000 |
| O | -7.415713000 | -0.943225000 | 0.779165000  |
| O | -6.533343000 | 1.584979000  | 1.698691000  |
| O | -4.541582000 | 2.726946000  | 0.113904000  |
| H | -3.859154000 | 0.714875000  | -1.451570000 |
| O | 8.422330000  | 1.240907000  | -0.048460000 |
| O | -2.020404000 | 2.963745000  | -0.361879000 |
| H | 2.714998000  | 4.080065000  | -0.132510000 |
| H | 4.768560000  | 3.729985000  | 0.702858000  |
| H | 4.186469000  | -0.248748000 | -0.828957000 |
| H | 7.206388000  | 3.373039000  | 0.689355000  |
| H | 6.630444000  | -0.603381000 | -0.825663000 |
| H | -2.642629000 | -1.774706000 | -0.457276000 |
| H | 2.028900000  | -3.809458000 | -1.704577000 |
| H | 3.389535000  | -2.869086000 | -2.357871000 |

|   |              |              |              |
|---|--------------|--------------|--------------|
| H | 4.292250000  | -2.520667000 | -0.092694000 |
| H | 4.592903000  | -4.808979000 | 0.386732000  |
| H | 1.916077000  | -4.157452000 | 0.872270000  |
| H | 2.494777000  | -1.192665000 | 1.251443000  |
| H | 0.532347000  | -1.324430000 | 2.375115000  |
| H | 2.863481000  | -3.529446000 | 2.899422000  |
| H | -3.952052000 | 1.324474000  | 1.542008000  |
| H | -6.346508000 | 1.184049000  | -0.319277000 |
| H | -5.635967000 | -0.825582000 | 1.849145000  |
| H | -5.210754000 | -2.397861000 | 0.089863000  |
| H | -6.004641000 | -0.254541000 | -1.947309000 |
| H | -5.078713000 | -1.718316000 | -2.299517000 |
| H | -7.612368000 | -1.755550000 | -1.051972000 |
| H | -7.927070000 | -0.319187000 | 1.309962000  |
| H | -6.496176000 | 2.532904000  | 1.520847000  |
| H | -3.648605000 | 3.092367000  | -0.005867000 |
| H | 8.685397000  | 0.365498000  | -0.358762000 |
| H | -1.328621000 | 3.709080000  | -0.304742000 |

$E = -2061.4561232$  a. u.

$H = -2060.887350$  a. u.

$G = -2060.990828$  a. u.

$f = 43.91i$

Transition state – B ring rotation ( $\varphi_2 = 88.5^\circ$ )

|   |              |              |              |
|---|--------------|--------------|--------------|
| C | -0.752401000 | -0.723789000 | -0.223140000 |
| C | 0.002072000  | -1.905290000 | -0.187291000 |
| C | -0.180136000 | 0.548118000  | -0.283381000 |
| C | 1.414289000  | -1.792608000 | -0.206193000 |
| C | 1.224595000  | 0.611175000  | -0.306678000 |
| C | 2.033179000  | -0.549064000 | -0.271010000 |
| C | -2.761814000 | -1.978268000 | -0.121429000 |
| C | -2.101348000 | -3.156317000 | -0.079473000 |
| O | -2.115956000 | -0.786335000 | -0.196532000 |
| C | -0.657771000 | -3.196024000 | -0.110143000 |
| C | -4.230288000 | -1.798674000 | -0.088610000 |
| C | -4.893057000 | -1.642757000 | 1.133984000  |
| C | -4.962092000 | -1.739433000 | -1.277334000 |
| C | -6.266404000 | -1.435432000 | 1.170422000  |
| C | -6.338026000 | -1.532456000 | -1.249399000 |
| C | -6.990881000 | -1.378420000 | -0.023259000 |
| O | -0.008277000 | -4.269415000 | -0.070230000 |
| C | 3.541255000  | -0.495655000 | -0.204561000 |



|   |              |              |              |
|---|--------------|--------------|--------------|
| C | -1.016483000 | 1.802272000  | -0.340680000 |
| O | 1.785718000  | 1.839230000  | -0.354468000 |
| O | -1.852393000 | 1.745348000  | -1.508087000 |
| C | -2.606705000 | 2.939620000  | -1.699904000 |
| C | -3.543845000 | 3.185307000  | -0.519055000 |
| O | -4.247277000 | 4.400034000  | -0.772096000 |
| C | -2.734270000 | 3.264129000  | 0.768447000  |
| C | -1.874773000 | 2.016670000  | 0.928056000  |
| O | -1.046568000 | 2.231764000  | 2.074226000  |
| H | -0.343529000 | 2.661792000  | -0.423187000 |
| O | -3.657287000 | 3.413452000  | 1.849108000  |
| C | 4.058533000  | -0.376725000 | 1.244305000  |
| C | 5.582994000  | -0.275599000 | 1.227628000  |
| C | 6.023218000  | 0.899211000  | 0.361250000  |
| C | 5.433576000  | 0.810430000  | -1.056518000 |
| O | 4.005470000  | 0.637101000  | -0.970560000 |
| C | 6.076518000  | -0.255976000 | -1.959779000 |
| O | 7.364640000  | 0.157103000  | -2.409250000 |
| O | 7.447255000  | 0.953415000  | 0.243452000  |
| O | 6.111444000  | -0.041366000 | 2.531774000  |
| O | 3.631414000  | -1.456278000 | 2.069264000  |
| H | 3.937844000  | -1.414362000 | -0.646300000 |
| O | -8.336740000 | -1.170069000 | 0.073106000  |
| O | 2.176124000  | -2.904095000 | -0.131193000 |
| H | -2.655419000 | -4.082568000 | -0.020443000 |
| H | -4.332090000 | -1.683179000 | 2.060426000  |
| H | -4.457920000 | -1.855002000 | -2.229657000 |
| H | -6.787061000 | -1.315587000 | 2.112621000  |
| H | -6.901696000 | -1.490548000 | -2.175055000 |
| H | 2.735859000  | 1.739188000  | -0.575350000 |
| H | -1.941181000 | 3.805279000  | -1.826930000 |
| H | -3.181065000 | 2.804624000  | -2.616479000 |
| H | -4.248171000 | 2.346952000  | -0.438220000 |
| H | -4.762222000 | 4.608902000  | 0.016990000  |
| H | -2.076461000 | 4.143422000  | 0.717105000  |
| H | -2.533200000 | 1.159547000  | 1.086553000  |
| H | -0.671185000 | 1.387837000  | 2.350717000  |
| H | -3.148530000 | 3.466594000  | 2.667189000  |
| H | 3.648620000  | 0.530525000  | 1.697673000  |
| H | 5.998619000  | -1.209281000 | 0.825931000  |
| H | 5.653998000  | 1.819012000  | 0.831285000  |
| H | 5.563444000  | 1.773680000  | -1.552329000 |
| H | 6.138066000  | -1.229131000 | -1.460194000 |
| H | 5.447276000  | -0.370102000 | -2.844138000 |

|   |              |              |              |
|---|--------------|--------------|--------------|
| H | 7.886946000  | 0.344666000  | -1.615523000 |
| H | 7.824881000  | 0.861828000  | 1.127413000  |
| H | 5.845318000  | -0.777476000 | 3.096630000  |
| H | 3.609217000  | -2.272076000 | 1.550483000  |
| H | -8.737349000 | -1.142574000 | -0.804417000 |
| H | 1.546856000  | -3.677756000 | -0.098444000 |

$E = -2061.4585911$  a. u.

$H = -2060.889154$  a. u.

$G = -2060.993749$  a. u.

$f = 50.71i$

### 3 Vitexin

#### a Global Minimum Point H-C<sub>7</sub> eclipsed

|   |              |              |              |
|---|--------------|--------------|--------------|
| C | -1.817486000 | 0.177964000  | -0.076723000 |
| C | -3.056682000 | 0.831216000  | -0.136298000 |
| C | -1.674185000 | -1.212473000 | -0.053010000 |
| C | -4.229510000 | 0.032821000  | -0.179477000 |
| C | -2.865964000 | -1.956297000 | -0.105542000 |
| C | -4.126492000 | -1.349358000 | -0.164357000 |
| C | -0.677764000 | 2.263902000  | -0.087740000 |
| C | -1.844770000 | 2.960674000  | -0.151705000 |
| O | -0.668300000 | 0.907807000  | -0.028507000 |
| C | -3.113401000 | 2.283810000  | -0.161861000 |
| C | 0.679483000  | 2.811665000  | -0.096827000 |
| C | 0.937548000  | 4.139729000  | 0.281845000  |
| C | 1.756798000  | 2.003100000  | -0.495747000 |
| C | 2.227613000  | 4.644463000  | 0.262355000  |
| C | 3.050799000  | 2.503406000  | -0.522102000 |
| C | 3.290386000  | 3.827664000  | -0.140438000 |
| O | -4.210599000 | 2.895856000  | -0.210821000 |
| C | -0.328299000 | -1.887200000 | 0.035993000  |
| O | -2.750974000 | -3.309220000 | -0.092727000 |
| C | 0.397306000  | -1.613883000 | 1.370694000  |
| C | 1.754347000  | -2.303565000 | 1.355578000  |
| C | 2.557470000  | -1.867143000 | 0.136603000  |
| C | 1.769076000  | -2.076545000 | -1.170159000 |
| O | 0.489212000  | -1.442348000 | -1.065891000 |
| C | 1.661527000  | -3.545676000 | -1.618779000 |
| O | 2.896207000  | -4.020030000 | -2.155727000 |
| O | 3.786461000  | -2.595814000 | 0.043580000  |
| O | 2.538717000  | -1.968703000 | 2.502111000  |

|   |              |              |              |
|---|--------------|--------------|--------------|
| O | -0.325445000 | -2.162141000 | 2.473996000  |
| H | -0.490618000 | -2.965192000 | -0.031258000 |
| O | 4.534425000  | 4.379045000  | -0.136584000 |
| O | -5.442299000 | 0.609309000  | -0.236318000 |
| H | -1.835671000 | 4.038320000  | -0.227271000 |
| H | 0.130558000  | 4.779803000  | 0.616287000  |
| H | 1.568885000  | 0.981553000  | -0.800300000 |
| H | 2.430875000  | 5.664177000  | 0.565109000  |
| H | 3.873605000  | 1.871742000  | -0.839577000 |
| H | -3.621012000 | -3.723729000 | -0.142141000 |
| H | 0.546707000  | -0.538845000 | 1.502401000  |
| H | 1.597183000  | -3.389791000 | 1.325597000  |
| H | 2.773601000  | -0.797704000 | 0.244670000  |
| H | 2.282328000  | -1.539185000 | -1.970888000 |
| H | 1.325189000  | -4.196933000 | -0.804358000 |
| H | 0.920803000  | -3.597833000 | -2.418810000 |
| H | 3.565126000  | -3.871217000 | -1.471341000 |
| H | 4.203835000  | -2.589741000 | 0.914269000  |
| H | 2.060181000  | -2.265419000 | 3.285595000  |
| H | -1.077605000 | -1.592508000 | 2.671394000  |
| H | 5.192806000  | 3.732172000  | -0.419125000 |
| H | -5.285687000 | 1.591606000  | -0.238943000 |
| H | -5.027128000 | -1.951006000 | -0.200015000 |

$E = -1565.0500957$  a. u.

$H = -1564.628745$  a. u.

$G = -1564.714904$  a. u.

#### **b** H-C<sub>9</sub> eclipsed

|   |              |              |              |
|---|--------------|--------------|--------------|
| C | -0.511811000 | 1.659915000  | -0.079828000 |
| C | -1.228255000 | 2.865043000  | -0.135438000 |
| C | 0.884408000  | 1.586888000  | -0.100189000 |
| C | -0.492248000 | 4.074615000  | -0.223278000 |
| C | 1.565729000  | 2.814847000  | -0.199321000 |
| C | 0.892978000  | 4.040017000  | -0.258541000 |
| C | -2.544577000 | 0.423323000  | 0.029251000  |
| C | -3.294567000 | 1.558074000  | -0.000583000 |
| O | -1.186881000 | 0.474070000  | -0.007167000 |
| C | -2.680783000 | 2.853881000  | -0.097334000 |
| C | -3.044507000 | -0.950972000 | 0.109269000  |
| C | -4.363740000 | -1.263978000 | -0.262943000 |
| C | -2.212307000 | -1.989836000 | 0.557457000  |
| C | -4.836713000 | -2.563361000 | -0.186002000 |

|   |              |              |              |
|---|--------------|--------------|--------------|
| C | -2.680064000 | -3.293771000 | 0.641206000  |
| C | -3.995857000 | -3.585543000 | 0.268103000  |
| O | -3.346610000 | 3.919562000  | -0.137217000 |
| C | 1.587584000  | 0.255751000  | -0.032198000 |
| O | 2.920944000  | 2.773624000  | -0.236426000 |
| C | 2.540959000  | 0.116120000  | 1.171895000  |
| C | 3.206671000  | -1.251462000 | 1.123328000  |
| C | 3.890671000  | -1.461175000 | -0.222338000 |
| C | 2.920482000  | -1.235318000 | -1.396092000 |
| O | 2.303941000  | 0.050815000  | -1.265596000 |
| C | 1.889574000  | -2.362409000 | -1.596822000 |
| O | 2.488179000  | -3.520967000 | -2.178082000 |
| O | 4.420260000  | -2.787978000 | -0.326043000 |
| O | 4.217848000  | -1.392971000 | 2.123519000  |
| O | 1.817620000  | 0.172790000  | 2.403918000  |
| H | 0.825464000  | -0.517369000 | 0.081186000  |
| O | -4.514865000 | -4.841932000 | 0.320647000  |
| O | -1.128431000 | 5.256970000  | -0.274720000 |
| H | -4.371418000 | 1.504894000  | 0.063689000  |
| H | -5.023309000 | -0.492322000 | -0.639437000 |
| H | -1.195429000 | -1.775695000 | 0.857646000  |
| H | -5.849458000 | -2.804945000 | -0.483902000 |
| H | -2.028320000 | -4.084534000 | 0.996525000  |
| H | 3.284710000  | 3.667489000  | -0.260282000 |
| H | 3.309237000  | 0.891198000  | 1.136640000  |
| H | 2.438673000  | -2.022049000 | 1.270476000  |
| H | 4.704701000  | -0.730836000 | -0.304333000 |
| H | 3.504231000  | -1.175060000 | -2.317173000 |
| H | 1.382544000  | -2.625589000 | -0.661830000 |
| H | 1.133823000  | -2.003826000 | -2.298106000 |
| H | 3.223960000  | -3.767964000 | -1.598833000 |
| H | 4.903714000  | -2.981142000 | 0.487105000  |
| H | 3.797105000  | -1.297495000 | 2.986401000  |
| H | 1.569120000  | 1.087545000  | 2.579580000  |
| H | -3.852597000 | -5.469418000 | 0.636053000  |
| H | -2.101572000 | 5.053309000  | -0.236919000 |
| H | 1.447022000  | 4.968051000  | -0.334752000 |

$E = -1565.0477395$  a. u.

$H = -1564.626232$  a. u.

$G = -1564.712329$  a. u.

**c** Gauche-like

|   |              |              |              |
|---|--------------|--------------|--------------|
| C | 0.513894000  | 1.706897000  | 0.013800000  |
| C | 0.452219000  | 3.101568000  | -0.112195000 |
| C | 1.709554000  | 0.975688000  | 0.057543000  |
| C | 1.674529000  | 3.818336000  | -0.182886000 |
| C | 2.887545000  | 1.738806000  | -0.006255000 |
| C | 2.876459000  | 3.133496000  | -0.121189000 |
| C | -1.861535000 | 1.582011000  | 0.069089000  |
| C | -1.988282000 | 2.930096000  | -0.055579000 |
| O | -0.641861000 | 0.981302000  | 0.091883000  |
| C | -0.833650000 | 3.777841000  | -0.164515000 |
| C | -2.958177000 | 0.622032000  | 0.209780000  |
| C | -4.228673000 | 0.892097000  | -0.326239000 |
| C | -2.762223000 | -0.586666000 | 0.894574000  |
| C | -5.267059000 | -0.013731000 | -0.182760000 |
| C | -3.798101000 | -1.496967000 | 1.047801000  |
| C | -5.056034000 | -1.213326000 | 0.506410000  |
| O | -0.914044000 | 5.026823000  | -0.278806000 |
| C | 1.615246000  | -0.532019000 | 0.096215000  |
| O | 4.077759000  | 1.080884000  | 0.068111000  |
| C | 2.817886000  | -1.328979000 | 0.624979000  |
| C | 2.433286000  | -2.804163000 | 0.638798000  |
| C | 2.045355000  | -3.250556000 | -0.767376000 |
| C | 0.956403000  | -2.349703000 | -1.379204000 |
| O | 1.340813000  | -0.973517000 | -1.255521000 |
| C | -0.461101000 | -2.613107000 | -0.840180000 |
| O | -1.016813000 | -3.806901000 | -1.391793000 |
| O | 1.564227000  | -4.599378000 | -0.767463000 |
| O | 3.523852000  | -3.633070000 | 1.042327000  |
| O | 3.163904000  | -0.963941000 | 1.958991000  |
| H | 0.763437000  | -0.778643000 | 0.738013000  |
| O | -6.113160000 | -2.063429000 | 0.613211000  |
| O | 1.675745000  | 5.156389000  | -0.302452000 |
| H | -2.966398000 | 3.388616000  | -0.039652000 |
| H | -4.401831000 | 1.804966000  | -0.882591000 |
| H | -1.795507000 | -0.808714000 | 1.325267000  |
| H | -6.242952000 | 0.186918000  | -0.607269000 |
| H | -3.632775000 | -2.423220000 | 1.586926000  |
| H | 4.814782000  | 1.702373000  | 0.019109000  |
| H | 3.670925000  | -1.200274000 | -0.042329000 |
| H | 1.588602000  | -2.951441000 | 1.325320000  |
| H | 2.942636000  | -3.179576000 | -1.393952000 |
| H | 0.921546000  | -2.533239000 | -2.455189000 |
| H | -0.479005000 | -2.659094000 | 0.254113000  |
| H | -1.099667000 | -1.785856000 | -1.151658000 |

|   |              |              |              |
|---|--------------|--------------|--------------|
| H | -0.399372000 | -4.520196000 | -1.174221000 |
| H | 2.194203000  | -5.143491000 | -0.278862000 |
| H | 3.808784000  | -3.336583000 | 1.915560000  |
| H | 3.756650000  | -0.204253000 | 1.904258000  |
| H | -5.860410000 | -2.861822000 | 1.093361000  |
| H | 0.721366000  | 5.436538000  | -0.322995000 |
| H | 3.806357000  | 3.687785000  | -0.164777000 |

$E = -1565.0477285$  a. u.

$H = -1564.625878$  a. u.

$G = -1564.710500$  a. u.

Transition state - 8-C bond rotation ( $\varphi_1 = 20.6^\circ$ )

|   |              |              |              |
|---|--------------|--------------|--------------|
| C | -0.464917000 | 1.634763000  | -0.032041000 |
| C | -1.130635000 | 2.864797000  | 0.134616000  |
| C | 0.923283000  | 1.487778000  | -0.203872000 |
| C | -0.364896000 | 4.053639000  | 0.067558000  |
| C | 1.597508000  | 2.722333000  | -0.434695000 |
| C | 0.974285000  | 3.964220000  | -0.246398000 |
| C | -2.597061000 | 0.516234000  | 0.014136000  |
| C | -3.271914000 | 1.672498000  | 0.215643000  |
| O | -1.231044000 | 0.491487000  | -0.059022000 |
| C | -2.570873000 | 2.921498000  | 0.320685000  |
| C | -3.191070000 | -0.811147000 | -0.160711000 |
| C | -4.401018000 | -1.142215000 | 0.473470000  |
| C | -2.578208000 | -1.767660000 | -0.985414000 |
| C | -4.979569000 | -2.387207000 | 0.291310000  |
| C | -3.155755000 | -3.015070000 | -1.177079000 |
| C | -4.358441000 | -3.329600000 | -0.536421000 |
| O | -3.166931000 | 4.009691000  | 0.519148000  |
| C | 1.663641000  | 0.125689000  | -0.216394000 |
| O | 2.873396000  | 2.743922000  | -0.892636000 |
| C | 1.303100000  | -0.920374000 | 0.894029000  |
| C | 2.353419000  | -2.042690000 | 0.946912000  |
| C | 3.784733000  | -1.554163000 | 1.012883000  |
| C | 4.026632000  | -0.548801000 | -0.114245000 |
| O | 3.035803000  | 0.466731000  | 0.005350000  |
| C | 4.114809000  | -1.155401000 | -1.524666000 |
| O | 5.345487000  | -1.855876000 | -1.708680000 |
| O | 4.706380000  | -2.643829000 | 0.884259000  |
| O | 2.145669000  | -2.869829000 | 2.093868000  |
| O | 0.107982000  | -1.666439000 | 0.696958000  |
| H | 1.524539000  | -0.352213000 | -1.195480000 |

|   |              |              |              |
|---|--------------|--------------|--------------|
| O | -4.972338000 | -4.535635000 | -0.673899000 |
| O | -0.929679000 | 5.258492000  | 0.254321000  |
| H | -4.351743000 | 1.675823000  | 0.248116000  |
| H | -4.880115000 | -0.429878000 | 1.133815000  |
| H | -1.648878000 | -1.531597000 | -1.486778000 |
| H | -5.903860000 | -2.650106000 | 0.790596000  |
| H | -2.677770000 | -3.742662000 | -1.823735000 |
| H | 3.135688000  | 3.661213000  | -1.040688000 |
| H | 1.286995000  | -0.398689000 | 1.859115000  |
| H | 2.226934000  | -2.648461000 | 0.040560000  |
| H | 3.940815000  | -1.044458000 | 1.970756000  |
| H | 4.971920000  | -0.031196000 | 0.064478000  |
| H | 3.266174000  | -1.813011000 | -1.742838000 |
| H | 4.098257000  | -0.336575000 | -2.246444000 |
| H | 5.402762000  | -2.503841000 | -0.990842000 |
| H | 4.428273000  | -3.344482000 | 1.487480000  |
| H | 1.249145000  | -3.223213000 | 2.037993000  |
| H | -0.638977000 | -1.062141000 | 0.714968000  |
| H | -4.458543000 | -5.115419000 | -1.249862000 |
| H | -1.896856000 | 5.090392000  | 0.416292000  |
| H | 1.545127000  | 4.876073000  | -0.380696000 |

$E = -1565.0210634$  a. u.

$H = -1564.601085$  a. u.

$G = -1564.683936$  a. u.

$f = 47.73i$

Transition state - 8-C bond rotation ( $\varphi_1 = -165.6^\circ$ )

|   |              |              |              |
|---|--------------|--------------|--------------|
| C | -0.523712000 | 1.703908000  | -0.136675000 |
| C | -0.514690000 | 3.098558000  | 0.080386000  |
| C | -1.702276000 | 0.950627000  | -0.374026000 |
| C | -1.731022000 | 3.816465000  | -0.011787000 |
| C | -2.846193000 | 1.754920000  | -0.558707000 |
| C | -2.879246000 | 3.136611000  | -0.363455000 |
| C | 1.855950000  | 1.671819000  | 0.102445000  |
| C | 1.920144000  | 3.004867000  | 0.367490000  |
| O | 0.677322000  | 1.060307000  | -0.151118000 |
| C | 0.730969000  | 3.798668000  | 0.366177000  |
| C | 2.984214000  | 0.738215000  | 0.037999000  |
| C | 4.262124000  | 1.096762000  | 0.502717000  |
| C | 2.805125000  | -0.549217000 | -0.492189000 |
| C | 5.319145000  | 0.204219000  | 0.437363000  |
| C | 3.858883000  | -1.448788000 | -0.564403000 |

|   |              |              |              |
|---|--------------|--------------|--------------|
| C | 5.122883000  | -1.074064000 | -0.098401000 |
| O | 0.748103000  | 5.039324000  | 0.585386000  |
| C | -1.742206000 | -0.600138000 | -0.476231000 |
| O | -4.004744000 | 1.163292000  | -0.981651000 |
| C | -2.921885000 | -1.311537000 | 0.280943000  |
| C | -2.646202000 | -2.803138000 | 0.529233000  |
| C | -1.259208000 | -3.106422000 | 1.048668000  |
| C | -0.230287000 | -2.449524000 | 0.127945000  |
| O | -0.511655000 | -1.053234000 | 0.096825000  |
| C | -0.109369000 | -3.077929000 | -1.271005000 |
| O | 0.539170000  | -4.347617000 | -1.211314000 |
| O | -1.022127000 | -4.519261000 | 1.087939000  |
| O | -3.576580000 | -3.330989000 | 1.478425000  |
| O | -4.151079000 | -1.366141000 | -0.435330000 |
| H | -1.806307000 | -0.885667000 | -1.535200000 |
| O | 6.199611000  | -1.905234000 | -0.134809000 |
| O | -1.778415000 | 5.140777000  | 0.202319000  |
| H | 2.865101000  | 3.493318000  | 0.551896000  |
| H | 4.437438000  | 2.073449000  | 0.935405000  |
| H | 1.828018000  | -0.837876000 | -0.849277000 |
| H | 6.301018000  | 0.478279000  | 0.803001000  |
| H | 3.701470000  | -2.438504000 | -0.979347000 |
| H | -4.709139000 | 1.817925000  | -1.069328000 |
| H | -3.052100000 | -0.816483000 | 1.251852000  |
| H | -2.781719000 | -3.321179000 | -0.427492000 |
| H | -1.146021000 | -2.680610000 | 2.052436000  |
| H | 0.755700000  | -2.518249000 | 0.593324000  |
| H | -1.083292000 | -3.165874000 | -1.764841000 |
| H | 0.513699000  | -2.427945000 | -1.888476000 |
| H | 0.055876000  | -4.873930000 | -0.556710000 |
| H | -1.784488000 | -4.938303000 | 1.506995000  |
| H | -4.461942000 | -3.223042000 | 1.109855000  |
| H | -4.418445000 | -0.457706000 | -0.634513000 |
| H | 5.956567000  | -2.759643000 | -0.512753000 |
| H | -0.841597000 | 5.419219000  | 0.406708000  |
| H | -3.805538000 | 3.683739000  | -0.493857000 |

$E = -1565.0282287$  a. u.

$H = -1564.608119$  a. u.

$G = -1564.690790$  a. u.

$f = 47.34i$

Transition state – B ring rotation ( $\varphi_2 = 89.2^\circ$ )



|   |              |              |              |
|---|--------------|--------------|--------------|
| C | -1.797012000 | 0.361954000  | -0.054259000 |
| C | -2.952485000 | 1.154979000  | -0.139537000 |
| C | -1.819856000 | -1.032562000 | 0.042805000  |
| C | -4.212517000 | 0.498245000  | -0.126293000 |
| C | -3.091180000 | -1.631111000 | 0.047707000  |
| C | -4.272182000 | -0.882373000 | -0.030733000 |
| C | -0.432596000 | 2.300607000  | -0.148817000 |
| C | -1.497855000 | 3.126204000  | -0.239081000 |
| O | -0.565727000 | 0.952180000  | -0.061714000 |
| C | -2.844341000 | 2.599582000  | -0.240134000 |
| C | 0.990723000  | 2.705494000  | -0.126595000 |
| C | 1.634450000  | 2.950918000  | 1.091518000  |
| C | 1.716482000  | 2.801704000  | -1.316528000 |
| C | 2.980213000  | 3.294641000  | 1.121528000  |
| C | 3.064924000  | 3.145180000  | -1.295196000 |
| C | 3.697757000  | 3.392151000  | -0.073784000 |
| O | -3.857566000 | 3.334337000  | -0.320191000 |
| C | -0.557533000 | -1.855911000 | 0.101432000  |
| O | -3.137729000 | -2.984711000 | 0.133259000  |
| C | 0.303251000  | -1.569376000 | 1.352202000  |
| C | 1.596618000  | -2.366259000 | 1.274967000  |
| C | 2.316314000  | -2.070272000 | -0.034415000 |
| C | 1.408511000  | -2.334417000 | -1.248379000 |
| O | 0.190765000  | -1.596317000 | -1.103696000 |
| C | 1.154622000  | -3.823455000 | -1.545470000 |
| O | 2.306881000  | -4.450098000 | -2.110057000 |
| O | 3.493676000  | -2.875378000 | -0.165757000 |
| O | 2.500468000  | -2.020887000 | 2.327238000  |
| O | -0.370649000 | -1.991480000 | 2.539771000  |
| H | -0.843093000 | -2.909603000 | 0.144196000  |
| O | 5.016535000  | 3.733877000  | 0.016265000  |
| O | -5.351109000 | 1.207561000  | -0.205675000 |
| H | -1.347863000 | 4.194501000  | -0.308214000 |
| H | 1.080221000  | 2.873091000  | 2.019617000  |
| H | 1.228870000  | 2.607421000  | -2.264653000 |
| H | 3.484883000  | 3.489412000  | 2.059932000  |
| H | 3.622909000  | 3.220282000  | -2.222257000 |
| H | -4.051908000 | -3.293916000 | 0.120579000  |
| H | 0.551519000  | -0.507358000 | 1.407249000  |
| H | 1.359571000  | -3.436148000 | 1.334601000  |
| H | 2.592141000  | -1.008547000 | -0.036897000 |
| H | 1.889073000  | -1.911726000 | -2.133589000 |
| H | 0.823822000  | -4.366940000 | -0.653087000 |
| H | 0.357895000  | -3.884579000 | -2.289080000 |

|   |              |              |              |
|---|--------------|--------------|--------------|
| H | 3.037206000  | -4.283026000 | -1.496004000 |
| H | 3.975583000  | -2.835058000 | 0.670121000  |
| H | 2.075175000  | -2.234802000 | 3.166353000  |
| H | -1.049445000 | -1.343920000 | 2.761438000  |
| H | 5.414936000  | 3.773878000  | -0.861731000 |
| H | -5.086065000 | 2.162735000  | -0.268209000 |
| H | -5.237626000 | -1.373915000 | -0.023566000 |

$E = -1565.0411556$  a. u.

$H = -1564.620862$  a. u.

$G = -1564.705471$  a. u.

$f = 55.29i$

#### 4 Puerarin

##### a Global Minimum Point H-C<sub>7</sub> eclipsed

|   |              |              |              |
|---|--------------|--------------|--------------|
| C | -0.008094000 | 1.182700000  | -0.074885000 |
| C | 1.041306000  | 2.105421000  | -0.172654000 |
| C | -1.362042000 | 1.560080000  | -0.076595000 |
| C | 0.712571000  | 3.468002000  | -0.277759000 |
| C | -1.635836000 | 2.927905000  | -0.182230000 |
| C | -0.600498000 | 3.878452000  | -0.280693000 |
| C | 1.534468000  | -0.581788000 | 0.050642000  |
| C | 2.629655000  | 0.205691000  | -0.062116000 |
| O | 0.256233000  | -0.151469000 | 0.036767000  |
| C | 2.442773000  | 1.659969000  | -0.174195000 |
| C | 3.978839000  | -0.404198000 | -0.080844000 |
| C | 5.022425000  | 0.118768000  | 0.699246000  |
| C | 4.243481000  | -1.534886000 | -0.864060000 |
| C | 6.277364000  | -0.476032000 | 0.709494000  |
| C | 5.497955000  | -2.140670000 | -0.860772000 |
| C | 6.518765000  | -1.610278000 | -0.070440000 |
| O | 3.382565000  | 2.454776000  | -0.271057000 |
| C | -2.482640000 | 0.552633000  | 0.018318000  |
| O | -2.938768000 | 3.312552000  | -0.186688000 |
| C | -2.491550000 | -0.227488000 | 1.350215000  |
| C | -3.612248000 | -1.257609000 | 1.321239000  |
| C | -3.477687000 | -2.149170000 | 0.092872000  |
| C | -3.407873000 | -1.324717000 | -1.205163000 |
| O | -2.364602000 | -0.349815000 | -1.096830000 |
| C | -4.746814000 | -0.700603000 | -1.640027000 |
| O | -5.633745000 | -1.683315000 | -2.174722000 |
| O | -4.583505000 | -3.053448000 | -0.008175000 |

|   |              |              |              |
|---|--------------|--------------|--------------|
| O | -3.574512000 | -2.119917000 | 2.459851000  |
| O | -2.762373000 | 0.642400000  | 2.450884000  |
| H | -3.427371000 | 1.097423000  | -0.040384000 |
| O | 7.775653000  | -2.150069000 | -0.021578000 |
| H | 4.846970000  | 0.997498000  | 1.305620000  |
| H | 3.465331000  | -1.942974000 | -1.499294000 |
| H | 7.078473000  | -0.073333000 | 1.317919000  |
| H | -1.540402000 | -0.745554000 | 1.491740000  |
| H | -4.575341000 | -0.731801000 | 1.293704000  |
| H | -2.543967000 | -2.716583000 | 0.189194000  |
| H | -3.089941000 | -1.985961000 | -2.014177000 |
| H | -5.230231000 | -0.157198000 | -0.820431000 |
| H | -4.538423000 | 0.013412000  | -2.438942000 |
| H | -5.723551000 | -2.368420000 | -1.496016000 |
| H | -4.719921000 | -3.457112000 | 0.858321000  |
| H | -3.694411000 | -1.576390000 | 3.247902000  |
| H | -1.959291000 | 1.124914000  | 2.677155000  |
| H | 7.830663000  | -2.922470000 | -0.597003000 |
| H | -0.849945000 | 4.930369000  | -0.362772000 |
| H | 1.575916000  | -1.656423000 | 0.166726000  |
| H | 5.683103000  | -3.013301000 | -1.478305000 |
| H | 1.519190000  | 4.185872000  | -0.355072000 |
| H | -3.008359000 | 4.271392000  | -0.271064000 |

$E = -1489.7767295$  a. u.

$H = -1489.360348$  a. u.

$G = -1489.444911$  a. u.

#### **b** H-C<sub>9</sub> eclipsed

|   |              |              |              |
|---|--------------|--------------|--------------|
| C | -0.163389000 | 0.945726000  | -0.128360000 |
| C | -1.165023000 | 1.918478000  | -0.248443000 |
| C | 1.208650000  | 1.247617000  | -0.146385000 |
| C | -0.765450000 | 3.256606000  | -0.397291000 |
| C | 1.554268000  | 2.596075000  | -0.303755000 |
| C | 0.568302000  | 3.594083000  | -0.426903000 |
| C | -1.798006000 | -0.733810000 | 0.039770000  |
| C | -2.850176000 | 0.112849000  | -0.044401000 |
| O | -0.498001000 | -0.371569000 | 0.013333000  |
| C | -2.587901000 | 1.550188000  | -0.211391000 |
| C | -4.231681000 | -0.412394000 | 0.044008000  |
| C | -5.215871000 | -0.018064000 | -0.876143000 |
| C | -4.587918000 | -1.330974000 | 1.039200000  |
| C | -6.503051000 | -0.535512000 | -0.814601000 |

|   |              |              |              |
|---|--------------|--------------|--------------|
| C | -5.876000000 | -1.857119000 | 1.110573000  |
| C | -6.836960000 | -1.458925000 | 0.180035000  |
| O | -3.485693000 | 2.392402000  | -0.304088000 |
| C | 2.239483000  | 0.152004000  | -0.012535000 |
| C | 3.158741000  | 0.325922000  | 1.214248000  |
| C | 4.195771000  | -0.788477000 | 1.225807000  |
| C | 4.946056000  | -0.824714000 | -0.100196000 |
| C | 3.983067000  | -0.933706000 | -1.296178000 |
| O | 3.013079000  | 0.117999000  | -1.225656000 |
| C | 3.331031000  | -2.318295000 | -1.468658000 |
| O | 4.259178000  | -3.274073000 | -1.981773000 |
| O | 5.849049000  | -1.935161000 | -0.148127000 |
| O | 5.176704000  | -0.595318000 | 2.246908000  |
| O | 2.413482000  | 0.207460000  | 2.428503000  |
| H | 1.712575000  | -0.795534000 | 0.117541000  |
| O | -8.121954000 | -1.930376000 | 0.192728000  |
| H | -4.967354000 | 0.697431000  | -1.648883000 |
| H | -3.855890000 | -1.630727000 | 1.780677000  |
| H | -7.258448000 | -0.234556000 | -1.530773000 |
| H | 3.673200000  | 1.287693000  | 1.167285000  |
| H | 3.685769000  | -1.746828000 | 1.387308000  |
| H | 5.507323000  | 0.112631000  | -0.196057000 |
| H | 4.547084000  | -0.733901000 | -2.209816000 |
| H | 2.888320000  | -2.681095000 | -0.534153000 |
| H | 2.529850000  | -2.220870000 | -2.203616000 |
| H | 5.017225000  | -3.269721000 | -1.378956000 |
| H | 6.346666000  | -1.952032000 | 0.679174000  |
| H | 4.724560000  | -0.606905000 | 3.099041000  |
| H | 1.944981000  | 1.033947000  | 2.591186000  |
| H | -8.240262000 | -2.559809000 | 0.914192000  |
| H | 0.873694000  | 4.627589000  | -0.547317000 |
| H | -1.895725000 | -1.806707000 | 0.136519000  |
| H | -6.133423000 | -2.563170000 | 1.893161000  |
| O | 2.872267000  | 2.917220000  | -0.333667000 |
| H | 2.983770000  | 3.873631000  | -0.402814000 |
| H | -1.532458000 | 4.014909000  | -0.489390000 |

$E = -1489.7761858$  a. u.

$H = -1489.359776$  a. u.

$G = -1489.444391$  a. u.

#### c Gauche-like

|   |              |             |              |
|---|--------------|-------------|--------------|
| C | -0.004962000 | 1.135967000 | -0.031697000 |
|---|--------------|-------------|--------------|

|   |              |              |              |
|---|--------------|--------------|--------------|
| C | -1.011703000 | 2.090517000  | -0.210186000 |
| C | 1.370559000  | 1.442642000  | -0.025476000 |
| C | -0.620492000 | 3.428241000  | -0.387042000 |
| C | 1.701539000  | 2.789111000  | -0.195814000 |
| C | 0.710134000  | 3.774032000  | -0.376442000 |
| C | -1.621189000 | -0.554455000 | 0.169720000  |
| C | -2.681163000 | 0.274575000  | 0.025008000  |
| O | -0.325778000 | -0.177670000 | 0.153364000  |
| C | -2.431548000 | 1.706531000  | -0.196433000 |
| C | -4.057788000 | -0.264249000 | 0.107556000  |
| C | -5.029440000 | 0.080805000  | -0.844919000 |
| C | -4.421211000 | -1.147193000 | 1.132125000  |
| C | -6.311198000 | -0.450465000 | -0.785977000 |
| C | -5.703745000 | -1.686666000 | 1.201188000  |
| C | -6.652070000 | -1.338183000 | 0.238297000  |
| O | -3.334781000 | 2.534098000  | -0.347131000 |
| C | 2.332540000  | 0.283354000  | 0.130453000  |
| C | 3.790204000  | 0.574538000  | 0.518251000  |
| C | 4.510794000  | -0.761331000 | 0.671729000  |
| C | 4.409322000  | -1.570278000 | -0.617259000 |
| C | 2.951834000  | -1.716941000 | -1.090564000 |
| O | 2.333914000  | -0.424117000 | -1.129807000 |
| C | 2.121077000  | -2.742836000 | -0.297089000 |
| O | 2.471243000  | -4.080889000 | -0.652857000 |
| O | 4.962549000  | -2.880387000 | -0.449241000 |
| O | 5.903574000  | -0.584214000 | 0.932582000  |
| O | 3.894275000  | 1.252726000  | 1.767538000  |
| H | 1.915959000  | -0.361705000 | 0.911384000  |
| O | -7.931205000 | -1.825293000 | 0.247028000  |
| H | -4.775613000 | 0.768859000  | -1.640485000 |
| H | -3.699507000 | -1.407827000 | 1.898123000  |
| H | -7.056985000 | -0.187311000 | -1.526682000 |
| H | 4.277450000  | 1.146231000  | -0.273856000 |
| H | 4.052919000  | -1.321077000 | 1.498045000  |
| H | 4.968158000  | -1.030372000 | -1.391252000 |
| H | 2.958436000  | -2.054941000 | -2.128912000 |
| H | 2.218702000  | -2.600425000 | 0.784798000  |
| H | 1.072465000  | -2.600817000 | -0.561991000 |
| H | 3.422009000  | -4.165888000 | -0.490551000 |
| H | 5.832283000  | -2.790042000 | -0.040345000 |
| H | 5.986387000  | -0.059172000 | 1.738185000  |
| H | 3.793575000  | 2.195964000  | 1.586558000  |
| H | -8.055531000 | -2.425338000 | 0.992164000  |
| H | 1.012213000  | 4.807149000  | -0.507350000 |

|   |              |              |              |
|---|--------------|--------------|--------------|
| H | -1.708778000 | -1.623295000 | 0.311009000  |
| H | -5.967110000 | -2.364242000 | 2.006587000  |
| O | 3.016517000  | 3.149273000  | -0.166962000 |
| H | 3.110898000  | 4.102431000  | -0.288038000 |
| H | -1.389353000 | 4.177298000  | -0.526058000 |

$E = -1489.7760101$  a. u.

$H = -1489.359362$  a. u.

$G = -1489.442978$  a. u.

Transition state - 8-C bond rotation ( $\varphi_1 = 17.6^\circ$ )

|   |              |              |              |
|---|--------------|--------------|--------------|
| C | 0.159407000  | 0.978852000  | -0.032791000 |
| C | 1.159054000  | 1.908418000  | -0.357165000 |
| C | -1.227594000 | 1.260074000  | -0.005695000 |
| C | 0.768076000  | 3.219979000  | -0.654378000 |
| C | -1.540551000 | 2.630843000  | -0.188181000 |
| C | -0.550870000 | 3.570027000  | -0.554703000 |
| C | 1.866284000  | -0.626583000 | 0.386119000  |
| C | 2.894631000  | 0.179555000  | 0.054163000  |
| O | 0.552585000  | -0.288405000 | 0.323427000  |
| C | 2.586013000  | 1.550560000  | -0.374250000 |
| C | 4.285420000  | -0.322278000 | 0.116741000  |
| C | 5.302427000  | 0.440597000  | 0.711975000  |
| C | 4.618219000  | -1.580961000 | -0.399275000 |
| C | 6.601024000  | -0.042635000 | 0.801444000  |
| C | 5.917231000  | -2.076347000 | -0.313692000 |
| C | 6.912583000  | -1.304714000 | 0.288164000  |
| O | 3.454761000  | 2.355076000  | -0.720413000 |
| C | -2.308591000 | 0.182209000  | 0.285353000  |
| O | -2.791262000 | 3.116601000  | 0.012092000  |
| C | -2.208588000 | -1.178664000 | -0.489179000 |
| C | -3.533839000 | -1.959637000 | -0.446423000 |
| C | -4.764221000 | -1.133271000 | -0.751918000 |
| C | -4.763058000 | 0.112301000  | 0.135871000  |
| O | -3.537817000 | 0.796430000  | -0.099822000 |
| C | -5.041917000 | -0.141043000 | 1.626982000  |
| O | -6.410892000 | -0.481683000 | 1.846211000  |
| O | -5.959237000 | -1.886764000 | -0.511689000 |
| O | -3.508798000 | -3.036075000 | -1.386965000 |
| O | -1.306238000 | -2.133305000 | 0.062470000  |
| H | -2.295089000 | -0.042574000 | 1.360761000  |
| O | 8.209727000  | -1.724859000 | 0.399932000  |
| H | 5.071629000  | 1.419573000  | 1.110880000  |

|   |              |              |              |
|---|--------------|--------------|--------------|
| H | 3.859135000  | -2.179940000 | -0.889708000 |
| H | 7.382730000  | 0.546335000  | 1.266248000  |
| H | -1.960973000 | -0.961945000 | -1.535914000 |
| H | -3.633342000 | -2.371455000 | 0.565079000  |
| H | -4.730237000 | -0.810717000 | -1.799053000 |
| H | -5.533598000 | 0.801995000  | -0.216488000 |
| H | -4.384630000 | -0.913209000 | 2.042645000  |
| H | -4.849352000 | 0.787172000  | 2.168504000  |
| H | -6.607960000 | -1.224739000 | 1.256460000  |
| H | -5.861275000 | -2.747280000 | -0.938602000 |
| H | -2.780692000 | -3.620623000 | -1.143288000 |
| H | -0.429557000 | -1.737799000 | 0.078033000  |
| H | 8.312768000  | -2.599791000 | 0.006632000  |
| H | -0.858876000 | 4.594727000  | -0.734710000 |
| H | 1.982564000  | -1.642240000 | 0.739517000  |
| H | 6.156659000  | -3.052137000 | -0.723085000 |
| H | 1.525985000  | 3.942546000  | -0.926338000 |
| H | -2.775358000 | 4.072278000  | -0.124492000 |

$E = -1489.7509572$  a. u.

$H = -1489.336085$  a. u.

$G = -1489.418230$  a. u.

$f = 51.69i$

Transition state - 8-C bond rotation ( $\varphi_1 = -167.0^\circ$ )

|   |              |              |              |
|---|--------------|--------------|--------------|
| C | 0.045475000  | 1.100353000  | -0.251417000 |
| C | 1.062649000  | 2.061804000  | -0.100244000 |
| C | -1.337935000 | 1.436512000  | -0.350128000 |
| C | 0.722789000  | 3.419986000  | -0.120837000 |
| C | -1.580190000 | 2.814218000  | -0.461828000 |
| C | -0.579869000 | 3.791104000  | -0.327060000 |
| C | 1.697045000  | -0.583391000 | -0.231042000 |
| C | 2.751389000  | 0.244406000  | -0.043884000 |
| O | 0.413227000  | -0.209411000 | -0.343906000 |
| C | 2.480096000  | 1.679265000  | 0.047024000  |
| C | 4.124929000  | -0.300069000 | 0.041948000  |
| C | 5.015320000  | 0.135457000  | 1.036284000  |
| C | 4.565875000  | -1.284251000 | -0.852003000 |
| C | 6.290727000  | -0.403765000 | 1.144139000  |
| C | 5.842087000  | -1.833707000 | -0.752319000 |
| C | 6.707980000  | -1.392992000 | 0.249800000  |
| O | 3.364608000  | 2.525618000  | 0.215083000  |
| C | -2.480638000 | 0.384360000  | -0.405714000 |

|   |              |              |              |
|---|--------------|--------------|--------------|
| O | -2.847940000 | 3.248404000  | -0.740455000 |
| C | -3.741585000 | 0.646390000  | 0.493015000  |
| C | -4.600094000 | -0.621843000 | 0.632232000  |
| C | -3.823299000 | -1.870781000 | 0.986543000  |
| C | -2.664111000 | -2.035410000 | 0.001033000  |
| O | -1.895052000 | -0.837690000 | 0.044598000  |
| C | -3.067869000 | -2.447364000 | -1.424273000 |
| O | -3.481847000 | -3.812978000 | -1.468453000 |
| O | -4.661744000 | -3.031496000 | 0.929406000  |
| O | -5.589975000 | -0.444709000 | 1.648590000  |
| O | -4.689420000 | 1.575938000  | -0.017964000 |
| H | -2.819296000 | 0.303044000  | -1.447969000 |
| O | 7.976302000  | -1.884810000 | 0.403161000  |
| H | 4.702214000  | 0.901040000  | 1.733720000  |
| H | 3.911633000  | -1.620100000 | -1.648713000 |
| H | 6.972180000  | -0.069024000 | 1.917286000  |
| H | -3.389978000 | 0.946867000  | 1.488655000  |
| H | -5.100709000 | -0.780529000 | -0.330606000 |
| H | -3.406967000 | -1.760310000 | 1.994624000  |
| H | -1.986537000 | -2.807693000 | 0.372545000  |
| H | -3.849900000 | -1.798064000 | -1.833477000 |
| H | -2.188094000 | -2.355345000 | -2.064219000 |
| H | -4.179052000 | -3.910515000 | -0.802820000 |
| H | -5.476200000 | -2.835735000 | 1.409668000  |
| H | -6.135668000 | 0.309945000  | 1.395147000  |
| H | -4.229345000 | 2.406717000  | -0.205159000 |
| H | 8.157072000  | -2.557170000 | -0.264662000 |
| H | -0.855481000 | 4.838043000  | -0.392671000 |
| H | 1.786550000  | -1.659366000 | -0.304881000 |
| H | 6.165273000  | -2.592147000 | -1.457648000 |
| H | 1.507391000  | 4.155127000  | -0.001091000 |
| H | -2.874989000 | 4.212601000  | -0.785823000 |

$E = -1489.7552978$  a. u.

$H = -1489.340410$  a. u.

$G = -1489.422057$  a. u.

$f = 51.95i$

Transition state – B ring rotation ( $\varphi_2 = 179.8^\circ$ )

|   |              |             |              |
|---|--------------|-------------|--------------|
| C | -0.022405000 | 1.201257000 | -0.033955000 |
| C | 1.023336000  | 2.126027000 | -0.082730000 |
| C | -1.378888000 | 1.567474000 | -0.013357000 |
| C | 0.689037000  | 3.491777000 | -0.111480000 |



|   |              |              |              |
|---|--------------|--------------|--------------|
| C | -1.658684000 | 2.937245000  | -0.044371000 |
| C | -0.626101000 | 3.895142000  | -0.091773000 |
| C | 1.537111000  | -0.551158000 | -0.016347000 |
| C | 2.649788000  | 0.229946000  | -0.067411000 |
| O | 0.259038000  | -0.130664000 | 0.000638000  |
| C | 2.430492000  | 1.692715000  | -0.101310000 |
| C | 4.002248000  | -0.402185000 | -0.084021000 |
| C | 5.187954000  | 0.355530000  | -0.139934000 |
| C | 4.155298000  | -1.802796000 | -0.046221000 |
| C | 6.443404000  | -0.245115000 | -0.156373000 |
| C | 5.403190000  | -2.411440000 | -0.062569000 |
| C | 6.561213000  | -1.631490000 | -0.117799000 |
| O | 3.336457000  | 2.532056000  | -0.141728000 |
| C | -2.492812000 | 0.550036000  | 0.034599000  |
| O | -2.962956000 | 3.317175000  | -0.026760000 |
| C | -2.491990000 | -0.295904000 | 1.325407000  |
| C | -3.613883000 | -1.322304000 | 1.250829000  |
| C | -3.484345000 | -2.154145000 | -0.019541000 |
| C | -3.416708000 | -1.267842000 | -1.276366000 |
| O | -2.374602000 | -0.298036000 | -1.122586000 |
| C | -4.757514000 | -0.626549000 | -1.679375000 |
| O | -5.640856000 | -1.583910000 | -2.263733000 |
| O | -4.591374000 | -3.051203000 | -0.161138000 |
| O | -3.574350000 | -2.238292000 | 2.346484000  |
| O | -2.755104000 | 0.515820000  | 2.471285000  |
| H | -3.440654000 | 1.091977000  | 0.005816000  |
| O | 7.818804000  | -2.169349000 | -0.136056000 |
| H | 5.124787000  | 1.430766000  | -0.170579000 |
| H | 3.297914000  | -2.460764000 | -0.003007000 |
| H | 7.340013000  | 0.362150000  | -0.199734000 |
| H | -1.539687000 | -0.820553000 | 1.432487000  |
| H | -4.576025000 | -0.793790000 | 1.251434000  |
| H | -2.551051000 | -2.726532000 | 0.047039000  |
| H | -3.098964000 | -1.888692000 | -2.116860000 |
| H | -5.243157000 | -0.127560000 | -0.833370000 |
| H | -4.551459000 | 0.127922000  | -2.440825000 |
| H | -5.730931000 | -2.301344000 | -1.619383000 |
| H | -4.724780000 | -3.497702000 | 0.684534000  |
| H | -3.689819000 | -1.732595000 | 3.159991000  |
| H | -1.949178000 | 0.981376000  | 2.721432000  |
| H | 7.770784000  | -3.132402000 | -0.105889000 |
| H | -0.879963000 | 4.949059000  | -0.115203000 |
| H | 1.552265000  | -1.629625000 | 0.015829000  |
| H | 5.475342000  | -3.493882000 | -0.033332000 |

|   |              |             |              |
|---|--------------|-------------|--------------|
| H | 1.491407000  | 4.217096000 | -0.148825000 |
| H | -3.035725000 | 4.279002000 | -0.058217000 |

$E = -1489.7712468$  a. u.

$H = -1489.355875$  a. u.

$G = -1489.438494$  a. u.

$f = 71.74i$

## 5 Prunetin-8-C-glucoside

a Global Minimum Point H-C<sub>7</sub> eclipsed

|   |              |              |              |
|---|--------------|--------------|--------------|
| C | 0.019313000  | 0.863914000  | -0.022898000 |
| C | 1.058002000  | 1.810233000  | -0.093929000 |
| C | -1.334534000 | 1.199825000  | -0.015313000 |
| C | 0.693792000  | 3.181701000  | -0.163368000 |
| C | -1.642753000 | 2.576583000  | -0.089340000 |
| C | -0.641944000 | 3.554615000  | -0.157948000 |
| C | 1.616916000  | -0.862786000 | 0.048108000  |
| C | 2.691561000  | -0.043241000 | -0.040320000 |
| O | 0.330714000  | -0.464355000 | 0.048583000  |
| C | 2.449207000  | 1.397057000  | -0.106570000 |
| C | 4.059815000  | -0.606610000 | -0.079507000 |
| C | 5.088849000  | -0.071758000 | 0.711677000  |
| C | 4.355803000  | -1.707290000 | -0.893554000 |
| C | 6.361370000  | -0.627581000 | 0.702806000  |
| C | 5.628159000  | -2.273505000 | -0.909312000 |
| C | 6.634786000  | -1.732917000 | -0.107544000 |
| O | 3.377710000  | 2.234176000  | -0.179419000 |
| C | -2.427712000 | 0.163449000  | 0.051102000  |
| O | -2.957324000 | 2.885648000  | -0.088102000 |
| C | -2.415793000 | -0.660019000 | 1.355865000  |
| C | -3.523602000 | -1.702406000 | 1.303164000  |
| C | -3.384795000 | -2.555219000 | 0.048041000  |
| C | -3.329258000 | -1.691328000 | -1.224959000 |
| O | -2.298438000 | -0.707302000 | -1.091397000 |
| C | -4.678025000 | -1.072399000 | -1.636577000 |
| O | -5.553937000 | -2.050073000 | -2.198633000 |
| O | -4.480687000 | -3.469094000 | -0.075683000 |
| O | -3.470822000 | -2.598593000 | 2.415379000  |
| O | -2.689028000 | 0.168687000  | 2.487766000  |
| H | -3.383928000 | 0.688510000  | 0.012201000  |
| O | 7.907159000  | -2.235061000 | -0.076201000 |
| O | 1.635865000  | 4.137115000  | -0.234109000 |

|   |              |              |              |
|---|--------------|--------------|--------------|
| H | 4.888449000  | 0.784128000  | 1.342554000  |
| H | 3.588228000  | -2.122488000 | -1.536964000 |
| H | 7.151598000  | -0.216655000 | 1.319795000  |
| H | -1.456746000 | -1.170182000 | 1.473274000  |
| H | -4.493009000 | -1.187496000 | 1.295856000  |
| H | -2.444404000 | -3.114719000 | 0.123804000  |
| H | -3.007040000 | -2.324833000 | -2.054415000 |
| H | -5.166033000 | -0.561102000 | -0.799323000 |
| H | -4.481960000 | -0.331386000 | -2.413769000 |
| H | -5.632120000 | -2.756590000 | -1.540758000 |
| H | -4.608548000 | -3.900102000 | 0.778836000  |
| H | -3.591877000 | -2.080204000 | 3.219950000  |
| H | -1.905265000 | 0.692417000  | 2.689744000  |
| H | 7.982626000  | -2.992608000 | -0.668876000 |
| H | 2.512411000  | 3.668169000  | -0.231488000 |
| H | -0.877358000 | 4.606968000  | -0.211552000 |
| C | -3.367918000 | 4.258577000  | -0.163126000 |
| H | -2.999944000 | 4.823331000  | 0.697036000  |
| H | -3.022967000 | 4.719654000  | -1.091958000 |
| H | -4.455027000 | 4.234694000  | -0.147697000 |
| H | 1.687365000  | -1.938994000 | 0.129706000  |
| H | 5.838410000  | -3.123052000 | -1.550410000 |

$E = -1604.3490242$  a. u.

$H = -1603.897736$  a. u.

$G = -1603.987184$  a. u.

**b H-C<sub>9</sub> eclipsed**

|   |              |              |              |
|---|--------------|--------------|--------------|
| C | -0.192630000 | 0.663376000  | -0.058273000 |
| C | -1.192482000 | 1.650448000  | -0.142418000 |
| C | 1.174316000  | 0.939959000  | -0.063414000 |
| C | -0.771343000 | 3.002748000  | -0.241538000 |
| C | 1.539798000  | 2.301584000  | -0.174706000 |
| C | 0.579522000  | 3.317703000  | -0.259474000 |
| C | -1.864197000 | -0.994339000 | 0.043090000  |
| C | -2.903145000 | -0.127930000 | -0.010645000 |
| O | -0.561262000 | -0.650823000 | 0.032434000  |
| C | -2.600018000 | 1.298312000  | -0.121340000 |
| C | -4.296141000 | -0.624544000 | 0.052431000  |
| C | -5.269952000 | -0.166733000 | -0.849155000 |
| C | -4.672108000 | -1.582589000 | 1.002156000  |
| C | -6.567109000 | -0.660748000 | -0.813921000 |
| C | -5.970148000 | -2.085915000 | 1.045917000  |
| C | -6.921076000 | -1.624655000 | 0.134188000  |

|   |              |              |              |
|---|--------------|--------------|--------------|
| O | -3.492912000 | 2.173703000  | -0.186289000 |
| C | 2.186329000  | -0.174764000 | 0.024829000  |
| O | 2.863545000  | 2.555587000  | -0.192551000 |
| C | 3.126946000  | -0.065796000 | 1.242803000  |
| C | 4.131516000  | -1.208714000 | 1.206518000  |
| C | 4.864719000  | -1.224869000 | -0.129245000 |
| C | 3.883572000  | -1.270888000 | -1.314771000 |
| O | 2.946013000  | -0.195543000 | -1.200199000 |
| C | 3.191777000  | -2.631778000 | -1.518972000 |
| O | 4.086663000  | -3.596805000 | -2.072866000 |
| O | 5.737008000  | -2.357189000 | -0.222268000 |
| O | 5.130104000  | -1.077329000 | 2.221057000  |
| O | 2.395591000  | -0.203071000 | 2.464240000  |
| H | 1.640558000  | -1.114509000 | 0.133912000  |
| O | -8.214189000 | -2.071601000 | 0.122191000  |
| O | -1.671711000 | 3.996691000  | -0.321247000 |
| H | -5.006071000 | 0.579069000  | -1.587354000 |
| H | -3.948080000 | -1.932066000 | 1.729531000  |
| H | -7.314719000 | -0.310797000 | -1.515779000 |
| H | 3.666645000  | 0.882479000  | 1.219278000  |
| H | 3.595645000  | -2.156725000 | 1.344381000  |
| H | 5.450023000  | -0.300350000 | -0.204219000 |
| H | 4.442152000  | -1.060882000 | -2.229674000 |
| H | 2.751405000  | -3.010564000 | -0.589697000 |
| H | 2.384015000  | -2.490950000 | -2.239599000 |
| H | 4.852712000  | -3.629885000 | -1.481150000 |
| H | 6.240749000  | -2.414614000 | 0.599470000  |
| H | 4.686489000  | -1.095500000 | 3.077535000  |
| H | 1.926744000  | 0.620297000  | 2.641626000  |
| H | -8.344846000 | -2.736076000 | 0.809335000  |
| H | -2.567642000 | 3.567036000  | -0.291996000 |
| H | 0.858859000  | 4.357395000  | -0.342435000 |
| C | 3.332294000  | 3.909514000  | -0.265721000 |
| H | 3.013540000  | 4.383190000  | -1.197476000 |
| H | 2.984292000  | 4.491603000  | 0.591319000  |
| H | 4.417332000  | 3.838649000  | -0.244350000 |
| H | -1.979774000 | -2.068275000 | 0.098389000  |
| H | -6.243451000 | -2.823775000 | 1.792907000  |

$E = -1604.348578$  a. u.

$H = -1603.897312$  a. u.

$G = -1603.987075$  a. u.

**c** Gauche-like

|   |              |              |              |
|---|--------------|--------------|--------------|
| C | -0.034977000 | 0.830161000  | 0.043765000  |
| C | -1.031307000 | 1.808040000  | -0.110326000 |
| C | 1.338041000  | 1.097374000  | 0.053381000  |
| C | -0.606558000 | 3.154312000  | -0.259648000 |
| C | 1.701601000  | 2.451966000  | -0.093007000 |
| C | 0.744409000  | 3.463811000  | -0.247200000 |
| C | -1.702806000 | -0.824722000 | 0.191152000  |
| C | -2.742236000 | 0.034857000  | 0.069301000  |
| O | -0.401301000 | -0.478216000 | 0.189068000  |
| C | -2.439443000 | 1.454231000  | -0.105972000 |
| C | -4.135356000 | -0.461499000 | 0.128936000  |
| C | -5.092794000 | -0.049418000 | -0.811344000 |
| C | -4.527721000 | -1.372969000 | 1.117186000  |
| C | -6.390255000 | -0.542700000 | -0.775088000 |
| C | -5.826022000 | -1.875144000 | 1.162306000  |
| C | -6.760746000 | -1.459595000 | 0.212565000  |
| O | -3.329959000 | 2.324362000  | -0.234812000 |
| C | 2.269102000  | -0.089514000 | 0.162700000  |
| O | 3.027425000  | 2.730780000  | -0.054774000 |
| C | 3.727743000  | 0.138988000  | 0.585257000  |
| C | 4.403498000  | -1.223990000 | 0.698462000  |
| C | 4.304789000  | -1.975035000 | -0.625861000 |
| C | 2.853929000  | -2.052565000 | -1.136891000 |
| O | 2.277172000  | -0.740885000 | -1.130690000 |
| C | 1.973328000  | -3.085176000 | -0.408469000 |
| O | 2.291544000  | -4.417637000 | -0.812534000 |
| O | 4.812257000  | -3.308606000 | -0.501977000 |
| O | 5.795526000  | -1.102393000 | 0.994999000  |
| O | 3.832794000  | 0.765078000  | 1.861782000  |
| H | 1.826376000  | -0.763817000 | 0.903109000  |
| O | -8.053484000 | -1.907424000 | 0.200033000  |
| O | -1.502321000 | 4.144345000  | -0.409387000 |
| H | -4.816015000 | 0.660165000  | -1.579856000 |
| H | -3.816648000 | -1.685592000 | 1.873546000  |
| H | -7.125430000 | -0.228112000 | -1.506206000 |
| H | 4.246168000  | 0.724728000  | -0.175656000 |
| H | 3.911080000  | -1.803334000 | 1.490931000  |
| H | 4.898432000  | -1.422081000 | -1.363953000 |
| H | 2.874643000  | -2.345134000 | -2.188902000 |
| H | 2.047640000  | -2.991263000 | 0.680541000  |
| H | 0.936416000  | -2.899236000 | -0.691987000 |
| H | 3.235808000  | -4.537412000 | -0.634759000 |
| H | 5.673656000  | -3.264028000 | -0.068706000 |

|   |              |              |              |
|---|--------------|--------------|--------------|
| H | 5.876237000  | -0.604150000 | 1.817662000  |
| H | 3.732161000  | 1.714506000  | 1.717494000  |
| H | -8.197599000 | -2.534013000 | 0.919368000  |
| H | -2.399364000 | 3.718001000  | -0.383224000 |
| H | 1.029765000  | 4.499412000  | -0.354802000 |
| C | 3.492028000  | 4.073436000  | -0.272993000 |
| H | 3.186105000  | 4.432654000  | -1.257960000 |
| H | 3.127000000  | 4.745218000  | 0.507294000  |
| H | 4.576643000  | 4.010440000  | -0.224950000 |
| H | -1.817623000 | -1.894739000 | 0.299104000  |
| H | -6.112160000 | -2.576544000 | 1.938990000  |

$E = -1604.3481024$  a. u.

$H = -1603.896739$  a. u.

$G = -1603.985706$  a. u.

Transition state - 8-C bond rotation ( $\varphi_1 = 16.8^\circ$ )

|   |              |              |              |
|---|--------------|--------------|--------------|
| C | 0.182352000  | 0.690087000  | 0.036085000  |
| C | 1.184758000  | 1.635532000  | -0.272106000 |
| C | -1.195921000 | 0.944951000  | 0.068800000  |
| C | 0.768798000  | 2.959350000  | -0.552282000 |
| C | -1.523444000 | 2.336756000  | -0.046108000 |
| C | -0.562751000 | 3.292577000  | -0.412068000 |
| C | 1.917425000  | -0.902195000 | 0.426831000  |
| C | 2.935538000  | -0.075757000 | 0.112449000  |
| O | 0.602469000  | -0.577946000 | 0.365530000  |
| C | 2.594218000  | 1.289160000  | -0.285211000 |
| C | 4.335750000  | -0.550839000 | 0.163459000  |
| C | 5.340770000  | 0.220857000  | 0.767635000  |
| C | 4.688176000  | -1.795948000 | -0.372209000 |
| C | 6.647486000  | -0.241459000 | 0.846460000  |
| C | 5.995379000  | -2.270213000 | -0.296737000 |
| C | 6.979110000  | -1.490509000 | 0.314032000  |
| O | 3.467950000  | 2.122204000  | -0.614956000 |
| C | -2.258228000 | -0.168403000 | 0.296237000  |
| O | -2.771966000 | 2.740970000  | 0.248791000  |
| C | -2.142300000 | -1.466508000 | -0.581057000 |
| C | -3.440960000 | -2.290465000 | -0.545713000 |
| C | -4.701917000 | -1.486078000 | -0.775450000 |
| C | -4.712181000 | -0.291406000 | 0.178556000  |
| O | -3.508356000 | 0.434244000  | -0.042825000 |
| C | -4.959470000 | -0.632887000 | 1.657608000  |
| O | -6.319203000 | -1.007975000 | 1.880204000  |

|   |              |              |              |
|---|--------------|--------------|--------------|
| O | -5.869433000 | -2.286430000 | -0.550588000 |
| O | -3.411649000 | -3.313456000 | -1.544446000 |
| O | -1.190844000 | -2.434884000 | -0.147046000 |
| H | -2.236116000 | -0.469965000 | 1.352376000  |
| O | 8.283081000  | -1.889856000 | 0.416858000  |
| O | 1.649273000  | 3.911328000  | -0.904410000 |
| H | 5.094678000  | 1.189496000  | 1.182187000  |
| H | 3.938381000  | -2.400456000 | -0.869957000 |
| H | 7.420250000  | 0.353922000  | 1.317903000  |
| H | -1.944650000 | -1.158950000 | -1.615702000 |
| H | -3.499287000 | -2.759303000 | 0.444176000  |
| H | -4.701945000 | -1.106684000 | -1.803892000 |
| H | -5.505130000 | 0.397784000  | -0.121426000 |
| H | -4.284061000 | -1.416981000 | 2.017459000  |
| H | -4.771696000 | 0.266244000  | 2.247690000  |
| H | -6.511933000 | -1.725659000 | 1.258518000  |
| H | -5.756522000 | -3.120069000 | -1.024462000 |
| H | -2.650843000 | -3.878252000 | -1.361425000 |
| H | -0.327240000 | -2.014174000 | -0.110919000 |
| H | 8.400351000  | -2.757976000 | 0.012489000  |
| H | 2.544220000  | 3.479713000  | -0.898750000 |
| H | -0.837009000 | 4.326053000  | -0.555155000 |
| C | -3.133603000 | 4.123159000  | 0.145740000  |
| H | -2.539887000 | 4.742518000  | 0.823641000  |
| H | -3.030840000 | 4.485329000  | -0.880608000 |
| H | -4.180252000 | 4.162186000  | 0.440061000  |
| H | 2.045025000  | -1.923202000 | 0.760053000  |
| H | 6.250033000  | -3.235735000 | -0.720851000 |

$E = -1604.3203782$  a. u.

$H = -1603.870837$  a. u.

$G = -1603.958771$  a. u.

$f = 54.74i$

Transition state - 8-C bond rotation ( $\varphi_1 = -165.5^\circ$ )

|   |              |              |              |
|---|--------------|--------------|--------------|
| C | 0.053057000  | 0.814708000  | -0.205089000 |
| C | 1.062383000  | 1.785850000  | -0.003450000 |
| C | -1.328964000 | 1.111082000  | -0.270146000 |
| C | 0.681015000  | 3.148191000  | 0.056367000  |
| C | -1.607960000 | 2.498922000  | -0.335466000 |
| C | -0.641909000 | 3.489917000  | -0.147644000 |
| C | 1.749246000  | -0.830632000 | -0.294985000 |
| C | 2.784154000  | 0.007874000  | -0.051302000 |

|   |              |              |              |
|---|--------------|--------------|--------------|
| O | 0.462029000  | -0.474474000 | -0.389681000 |
| C | 2.466702000  | 1.418501000  | 0.110294000  |
| C | 4.172157000  | -0.500562000 | 0.013418000  |
| C | 5.043976000  | -0.097072000 | 1.037141000  |
| C | 4.643728000  | -1.421297000 | -0.930816000 |
| C | 6.332918000  | -0.606554000 | 1.123541000  |
| C | 5.933790000  | -1.940405000 | -0.852750000 |
| C | 6.781941000  | -1.532614000 | 0.178248000  |
| O | 3.349885000  | 2.284740000  | 0.317213000  |
| C | -2.432404000 | 0.019723000  | -0.342934000 |
| O | -2.888323000 | 2.866101000  | -0.624944000 |
| C | -3.696846000 | 0.208406000  | 0.566519000  |
| C | -4.515060000 | -1.089891000 | 0.648795000  |
| C | -3.698941000 | -2.320352000 | 0.981225000  |
| C | -2.517451000 | -2.413844000 | 0.013899000  |
| O | -1.800992000 | -1.186012000 | 0.098437000  |
| C | -2.880286000 | -2.811272000 | -1.426654000 |
| O | -3.229518000 | -4.193455000 | -1.507379000 |
| O | -4.493030000 | -3.508815000 | 0.877407000  |
| O | -5.528627000 | -0.980286000 | 1.651759000  |
| O | -4.667815000 | 1.137886000  | 0.102912000  |
| H | -2.770717000 | -0.068971000 | -1.384466000 |
| O | 8.061934000  | -1.997476000 | 0.312801000  |
| O | 1.580966000  | 4.120994000  | 0.270608000  |
| H | 4.706470000  | 0.619271000  | 1.774503000  |
| H | 4.002759000  | -1.730397000 | -1.748830000 |
| H | 7.000615000  | -0.297260000 | 1.918884000  |
| H | -3.347069000 | 0.473224000  | 1.573243000  |
| H | -4.992738000 | -1.235470000 | -0.327846000 |
| H | -3.305208000 | -2.222845000 | 1.999668000  |
| H | -1.814256000 | -3.165666000 | 0.379798000  |
| H | -3.685735000 | -2.190111000 | -1.833971000 |
| H | -1.996342000 | -2.664293000 | -2.050274000 |
| H | -3.936362000 | -4.336729000 | -0.860439000 |
| H | -5.321662000 | -3.356488000 | 1.349002000  |
| H | -6.090661000 | -0.231620000 | 1.417041000  |
| H | -4.200411000 | 1.959992000  | -0.107922000 |
| H | 8.264480000  | -2.627923000 | -0.388851000 |
| H | 2.464310000  | 3.666240000  | 0.350621000  |
| H | -0.900508000 | 4.537177000  | -0.159488000 |
| C | -3.221160000 | 4.249359000  | -0.861470000 |
| H | -3.087827000 | 4.842432000  | 0.044975000  |
| H | -2.619509000 | 4.651035000  | -1.678256000 |
| H | -4.271014000 | 4.243007000  | -1.145615000 |



|   |             |              |              |
|---|-------------|--------------|--------------|
| H | 1.863466000 | -1.897064000 | -0.438448000 |
| H | 6.281338000 | -2.649367000 | -1.596823000 |

$E = -1604.326888$  a. u.

$H = -1603.877110$  a. u.

$G = -1603.963428$  a. u.

$f = 49.05i$

Transition state – B ring rotation ( $\varphi_2 = 179.8^\circ$ )

|   |              |              |              |
|---|--------------|--------------|--------------|
| C | 0.005351000  | 0.885069000  | -0.014540000 |
| C | 1.040528000  | 1.832341000  | -0.057219000 |
| C | -1.351394000 | 1.206525000  | 0.016727000  |
| C | 0.665031000  | 3.204967000  | -0.068388000 |
| C | -1.669687000 | 2.581888000  | -0.002498000 |
| C | -0.674010000 | 3.566437000  | -0.040799000 |
| C | 1.616958000  | -0.828460000 | -0.023564000 |
| C | 2.709397000  | -0.017785000 | -0.065542000 |
| O | 0.332289000  | -0.437990000 | -0.000878000 |
| C | 2.436486000  | 1.427580000  | -0.084637000 |
| C | 4.080138000  | -0.606533000 | -0.087823000 |
| C | 4.272167000  | -2.004635000 | -0.066058000 |
| C | 5.242105000  | 0.184348000  | -0.131503000 |
| C | 5.534397000  | -2.577085000 | -0.086126000 |
| C | 6.515405000  | -0.382139000 | -0.152226000 |
| C | 6.670543000  | -1.765464000 | -0.129527000 |
| O | 3.335453000  | 2.300874000  | -0.121347000 |
| C | -2.434586000 | 0.158849000  | 0.053575000  |
| O | -2.986021000 | 2.882533000  | 0.020399000  |
| C | -2.399450000 | -0.720669000 | 1.320662000  |
| C | -3.503679000 | -1.764839000 | 1.237502000  |
| C | -3.378133000 | -2.563434000 | -0.054416000 |
| C | -3.342233000 | -1.645195000 | -1.289529000 |
| O | -2.314258000 | -0.662752000 | -1.126023000 |
| C | -4.699444000 | -1.017190000 | -1.657407000 |
| O | -5.575019000 | -1.974581000 | -2.253904000 |
| O | -4.472140000 | -3.475670000 | -0.202824000 |
| O | -3.433512000 | -2.707034000 | 2.309951000  |
| O | -2.660020000 | 0.055023000  | 2.492356000  |
| H | -3.395019000 | 0.677794000  | 0.049220000  |
| O | 7.889973000  | -2.383407000 | -0.147698000 |
| O | 1.594113000  | 4.173650000  | -0.105310000 |
| H | 3.432413000  | -2.685547000 | -0.032576000 |
| H | 5.153595000  | 1.257836000  | -0.149716000 |

|   |              |              |              |
|---|--------------|--------------|--------------|
| H | 5.650921000  | -3.654124000 | -0.068758000 |
| H | -1.436682000 | -1.231171000 | 1.401411000  |
| H | -4.474907000 | -1.253866000 | 1.264106000  |
| H | -2.434753000 | -3.121629000 | -0.014524000 |
| H | -3.027459000 | -2.240332000 | -2.149699000 |
| H | -5.181518000 | -0.548616000 | -0.792219000 |
| H | -4.517314000 | -0.239927000 | -2.401892000 |
| H | -5.643113000 | -2.709604000 | -1.626914000 |
| H | -4.587223000 | -3.943180000 | 0.634130000  |
| H | -3.543061000 | -2.223124000 | 3.137354000  |
| H | -1.874624000 | 0.570060000  | 2.709542000  |
| H | 8.595575000  | -1.725851000 | -0.175000000 |
| H | 2.474526000  | 3.710229000  | -0.121226000 |
| H | -0.915090000 | 4.618867000  | -0.051662000 |
| C | -3.405120000 | 4.254747000  | -0.002611000 |
| H | -3.035664000 | 4.790353000  | 0.875378000  |
| H | -3.068009000 | 4.751169000  | -0.915940000 |
| H | -4.491972000 | 4.223730000  | 0.017924000  |
| H | 1.659823000  | -1.906300000 | -0.004560000 |
| H | 7.388070000  | 0.262124000  | -0.186462000 |

$E = -1604.3436251$  a. u.

$H = -1603.893428$  a. u.

$G = -1603.981241$  a. u.

$f = 71.89i$

Hybrid cluster-continuum model (IEFPCM + Explicit Solvation)

### 1 Isoschaftoside, $n = 8$ (H<sub>2</sub>O)

a H-C<sub>7</sub> eclipsed

|   |             |             |              |
|---|-------------|-------------|--------------|
| H | 8.139792000 | 1.596883000 | 0.741584000  |
| O | 7.913566000 | 2.465005000 | 0.381598000  |
| C | 6.563991000 | 2.543447000 | 0.220482000  |
| C | 6.045592000 | 3.738840000 | -0.295780000 |
| C | 5.701817000 | 1.489709000 | 0.544298000  |
| H | 6.729391000 | 4.539058000 | -0.556937000 |
| C | 4.677172000 | 3.876721000 | -0.474415000 |
| H | 6.077952000 | 0.555748000 | 0.955618000  |
| C | 4.333447000 | 1.636480000 | 0.351951000  |
| H | 4.291863000 | 4.799209000 | -0.895776000 |
| C | 3.792340000 | 2.831589000 | -0.148341000 |
| H | 3.677851000 | 0.815375000 | 0.613312000  |

|   |              |              |              |
|---|--------------|--------------|--------------|
| C | 2.341208000  | 2.999628000  | -0.296507000 |
| O | 1.685269000  | 1.812866000  | -0.443257000 |
| C | 1.673918000  | 4.185265000  | -0.264228000 |
| C | 0.320895000  | 1.764643000  | -0.579390000 |
| H | 2.207066000  | 5.112821000  | -0.104022000 |
| C | 0.237129000  | 4.238911000  | -0.377767000 |
| C | -0.425293000 | 2.952473000  | -0.539000000 |
| C | -0.263280000 | 0.501784000  | -0.766138000 |
| O | -0.407951000 | 5.313754000  | -0.319495000 |
| C | -1.844782000 | 2.877776000  | -0.603048000 |
| C | -1.664988000 | 0.484881000  | -0.873351000 |
| C | 0.522416000  | -0.786107000 | -0.857791000 |
| O | -2.575627000 | 3.991291000  | -0.512011000 |
| C | -2.470259000 | 1.635157000  | -0.732722000 |
| O | -2.277591000 | -0.714860000 | -1.102345000 |
| H | -0.164742000 | -1.589091000 | -1.130484000 |
| O | 1.524238000  | -0.640132000 | -1.870395000 |
| C | 1.189134000  | -1.186144000 | 0.481355000  |
| H | -1.916356000 | 4.747463000  | -0.423182000 |
| C | -3.956110000 | 1.502469000  | -0.519885000 |
| H | -3.189512000 | -0.515633000 | -1.418781000 |
| C | 2.232674000  | -1.846160000 | -2.177388000 |
| H | 1.806292000  | -0.359816000 | 0.850277000  |
| O | 0.183508000  | -1.498243000 | 1.471859000  |
| C | 2.081217000  | -2.425542000 | 0.314650000  |
| H | -4.433461000 | 2.485581000  | -0.592320000 |
| O | -4.507994000 | 0.619208000  | -1.531210000 |
| C | -4.230757000 | 0.884577000  | 0.873978000  |
| H | 2.983434000  | -1.533597000 | -2.913182000 |
| C | 1.371551000  | -2.908365000 | -2.881469000 |
| C | 2.991063000  | -2.314037000 | -0.919895000 |
| H | -0.317137000 | -0.698215000 | 1.760887000  |
| H | 1.434794000  | -3.300176000 | 0.184413000  |
| O | 2.935999000  | -2.621208000 | 1.446884000  |
| C | -5.919529000 | 0.407890000  | -1.406312000 |
| H | -3.700362000 | -0.074105000 | 0.919058000  |
| O | -3.823665000 | 1.722113000  | 1.938813000  |
| C | -5.713018000 | 0.597506000  | 1.065372000  |
| O | 0.422232000  | -3.566426000 | -2.056805000 |
| H | 0.829910000  | -2.390013000 | -3.682879000 |
| H | 2.050420000  | -3.630583000 | -3.352697000 |
| H | 0.808287000  | -4.430980000 | -1.797422000 |
| H | 3.740876000  | -1.540875000 | -0.696657000 |
| O | 3.652421000  | -3.540378000 | -1.199163000 |

|   |              |              |              |
|---|--------------|--------------|--------------|
| H | 2.398157000  | -2.891374000 | 2.228040000  |
| H | -6.448580000 | 1.368001000  | -1.479098000 |
| H | -6.231299000 | -0.233238000 | -2.232316000 |
| C | -6.248443000 | -0.260902000 | -0.067015000 |
| H | -2.918370000 | 1.450246000  | 2.187541000  |
| H | -6.268324000 | 1.547509000  | 1.078608000  |
| O | -5.926193000 | -0.097088000 | 2.303490000  |
| H | 4.508355000  | -3.576292000 | -0.701948000 |
| H | -5.754537000 | -1.245091000 | -0.029941000 |
| O | -7.663268000 | -0.415204000 | 0.025838000  |
| H | -5.586305000 | 0.504148000  | 2.985459000  |
| H | -7.856791000 | -0.663764000 | 0.941751000  |
| O | 6.048984000  | -3.506786000 | 0.027124000  |
| H | 6.660312000  | -3.108662000 | -0.604902000 |
| H | 5.954110000  | -2.843441000 | 0.750605000  |
| O | -8.015829000 | -1.865461000 | -2.417348000 |
| H | -8.162834000 | -1.460624000 | -1.545362000 |
| H | -7.775678000 | -2.778814000 | -2.219035000 |
| O | 1.219735000  | -3.015994000 | 3.508964000  |
| H | 0.735503000  | -3.851340000 | 3.532433000  |
| H | 0.675008000  | -2.420500000 | 2.951168000  |
| O | -1.564783000 | 0.223870000  | 2.730949000  |
| H | -1.226199000 | 0.476235000  | 3.600121000  |
| H | -2.264180000 | -0.481771000 | 2.901767000  |
| O | -2.200823000 | -2.905773000 | 0.851886000  |
| H | -2.375237000 | -2.425666000 | 0.025875000  |
| H | -1.286138000 | -2.625107000 | 1.048771000  |
| O | 1.979206000  | -5.698276000 | -1.303855000 |
| H | 2.705846000  | -5.040505000 | -1.209869000 |
| H | 1.834163000  | -6.046166000 | -0.415801000 |
| O | -3.386896000 | -1.660187000 | 2.943389000  |
| H | -3.091542000 | -2.222006000 | 2.181496000  |
| H | -4.284992000 | -1.353858000 | 2.729205000  |
| O | 5.398753000  | -1.598228000 | 1.857935000  |
| H | 5.615507000  | -1.780536000 | 2.781091000  |
| H | 4.446729000  | -1.852269000 | 1.760912000  |

$E = -2673.3134522$  a. u.

$H = -2673.3134522 + 0.799845$  (thermal correction 6-31G(d,p)) a. u.

$G = -2673.3134522 + 0.652546$  (thermal correction 6-31G(d,p)) a. u.

Transition state - 8-C bond rotation ( $\varphi_1 = 37.0^\circ$ )

|   |              |              |             |
|---|--------------|--------------|-------------|
| H | -7.946545000 | -2.370381000 | 1.080948000 |
|---|--------------|--------------|-------------|

|   |              |              |              |
|---|--------------|--------------|--------------|
| O | -7.477299000 | -3.201923000 | 1.232188000  |
| C | -6.202388000 | -3.094879000 | 0.772720000  |
| C | -5.359237000 | -4.199644000 | 0.950340000  |
| C | -5.716728000 | -1.942848000 | 0.142647000  |
| H | -5.747872000 | -5.083144000 | 1.444631000  |
| C | -4.041955000 | -4.136398000 | 0.520200000  |
| H | -6.366479000 | -1.082076000 | 0.007769000  |
| C | -4.397226000 | -1.889251000 | -0.294466000 |
| H | -3.383951000 | -4.981619000 | 0.693717000  |
| C | -3.534917000 | -2.981503000 | -0.104871000 |
| H | -4.058681000 | -1.008392000 | -0.828213000 |
| C | -2.126622000 | -2.941663000 | -0.529430000 |
| O | -1.534170000 | -1.725786000 | -0.295220000 |
| C | -1.438186000 | -3.977120000 | -1.061934000 |
| C | -0.188552000 | -1.497524000 | -0.557850000 |
| H | -1.935116000 | -4.914276000 | -1.276267000 |
| C | -0.025703000 | -3.861174000 | -1.349913000 |
| C | 0.578083000  | -2.570505000 | -1.054436000 |
| C | 0.332864000  | -0.222335000 | -0.281929000 |
| O | 0.634160000  | -4.818686000 | -1.815664000 |
| C | 1.979791000  | -2.400965000 | -1.204813000 |
| C | 1.749873000  | -0.131312000 | -0.403823000 |
| C | -0.451017000 | 0.967476000  | 0.330900000  |
| O | 2.734685000  | -3.398610000 | -1.667807000 |
| C | 2.569973000  | -1.193343000 | -0.831236000 |
| O | 2.367632000  | 1.026025000  | -0.056419000 |
| H | -0.261434000 | 0.928178000  | 1.409169000  |
| O | 0.134876000  | 2.200881000  | -0.078895000 |
| C | -2.000948000 | 0.919960000  | 0.203928000  |
| H | 2.110717000  | -4.166542000 | -1.838092000 |
| C | 4.073031000  | -1.095345000 | -0.751669000 |
| H | 3.267876000  | 1.018437000  | -0.458089000 |
| C | -0.496591000 | 3.262849000  | -0.788054000 |
| H | -2.300301000 | 0.371569000  | -0.692219000 |
| O | -2.539176000 | 0.265932000  | 1.370296000  |
| C | -2.642543000 | 2.303030000  | 0.084137000  |
| H | 4.510616000  | -1.918547000 | -1.326528000 |
| O | 4.495327000  | 0.166918000  | -1.331794000 |
| C | 4.605833000  | -1.155554000 | 0.706049000  |
| H | 0.032671000  | 3.393458000  | -1.744742000 |
| C | -0.232456000 | 4.542440000  | 0.022147000  |
| C | -1.974740000 | 2.996349000  | -1.108048000 |
| H | -2.335377000 | -0.676911000 | 1.265819000  |
| H | -2.478517000 | 2.887658000  | 0.993549000  |

|   |              |              |              |
|---|--------------|--------------|--------------|
| O | -4.044003000 | 2.213136000  | -0.180568000 |
| C | 5.920118000  | 0.312659000  | -1.411341000 |
| H | 4.222496000  | -0.279672000 | 1.248166000  |
| O | 4.253804000  | -2.338815000 | 1.383169000  |
| C | 6.130239000  | -1.065696000 | 0.659781000  |
| O | -0.815936000 | 4.548373000  | 1.321748000  |
| H | 0.852118000  | 4.615107000  | 0.151352000  |
| H | -0.568842000 | 5.408795000  | -0.556996000 |
| H | -1.692507000 | 4.996555000  | 1.270470000  |
| H | -2.032151000 | 2.299758000  | -1.957438000 |
| O | -2.600399000 | 4.210062000  | -1.486964000 |
| H | -4.514448000 | 1.877447000  | 0.619130000  |
| H | 6.336360000  | -0.473482000 | -2.056188000 |
| H | 6.123976000  | 1.286401000  | -1.859659000 |
| C | 6.556143000  | 0.223992000  | -0.022337000 |
| H | 3.472648000  | -2.121361000 | 1.947668000  |
| H | 6.509804000  | -1.917575000 | 0.069451000  |
| O | 6.693017000  | -1.084241000 | 1.962268000  |
| H | -3.202767000 | 4.013966000  | -2.249257000 |
| H | 6.207993000  | 1.070334000  | 0.589969000  |
| O | 7.975652000  | 0.279999000  | -0.174143000 |
| H | 6.242989000  | -1.815884000 | 2.413859000  |
| H | 8.347903000  | 0.009714000  | 0.678868000  |
| O | -4.055063000 | 3.410248000  | -3.595747000 |
| H | -3.490795000 | 3.329233000  | -4.374579000 |
| H | -4.306073000 | 2.487815000  | -3.352879000 |
| O | 8.030069000  | 2.823054000  | -1.449087000 |
| H | 8.272899000  | 1.991864000  | -1.003569000 |
| H | 7.897799000  | 3.446290000  | -0.724324000 |
| O | -5.147256000 | 0.945313000  | 1.938530000  |
| H | -5.180555000 | 1.388688000  | 2.795976000  |
| H | -4.280108000 | 0.488701000  | 1.915306000  |
| O | 2.293491000  | -1.440337000 | 3.055475000  |
| H | 2.703999000  | -1.488563000 | 3.927818000  |
| H | 2.094796000  | -0.474634000 | 2.941418000  |
| O | -0.420823000 | 2.599313000  | 3.283798000  |
| H | -0.503263000 | 3.299125000  | 2.597046000  |
| H | -1.144386000 | 1.985857000  | 3.103271000  |
| O | -3.277341000 | 5.573288000  | 0.755406000  |
| H | -3.212137000 | 5.169301000  | -0.140692000 |
| H | -4.039183000 | 5.142185000  | 1.161413000  |
| O | 1.952332000  | 1.226376000  | 2.782689000  |
| H | 1.151100000  | 1.729204000  | 3.051386000  |
| H | 2.101456000  | 1.459441000  | 1.851945000  |

|   |              |             |              |
|---|--------------|-------------|--------------|
| O | -4.587357000 | 0.964672000 | -2.505553000 |
| H | -5.514995000 | 0.707081000 | -2.580628000 |
| H | -4.490347000 | 1.379181000 | -1.611610000 |

$E = -2673.2777982$  a. u.

$H = -2673.2777982 + 0.798361$  (thermal correction 6-31G(d,p)) a. u.

$G = -2673.2777982 + 0.65017$  (thermal correction 6-31G(d,p)) a. u.

$f = 122.69i$

Transition state - 8-C bond rotation ( $\varphi_1 = \text{about } -166^\circ$ ): not found

## 2 Schaftoside, $n = 6$ (DMSO)

a H-C<sub>7</sub> eclipsed

|   |              |              |              |
|---|--------------|--------------|--------------|
| H | -9.348942000 | -2.911958000 | -1.476289000 |
| O | -9.004167000 | -3.624203000 | -0.921293000 |
| C | -7.643360000 | -3.550520000 | -0.895603000 |
| C | -6.961631000 | -4.490280000 | -0.111691000 |
| C | -6.924073000 | -2.585754000 | -1.609404000 |
| H | -7.534229000 | -5.221715000 | 0.448005000  |
| C | -5.577256000 | -4.460130000 | -0.050511000 |
| H | -7.452023000 | -1.853450000 | -2.216541000 |
| C | -5.536168000 | -2.559840000 | -1.542104000 |
| H | -5.066842000 | -5.176697000 | 0.583662000  |
| C | -4.839127000 | -3.502536000 | -0.768408000 |
| H | -4.978284000 | -1.810442000 | -2.092046000 |
| C | -3.374181000 | -3.482917000 | -0.731964000 |
| O | -2.867133000 | -2.328875000 | -1.234592000 |
| C | -2.557907000 | -4.493531000 | -0.309313000 |
| C | -1.524639000 | -2.136627000 | -1.383268000 |
| H | -2.972739000 | -5.418765000 | 0.066738000  |
| C | -1.127816000 | -4.369851000 | -0.376853000 |
| C | -0.634043000 | -3.143700000 | -0.981632000 |
| C | -1.101887000 | -0.917633000 | -1.926230000 |
| O | -0.334347000 | -5.258632000 | 0.038088000  |
| C | 0.754451000  | -2.914473000 | -1.127120000 |
| C | 0.286297000  | -0.761593000 | -2.109713000 |
| C | -2.021569000 | 0.262820000  | -2.138234000 |
| O | 1.630635000  | -3.828458000 | -0.653268000 |
| C | 1.225532000  | -1.748642000 | -1.725343000 |
| O | 0.725128000  | 0.397208000  | -2.667640000 |
| H | -1.456679000 | 1.029946000  | -2.683235000 |
| O | -3.180617000 | -0.091531000 | -2.904552000 |

|   |              |              |              |
|---|--------------|--------------|--------------|
| C | -2.464563000 | 0.868795000  | -0.788960000 |
| H | 1.050126000  | -4.584713000 | -0.295135000 |
| C | 2.721428000  | -1.526886000 | -1.802495000 |
| H | 1.655647000  | 0.242850000  | -2.946513000 |
| C | -3.966462000 | 1.050385000  | -3.223565000 |
| H | -3.040552000 | 0.117943000  | -0.230593000 |
| O | -1.297739000 | 1.244061000  | -0.060582000 |
| C | -3.355794000 | 2.079801000  | -1.029480000 |
| H | 3.209711000  | -2.508129000 | -1.856077000 |
| O | 3.021139000  | -0.787615000 | -3.001798000 |
| C | 3.256150000  | -0.776594000 | -0.563281000 |
| H | -3.377079000 | 1.781191000  | -3.801446000 |
| H | -4.788193000 | 0.704281000  | -3.855088000 |
| C | -4.516291000 | 1.749425000  | -1.972423000 |
| H | -1.473491000 | 2.053390000  | 0.456789000  |
| H | -2.746464000 | 2.849123000  | -1.539486000 |
| O | -3.761008000 | 2.534381000  | 0.254349000  |
| C | 4.425038000  | -0.578589000 | -3.260626000 |
| H | 2.699149000  | 0.163251000  | -0.462814000 |
| O | 3.033225000  | -1.541085000 | 0.621828000  |
| C | 4.746136000  | -0.427428000 | -0.709839000 |
| H | -5.208448000 | 1.071737000  | -1.449287000 |
| O | -5.184323000 | 2.920053000  | -2.432495000 |
| H | -4.451387000 | 3.228345000  | 0.168595000  |
| H | 4.444006000  | 0.060423000  | -4.149006000 |
| C | 5.161733000  | -1.868665000 | -3.665516000 |
| C | 5.076695000  | 0.182464000  | -2.085579000 |
| H | 2.827996000  | -2.456017000 | 0.368160000  |
| H | 5.331218000  | -1.343510000 | -0.569239000 |
| O | 5.162554000  | 0.455794000  | 0.330150000  |
| H | -5.532011000 | 3.411285000  | -1.668234000 |
| O | 6.312861000  | -1.552877000 | -4.425514000 |
| H | 4.496424000  | -2.461529000 | -4.301966000 |
| H | 5.416985000  | -2.482017000 | -2.786664000 |
| H | 6.801731000  | -0.910985000 | -3.881928000 |
| H | 4.658507000  | 1.197814000  | -2.080696000 |
| O | 6.479521000  | 0.292503000  | -2.305604000 |
| H | 4.640786000  | 1.276829000  | 0.241608000  |
| H | 6.968412000  | -0.289085000 | -1.672453000 |
| C | 0.893547000  | 3.262506000  | 4.004696000  |
| S | -0.155943000 | 2.382379000  | 2.798754000  |
| C | 1.158262000  | 1.366819000  | 2.056831000  |
| O | -0.604679000 | 3.408819000  | 1.738194000  |
| H | 0.266271000  | 3.991189000  | 4.521224000  |



|   |              |              |              |
|---|--------------|--------------|--------------|
| H | 1.269323000  | 2.514488000  | 4.707605000  |
| H | 1.711511000  | 3.767889000  | 3.485811000  |
| H | 0.695745000  | 0.808933000  | 1.241958000  |
| H | 1.508578000  | 0.690676000  | 2.837332000  |
| H | 1.958671000  | 1.999284000  | 1.666008000  |
| C | 8.454630000  | 1.148209000  | 0.425887000  |
| S | 8.678788000  | -0.662324000 | 0.540026000  |
| C | 7.577851000  | -0.934746000 | 1.974082000  |
| O | 7.983934000  | -1.270119000 | -0.684365000 |
| H | 8.837570000  | 1.614285000  | 1.337435000  |
| H | 7.390460000  | 1.347299000  | 0.282437000  |
| H | 9.029179000  | 1.488113000  | -0.437400000 |
| H | 6.591972000  | -0.515043000 | 1.757043000  |
| H | 7.518265000  | -2.015036000 | 2.119775000  |
| H | 8.030249000  | -0.470400000 | 2.854970000  |
| C | 3.336758000  | 3.848575000  | -2.610927000 |
| S | 2.855445000  | 3.927615000  | -0.847291000 |
| C | 1.067413000  | 3.674465000  | -1.082781000 |
| O | 3.396379000  | 2.663464000  | -0.173110000 |
| H | 2.952515000  | 2.929680000  | -3.059165000 |
| H | 4.427276000  | 3.859684000  | -2.652582000 |
| H | 2.936405000  | 4.725496000  | -3.126347000 |
| H | 0.590466000  | 3.719336000  | -0.098392000 |
| H | 0.690304000  | 4.476977000  | -1.724073000 |
| H | 0.890648000  | 2.692732000  | -1.530713000 |
| C | -3.752613000 | 0.565570000  | 3.249449000  |
| S | -3.445778000 | -1.216650000 | 2.955616000  |
| C | -1.651511000 | -1.091639000 | 2.622180000  |
| O | -4.118342000 | -1.580305000 | 1.641419000  |
| H | -3.096762000 | 0.921544000  | 4.048178000  |
| H | -3.591617000 | 1.124006000  | 2.323203000  |
| H | -4.797131000 | 0.659408000  | 3.554379000  |
| H | -1.481294000 | -0.401288000 | 1.791723000  |
| H | -1.111380000 | -0.772900000 | 3.518893000  |
| H | -1.331021000 | -2.094929000 | 2.331124000  |
| C | -3.551279000 | 5.699600000  | 1.509584000  |
| S | -4.635531000 | 5.912524000  | 0.054189000  |
| C | -3.333331000 | 5.838224000  | -1.227493000 |
| O | -5.466214000 | 4.622049000  | -0.067023000 |
| H | -2.984953000 | 4.766795000  | 1.429017000  |
| H | -4.202257000 | 5.676855000  | 2.385462000  |
| H | -2.881572000 | 6.561555000  | 1.571054000  |
| H | -2.645087000 | 5.019354000  | -1.013078000 |
| H | -2.809627000 | 6.797234000  | -1.248934000 |

|   |              |              |              |
|---|--------------|--------------|--------------|
| H | -3.840076000 | 5.657259000  | -2.176896000 |
| C | 1.248677000  | -2.426180000 | 6.360833000  |
| S | 2.077894000  | -1.251008000 | 5.228679000  |
| C | 2.187664000  | -2.372030000 | 3.789183000  |
| O | 1.050857000  | -0.170289000 | 4.898952000  |
| H | 1.049083000  | -1.890008000 | 7.290175000  |
| H | 1.908946000  | -3.275242000 | 6.555192000  |
| H | 0.308227000  | -2.757439000 | 5.913982000  |
| H | 1.191031000  | -2.740962000 | 3.534758000  |
| H | 2.852981000  | -3.202515000 | 4.041495000  |
| H | 2.597893000  | -1.810282000 | 2.945576000  |

$E = -5381.2810927$  a. u.

$H = -5381.2810927 + 1.105306$  (thermal correction 6-31G(d,p)) a. u.

$G = -5381.2810927 + 0.896955$  (thermal correction 6-31G(d,p)) a. u.

Transition state - 8-C bond rotation ( $\varphi_1 = 21.7^\circ$ )

|   |              |             |              |
|---|--------------|-------------|--------------|
| H | -7.073906000 | 6.290795000 | -3.072285000 |
| O | -6.706175000 | 6.920498000 | -2.437646000 |
| C | -5.564584000 | 6.407204000 | -1.904567000 |
| C | -4.915989000 | 7.165251000 | -0.919973000 |
| C | -5.034369000 | 5.172312000 | -2.292180000 |
| H | -5.348202000 | 8.112439000 | -0.616560000 |
| C | -3.753521000 | 6.686190000 | -0.337262000 |
| H | -5.538790000 | 4.574565000 | -3.047412000 |
| C | -3.864860000 | 4.699934000 | -1.707675000 |
| H | -3.279559000 | 7.268570000 | 0.445657000  |
| C | -3.200964000 | 5.448151000 | -0.720612000 |
| H | -3.478747000 | 3.732756000 | -2.004706000 |
| C | -1.945669000 | 4.977615000 | -0.116492000 |
| O | -1.808779000 | 3.615189000 | -0.155405000 |
| C | -0.987455000 | 5.769418000 | 0.424917000  |
| C | -0.655316000 | 2.967013000 | 0.261956000  |
| H | -1.089039000 | 6.846199000 | 0.420427000  |
| C | 0.218991000  | 5.199444000 | 0.969443000  |
| C | 0.363383000  | 3.762453000 | 0.825715000  |
| C | -0.562683000 | 1.574992000 | 0.080444000  |
| O | 1.107187000  | 5.911275000 | 1.503837000  |
| C | 1.582747000  | 3.143053000 | 1.187849000  |
| C | 0.758548000  | 1.049494000 | 0.290704000  |
| C | -1.735869000 | 0.652182000 | -0.364858000 |
| O | 2.572374000  | 3.878148000 | 1.735472000  |
| C | 1.791130000  | 1.800198000 | 0.910520000  |

|   |              |              |              |
|---|--------------|--------------|--------------|
| O | 1.062544000  | -0.181462000 | -0.147011000 |
| H | -1.861277000 | 0.712865000  | -1.461308000 |
| O | -1.352540000 | -0.668544000 | 0.008115000  |
| C | -3.151820000 | 0.898589000  | 0.276725000  |
| H | 2.209818000  | 4.821856000  | 1.786527000  |
| C | 3.175901000  | 1.233435000  | 1.162552000  |
| H | 1.888873000  | -0.484732000 | 0.303602000  |
| C | -2.181834000 | -1.705162000 | -0.483361000 |
| H | -3.013648000 | 1.014012000  | 1.362415000  |
| O | -3.881378000 | 1.980633000  | -0.273139000 |
| C | -4.114128000 | -0.288658000 | 0.035992000  |
| H | 3.602270000  | 1.769009000  | 2.021615000  |
| O | 3.042336000  | -0.155803000 | 1.493431000  |
| C | 4.128493000  | 1.428224000  | -0.042144000 |
| H | -2.362365000 | -1.596612000 | -1.566060000 |
| H | -1.658473000 | -2.650014000 | -0.321833000 |
| C | -3.496940000 | -1.656095000 | 0.276675000  |
| H | -3.469673000 | 2.796981000  | 0.027032000  |
| H | -4.390522000 | -0.242092000 | -1.028744000 |
| O | -5.276864000 | -0.156744000 | 0.836681000  |
| C | 4.257240000  | -0.865993000 | 1.817846000  |
| H | 3.693729000  | 0.931305000  | -0.919836000 |
| O | 4.272935000  | 2.799522000  | -0.375128000 |
| C | 5.483714000  | 0.772953000  | 0.266753000  |
| H | -3.268861000 | -1.772980000 | 1.345342000  |
| O | -4.362795000 | -2.701909000 | -0.156396000 |
| H | -5.936857000 | 0.377708000  | 0.339957000  |
| H | 3.948896000  | -1.913561000 | 1.832712000  |
| C | 4.775929000  | -0.528020000 | 3.225702000  |
| C | 5.293960000  | -0.690157000 | 0.690271000  |
| H | 4.105266000  | 3.329855000  | 0.419262000  |
| H | 5.954343000  | 1.331009000  | 1.086353000  |
| O | 6.384382000  | 0.871658000  | -0.827528000 |
| H | -5.009625000 | -2.861675000 | 0.563615000  |
| O | 5.591782000  | -1.578988000 | 3.715009000  |
| H | 3.915401000  | -0.438286000 | 3.897450000  |
| H | 5.313113000  | 0.434284000  | 3.243122000  |
| H | 6.236489000  | -1.744131000 | 3.005954000  |
| H | 4.902421000  | -1.232380000 | -0.175365000 |
| O | 6.535567000  | -1.300630000 | 1.061096000  |
| H | 6.024496000  | 0.341880000  | -1.575802000 |
| H | 7.181387000  | -0.595030000 | 1.301400000  |
| C | 1.874741000  | -5.336848000 | -1.048248000 |
| S | 1.634770000  | -3.606094000 | -0.510350000 |

|   |              |              |              |
|---|--------------|--------------|--------------|
| C | 0.932689000  | -2.983072000 | -2.075215000 |
| O | 3.025601000  | -2.985004000 | -0.363891000 |
| H | 2.369047000  | -5.861574000 | -0.228277000 |
| H | 0.887907000  | -5.762341000 | -1.246029000 |
| H | 2.509712000  | -5.357206000 | -1.938067000 |
| H | 0.738266000  | -1.921339000 | -1.916612000 |
| H | 0.007414000  | -3.528737000 | -2.272617000 |
| H | 1.665593000  | -3.121598000 | -2.874700000 |
| C | 9.611598000  | 0.330992000  | -0.404405000 |
| S | 9.422264000  | 1.286562000  | 1.142753000  |
| C | 8.670943000  | 2.773801000  | 0.386799000  |
| O | 8.340179000  | 0.576426000  | 1.960387000  |
| H | 10.285798000 | 0.862592000  | -1.081005000 |
| H | 8.612839000  | 0.214987000  | -0.833046000 |
| H | 10.040316000 | -0.635387000 | -0.132453000 |
| H | 7.806716000  | 2.485020000  | -0.217751000 |
| H | 8.372462000  | 3.425779000  | 1.210008000  |
| H | 9.433962000  | 3.274694000  | -0.216115000 |
| C | 7.621586000  | -2.026161000 | -3.614234000 |
| S | 5.835924000  | -2.151759000 | -3.229366000 |
| C | 5.992947000  | -3.185093000 | -1.733804000 |
| O | 5.379676000  | -0.751413000 | -2.822171000 |
| H | 8.151444000  | -1.609973000 | -2.754259000 |
| H | 7.719246000  | -1.358166000 | -4.471799000 |
| H | 8.010686000  | -3.016074000 | -3.866463000 |
| H | 4.980478000  | -3.327720000 | -1.340789000 |
| H | 6.427661000  | -4.143764000 | -2.033070000 |
| H | 6.610155000  | -2.685305000 | -0.981059000 |
| C | -5.178853000 | -1.551284000 | 3.737598000  |
| S | -6.408862000 | -2.821340000 | 3.292464000  |
| C | -5.929793000 | -4.066814000 | 4.542185000  |
| O | -6.013210000 | -3.423143000 | 1.941093000  |
| H | -5.447793000 | -1.134442000 | 4.712095000  |
| H | -4.180125000 | -1.994765000 | 3.767836000  |
| H | -5.227300000 | -0.788458000 | 2.955206000  |
| H | -4.882020000 | -4.338139000 | 4.393718000  |
| H | -6.089806000 | -3.658645000 | 5.543357000  |
| H | -6.566534000 | -4.939848000 | 4.390050000  |
| C | -7.070544000 | -1.503193000 | -2.226124000 |
| S | -8.164902000 | -0.400860000 | -1.258204000 |
| C | -8.460349000 | -1.554873000 | 0.129047000  |
| O | -7.320018000 | 0.756256000  | -0.729387000 |
| H | -6.226034000 | -1.838671000 | -1.617356000 |
| H | -6.716334000 | -0.922085000 | -3.079831000 |

|   |              |              |              |
|---|--------------|--------------|--------------|
| H | -7.659672000 | -2.353306000 | -2.581899000 |
| H | -7.510569000 | -1.879909000 | 0.559414000  |
| H | -9.034094000 | -2.409636000 | -0.239428000 |
| H | -9.049227000 | -1.010398000 | 0.869776000  |
| C | -3.370294000 | -5.957986000 | 0.343435000  |
| S | -2.566636000 | -6.107518000 | -1.293428000 |
| C | -3.889663000 | -5.286800000 | -2.254675000 |
| O | -1.361791000 | -5.171291000 | -1.293303000 |
| H | -2.643198000 | -6.301064000 | 1.081922000  |
| H | -4.252180000 | -6.604290000 | 0.365451000  |
| H | -3.645966000 | -4.915998000 | 0.519970000  |
| H | -4.095210000 | -4.305421000 | -1.819641000 |
| H | -4.780989000 | -5.920573000 | -2.238904000 |
| H | -3.522895000 | -5.194216000 | -3.278764000 |

$E = -5381.2480749$  a. u.

$H = -5381.2480749 + 1.104003$  (thermal correction 6-31G(d,p)) a. u.

$G = -5381.2480749 + 0.896436$  (thermal correction 6-31G(d,p)) a. u.

$f = 38.91i$

Transition state - 8-C bond rotation ( $\varphi_1 = -164.0^\circ$ )

|   |              |              |              |
|---|--------------|--------------|--------------|
| H | -9.023721000 | -3.591046000 | -0.016197000 |
| O | -8.637064000 | -4.349943000 | 0.442392000  |
| C | -7.280651000 | -4.240893000 | 0.395240000  |
| C | -6.527362000 | -5.255744000 | 1.003158000  |
| C | -6.638407000 | -3.167917000 | -0.232318000 |
| H | -7.043932000 | -6.087020000 | 1.470719000  |
| C | -5.142551000 | -5.185013000 | 0.993353000  |
| H | -7.209453000 | -2.362715000 | -0.689850000 |
| C | -5.251270000 | -3.112398000 | -0.242445000 |
| H | -4.576638000 | -5.986081000 | 1.457002000  |
| C | -4.476469000 | -4.106763000 | 0.378723000  |
| H | -4.748855000 | -2.288401000 | -0.730268000 |
| C | -3.014074000 | -3.997699000 | 0.391108000  |
| O | -2.564666000 | -3.019054000 | -0.434691000 |
| C | -2.154894000 | -4.747894000 | 1.139129000  |
| C | -1.235503000 | -2.727793000 | -0.595175000 |
| H | -2.518293000 | -5.496025000 | 1.830025000  |
| C | -0.739043000 | -4.562136000 | 1.021604000  |
| C | -0.302681000 | -3.552730000 | 0.073941000  |
| C | -0.848205000 | -1.659018000 | -1.433538000 |
| O | 0.091320000  | -5.224393000 | 1.709616000  |
| C | 1.080255000  | -3.354873000 | -0.150051000 |

|   |              |              |              |
|---|--------------|--------------|--------------|
| C | 0.536438000  | -1.640093000 | -1.753882000 |
| C | -1.808817000 | -0.570734000 | -1.988136000 |
| O | 1.982736000  | -4.068629000 | 0.556848000  |
| C | 1.509858000  | -2.434148000 | -1.094581000 |
| O | 0.918689000  | -0.819569000 | -2.737782000 |
| H | -2.051991000 | -0.765819000 | -3.045845000 |
| O | -2.987026000 | -0.676658000 | -1.177547000 |
| C | -1.291800000 | 0.913198000  | -1.888721000 |
| H | 1.423919000  | -4.684931000 | 1.148815000  |
| C | 3.003846000  | -2.220796000 | -1.259688000 |
| H | 1.872610000  | -0.977929000 | -2.920534000 |
| C | -4.047292000 | 0.239219000  | -1.414398000 |
| H | -0.793852000 | 1.019299000  | -0.911365000 |
| O | -0.418210000 | 1.294127000  | -2.946018000 |
| C | -2.442175000 | 1.946544000  | -1.951486000 |
| H | 3.509557000  | -3.174481000 | -1.058824000 |
| O | 3.284522000  | -1.816650000 | -2.611156000 |
| C | 3.532412000  | -1.166666000 | -0.259194000 |
| H | -4.355540000 | 0.237711000  | -2.471596000 |
| H | -4.902026000 | -0.091678000 | -0.821521000 |
| C | -3.578081000 | 1.626794000  | -0.998663000 |
| H | -0.487727000 | 2.262380000  | -2.957174000 |
| H | -2.848498000 | 1.919620000  | -2.972081000 |
| O | -1.869341000 | 3.246306000  | -1.796337000 |
| C | 4.673344000  | -1.596481000 | -2.937992000 |
| H | 2.960351000  | -0.240521000 | -0.398703000 |
| O | 3.323174000  | -1.583748000 | 1.087011000  |
| C | 5.016373000  | -0.855430000 | -0.505220000 |
| H | -3.202740000 | 1.557392000  | 0.033295000  |
| O | -4.639570000 | 2.569954000  | -1.069667000 |
| H | -2.011496000 | 3.543061000  | -0.875724000 |
| H | 4.647205000  | -1.183595000 | -3.950759000 |
| C | 5.474897000  | -2.906819000 | -3.045328000 |
| C | 5.295273000  | -0.547609000 | -1.988114000 |
| H | 3.218169000  | -2.549461000 | 1.100774000  |
| H | 5.607826000  | -1.731277000 | -0.210550000 |
| O | 5.462335000  | 0.208599000  | 0.325050000  |
| H | -4.304521000 | 3.377437000  | -0.634114000 |
| O | 6.601707000  | -2.721819000 | -3.880754000 |
| H | 4.835570000  | -3.662922000 | -3.513190000 |
| H | 5.768379000  | -3.285920000 | -2.053398000 |
| H | 7.056652000  | -1.943438000 | -3.514837000 |
| H | 4.824040000  | 0.421351000  | -2.212728000 |
| O | 6.685761000  | -0.424404000 | -2.262640000 |

|   |              |              |              |
|---|--------------|--------------|--------------|
| H | 4.814860000  | 0.946445000  | 0.262182000  |
| H | 7.211825000  | -0.832080000 | -1.531027000 |
| C | 2.091712000  | 3.050123000  | 3.060860000  |
| S | 0.491631000  | 3.809966000  | 2.636639000  |
| C | -0.322068000 | 2.317171000  | 1.991117000  |
| O | 0.719638000  | 4.759415000  | 1.438687000  |
| H | 2.703905000  | 3.827808000  | 3.522611000  |
| H | 1.889882000  | 2.241312000  | 3.770182000  |
| H | 2.568768000  | 2.675828000  | 2.149692000  |
| H | -1.305649000 | 2.632481000  | 1.637464000  |
| H | -0.393140000 | 1.593710000  | 2.809281000  |
| H | 0.275055000  | 1.914457000  | 1.169063000  |
| C | 8.672637000  | 0.994590000  | 0.298205000  |
| S | 8.962125000  | -0.766263000 | 0.694943000  |
| C | 7.878778000  | -0.850645000 | 2.164448000  |
| O | 8.285928000  | -1.584007000 | -0.412055000 |
| H | 9.042904000  | 1.611453000  | 1.121274000  |
| H | 7.600938000  | 1.131024000  | 0.135063000  |
| H | 9.232994000  | 1.212316000  | -0.612719000 |
| H | 6.874463000  | -0.515870000 | 1.890415000  |
| H | 7.868580000  | -1.894193000 | 2.484920000  |
| H | 8.311327000  | -0.229408000 | 2.953945000  |
| C | 1.844063000  | 3.427484000  | -1.579927000 |
| S | 3.565661000  | 3.262307000  | -1.011934000 |
| C | 3.700515000  | 4.894810000  | -0.202693000 |
| O | 3.542620000  | 2.217996000  | 0.118360000  |
| H | 1.217417000  | 3.704490000  | -0.728126000 |
| H | 1.538156000  | 2.464989000  | -1.996813000 |
| H | 1.808234000  | 4.195561000  | -2.358194000 |
| H | 4.657530000  | 4.909461000  | 0.322124000  |
| H | 3.694440000  | 5.667993000  | -0.976106000 |
| H | 2.865152000  | 5.022348000  | 0.492212000  |
| C | -7.704300000 | 2.146888000  | -2.477901000 |
| S | -8.334395000 | 1.053793000  | -1.150435000 |
| C | -7.736233000 | 2.068134000  | 0.251460000  |
| O | -7.499295000 | -0.219050000 | -1.173460000 |
| H | -8.270778000 | 3.082481000  | -2.463303000 |
| H | -6.637622000 | 2.330003000  | -2.325751000 |
| H | -7.879250000 | 1.627502000  | -3.422036000 |
| H | -6.660660000 | 2.228223000  | 0.139219000  |
| H | -8.279375000 | 3.017419000  | 0.263920000  |
| H | -7.953263000 | 1.507967000  | 1.162950000  |
| C | -2.153391000 | 6.536847000  | 1.862007000  |
| S | -2.900536000 | 5.959069000  | 0.303033000  |

|   |              |              |              |
|---|--------------|--------------|--------------|
| C | -1.464827000 | 6.294431000  | -0.773383000 |
| O | -3.012149000 | 4.421963000  | 0.417621000  |
| H | -1.162811000 | 6.086879000  | 1.970025000  |
| H | -2.821569000 | 6.231172000  | 2.668782000  |
| H | -2.091105000 | 7.628098000  | 1.826860000  |
| H | -0.579237000 | 5.843149000  | -0.317824000 |
| H | -1.353934000 | 7.376788000  | -0.878914000 |
| H | -1.681960000 | 5.835065000  | -1.739200000 |
| C | -0.721270000 | -1.656098000 | 5.483122000  |
| S | 0.800557000  | -0.938445000 | 4.762328000  |
| C | 0.673650000  | -1.743994000 | 3.131908000  |
| O | 0.521060000  | 0.549080000  | 4.560641000  |
| H | -0.842529000 | -1.222709000 | 6.477392000  |
| H | -0.612428000 | -2.741003000 | 5.558391000  |
| H | -1.577113000 | -1.393971000 | 4.856257000  |
| H | -0.268795000 | -1.451755000 | 2.661615000  |
| H | 0.717484000  | -2.830066000 | 3.253145000  |
| H | 1.518143000  | -1.408429000 | 2.524215000  |

$E = -5381.2463867$  a. u.

$H = -5381.2463867 + 1.104574$  (thermal correction 6-31G(d,p)) a. u.

$G = -5381.2463867 + 0.901486$  (thermal correction 6-31G(d,p)) a. u.

$f = 44.52i$

### 3 Vitexin, $n = 4$ (DMSO)

a H-C<sub>7</sub> eclipsed

|   |              |              |              |
|---|--------------|--------------|--------------|
| H | -6.245242000 | -0.697886000 | -2.484938000 |
| O | -5.979938000 | -1.633637000 | -2.660000000 |
| C | -4.635862000 | -1.726410000 | -2.662369000 |
| C | -4.052830000 | -3.005956000 | -2.705308000 |
| C | -3.803507000 | -0.593524000 | -2.611170000 |
| H | -4.703302000 | -3.872624000 | -2.759128000 |
| C | -2.674195000 | -3.148999000 | -2.630175000 |
| H | -4.255974000 | 0.392028000  | -2.606230000 |
| C | -2.429540000 | -0.746611000 | -2.528665000 |
| H | -2.244669000 | -4.146208000 | -2.612934000 |
| C | -1.837685000 | -2.023864000 | -2.515939000 |
| H | -1.792015000 | 0.127990000  | -2.466055000 |
| C | -0.393375000 | -2.138808000 | -2.309339000 |
| O | 0.086971000  | -1.034474000 | -1.675611000 |
| C | 0.430495000  | -3.170065000 | -2.651116000 |
| C | 1.403621000  | -0.897741000 | -1.341344000 |



|   |              |              |              |
|---|--------------|--------------|--------------|
| H | 0.043412000  | -4.033445000 | -3.176860000 |
| C | 1.837466000  | -3.129866000 | -2.332958000 |
| C | 2.307378000  | -1.917038000 | -1.684355000 |
| C | 1.756320000  | 0.259059000  | -0.641257000 |
| O | 2.621745000  | -4.086437000 | -2.579515000 |
| C | 3.676914000  | -1.736761000 | -1.343497000 |
| C | 3.132722000  | 0.410361000  | -0.351204000 |
| C | 0.747082000  | 1.290505000  | -0.189838000 |
| O | 4.570280000  | -2.697791000 | -1.631024000 |
| C | 4.079420000  | -0.572457000 | -0.700817000 |
| O | 3.513167000  | 1.530044000  | 0.289557000  |
| H | 1.294808000  | 2.030345000  | 0.402236000  |
| O | 0.179132000  | 1.918875000  | -1.361621000 |
| C | -0.372385000 | 0.722027000  | 0.726535000  |
| H | 4.043669000  | -3.424032000 | -2.080484000 |
| H | 5.122968000  | -0.434678000 | -0.442531000 |
| H | 4.499459000  | 1.571401000  | 0.377256000  |
| C | -0.700398000 | 3.017905000  | -1.101941000 |
| H | -0.928570000 | -0.056873000 | 0.193800000  |
| O | 0.169264000  | 0.229260000  | 1.940252000  |
| C | -1.344456000 | 1.850266000  | 1.067498000  |
| H | -1.108673000 | 3.289329000  | -2.081331000 |
| C | -1.847927000 | 2.519329000  | -0.209414000 |
| C | 0.018455000  | 4.276019000  | -0.578595000 |
| H | 0.499284000  | -0.685180000 | 1.810290000  |
| H | -0.807253000 | 2.584938000  | 1.686787000  |
| O | -2.521564000 | 1.422892000  | 1.745520000  |
| H | -2.405736000 | 1.758678000  | -0.774329000 |
| O | -2.739961000 | 3.589586000  | 0.141782000  |
| O | -0.807903000 | 5.422201000  | -0.696430000 |
| H | 0.903145000  | 4.441208000  | -1.201954000 |
| H | 0.369901000  | 4.141088000  | 0.456265000  |
| H | -1.640531000 | 5.187445000  | -0.254652000 |
| H | -2.327097000 | 1.271378000  | 2.703171000  |
| H | -3.141953000 | 3.282549000  | 0.973186000  |
| C | 2.802049000  | -3.231669000 | 3.741512000  |
| S | 2.469032000  | -2.724331000 | 2.015615000  |
| H | 2.126530000  | -4.043371000 | 4.022952000  |
| H | 3.845902000  | -3.541089000 | 3.837227000  |
| H | 2.617451000  | -2.356983000 | 4.367677000  |
| C | 2.726173000  | -4.363813000 | 1.251833000  |
| H | 3.742515000  | -4.699474000 | 1.473070000  |
| H | 2.609146000  | -4.260150000 | 0.172543000  |
| H | 1.985728000  | -5.061809000 | 1.649948000  |

|   |              |              |              |
|---|--------------|--------------|--------------|
| O | 0.964916000  | -2.438548000 | 1.946744000  |
| C | 8.099031000  | 1.986539000  | -1.562530000 |
| S | 6.545153000  | 2.696026000  | -0.921813000 |
| H | 7.854813000  | 1.002010000  | -1.964781000 |
| H | 8.492628000  | 2.625598000  | -2.356877000 |
| H | 8.814321000  | 1.887885000  | -0.742820000 |
| C | 7.241857000  | 4.247805000  | -0.258209000 |
| H | 7.643680000  | 4.847576000  | -1.078742000 |
| H | 8.015767000  | 4.012279000  | 0.475973000  |
| H | 6.421597000  | 4.782169000  | 0.223882000  |
| O | 6.177439000  | 1.843669000  | 0.299660000  |
| C | -1.778794000 | -1.143065000 | 6.129383000  |
| S | -1.241154000 | -0.404940000 | 4.543209000  |
| H | -1.294218000 | -2.114175000 | 6.262730000  |
| H | -1.472564000 | -0.462942000 | 6.926173000  |
| H | -2.866432000 | -1.246415000 | 6.129024000  |
| C | -1.901131000 | -1.719011000 | 3.455625000  |
| H | -1.976612000 | -1.262093000 | 2.469761000  |
| H | -1.184407000 | -2.541824000 | 3.411195000  |
| H | -2.884788000 | -2.042894000 | 3.803077000  |
| O | -2.150672000 | 0.816380000  | 4.360821000  |
| C | -5.783408000 | 0.360112000  | 0.686380000  |
| S | -6.891704000 | 1.258018000  | -0.459717000 |
| H | -5.881926000 | -0.698894000 | 0.439302000  |
| H | -4.741794000 | 0.676931000  | 0.593752000  |
| H | -6.141159000 | 0.533516000  | 1.705163000  |
| C | -6.275303000 | 2.942984000  | -0.130092000 |
| H | -6.822516000 | 3.615060000  | -0.793352000 |
| H | -5.203177000 | 3.005359000  | -0.334982000 |
| H | -6.490371000 | 3.197204000  | 0.911466000  |
| O | -6.464886000 | 0.932880000  | -1.896813000 |

$E = -3778.2733451$  a. u.

$H = -3778.2733451 + 0.778534$  (thermal correction 6-31G(d,p)) a. u.

$G = -3778.2733451 + 0.621077$  (thermal correction 6-31G(d,p)) a. u.

Transition state - 8-C bond rotation ( $\varphi_1 = 20.6^\circ$ )

|   |              |             |              |
|---|--------------|-------------|--------------|
| H | -6.146638000 | 0.757255000 | -0.680903000 |
| O | -5.996867000 | 1.710492000 | -0.453841000 |
| C | -4.662746000 | 1.972342000 | -0.419046000 |
| C | -4.233213000 | 3.172180000 | 0.165773000  |
| C | -3.711599000 | 1.074915000 | -0.923858000 |
| H | -4.974676000 | 3.858702000 | 0.560835000  |

|   |              |              |              |
|---|--------------|--------------|--------------|
| C | -2.877442000 | 3.448623000  | 0.265612000  |
| H | -4.040712000 | 0.146563000  | -1.381068000 |
| C | -2.354786000 | 1.356915000  | -0.816069000 |
| H | -2.570319000 | 4.367989000  | 0.752129000  |
| C | -1.909423000 | 2.546196000  | -0.215247000 |
| H | -1.629024000 | 0.632772000  | -1.160865000 |
| C | -0.472857000 | 2.844706000  | -0.113883000 |
| O | 0.309577000  | 1.771523000  | -0.409189000 |
| C | 0.068739000  | 4.053183000  | 0.196541000  |
| C | 1.677771000  | 1.859956000  | -0.504173000 |
| H | -0.556076000 | 4.907705000  | 0.417131000  |
| C | 1.494992000  | 4.251979000  | 0.176595000  |
| C | 2.283041000  | 3.108592000  | -0.245995000 |
| C | 2.387150000  | 0.704759000  | -0.893951000 |
| O | 2.023645000  | 5.355539000  | 0.470000000  |
| C | 3.679320000  | 3.250730000  | -0.467670000 |
| C | 3.724843000  | 0.979011000  | -1.325029000 |
| C | 1.807433000  | -0.732206000 | -0.906142000 |
| O | 4.302153000  | 4.402052000  | -0.186500000 |
| C | 4.369951000  | 2.197518000  | -1.040895000 |
| O | 4.399277000  | 0.071940000  | -2.053844000 |
| H | 1.196365000  | -0.888762000 | -1.808531000 |
| O | 2.960574000  | -1.590948000 | -0.919201000 |
| C | 0.957319000  | -1.183113000 | 0.334455000  |
| H | 3.582909000  | 5.021285000  | 0.140731000  |
| H | 5.409767000  | 2.324684000  | -1.321233000 |
| H | 5.337470000  | 0.354824000  | -2.173669000 |
| C | 2.777375000  | -2.990894000 | -1.112902000 |
| H | 1.529147000  | -0.905938000 | 1.232321000  |
| O | -0.353742000 | -0.663618000 | 0.373814000  |
| C | 0.767337000  | -2.714485000 | 0.334085000  |
| H | 3.792703000  | -3.401518000 | -1.136190000 |
| C | 2.046539000  | -3.505658000 | 0.127329000  |
| C | 2.139402000  | -3.383324000 | -2.456970000 |
| H | -0.462401000 | -0.094632000 | 1.164218000  |
| H | 0.075584000  | -2.942658000 | -0.491375000 |
| O | 0.221306000  | -3.182848000 | 1.559223000  |
| H | 2.696523000  | -3.333097000 | 0.999365000  |
| O | 1.746637000  | -4.898909000 | 0.018291000  |
| O | 2.311098000  | -4.768325000 | -2.705149000 |
| H | 2.657056000  | -2.836485000 | -3.251577000 |
| H | 1.076574000  | -3.098829000 | -2.500760000 |
| H | 1.964916000  | -5.218567000 | -1.916540000 |
| H | -0.749123000 | -3.003877000 | 1.594173000  |

|   |              |              |              |
|---|--------------|--------------|--------------|
| H | 1.059573000  | -5.050143000 | 0.688060000  |
| C | -0.411201000 | -1.470242000 | 4.304591000  |
| S | -0.422649000 | 0.346642000  | 4.136000000  |
| H | 0.202687000  | -1.931902000 | 3.526332000  |
| H | -0.052074000 | -1.718007000 | 5.307491000  |
| H | -1.438191000 | -1.815277000 | 4.171243000  |
| C | 1.385066000  | 0.604732000  | 4.198810000  |
| H | 1.752729000  | 0.327666000  | 5.190227000  |
| H | 1.563799000  | 1.665915000  | 4.017734000  |
| H | 1.869490000  | 0.006527000  | 3.423706000  |
| O | -0.865900000 | 0.689673000  | 2.709674000  |
| C | 6.402308000  | -0.925392000 | 0.315578000  |
| S | 7.570452000  | -0.731250000 | -1.079074000 |
| H | 5.441264000  | -1.230695000 | -0.104495000 |
| H | 6.789448000  | -1.691460000 | 0.992591000  |
| H | 6.288189000  | 0.032785000  | 0.828556000  |
| C | 8.963013000  | -0.041630000 | -0.118894000 |
| H | 9.308074000  | -0.782150000 | 0.607113000  |
| H | 8.635169000  | 0.875076000  | 0.376710000  |
| H | 9.760368000  | 0.184898000  | -0.828504000 |
| O | 7.064300000  | 0.426759000  | -1.946242000 |
| C | -4.932464000 | -2.991893000 | 0.969008000  |
| S | -3.367766000 | -2.056713000 | 1.094959000  |
| H | -5.644602000 | -2.413554000 | 0.372887000  |
| H | -4.696234000 | -3.928907000 | 0.461011000  |
| H | -5.319721000 | -3.203114000 | 1.968792000  |
| C | -3.991346000 | -0.694224000 | 2.134180000  |
| H | -3.148010000 | -0.023322000 | 2.313644000  |
| H | -4.787834000 | -0.166382000 | 1.606556000  |
| H | -4.356654000 | -1.118058000 | 3.073656000  |
| O | -2.453160000 | -2.891022000 | 2.004492000  |
| C | -8.998551000 | 0.442010000  | -1.606649000 |
| S | -7.721643000 | -0.676725000 | -2.283311000 |
| H | -9.466044000 | -0.079819000 | -0.770000000 |
| H | -8.523074000 | 1.361824000  | -1.257693000 |
| H | -9.744068000 | 0.647395000  | -2.378866000 |
| C | -7.062375000 | 0.456759000  | -3.555251000 |
| H | -6.226672000 | -0.054684000 | -4.035586000 |
| H | -6.715311000 | 1.371470000  | -3.069404000 |
| H | -7.842156000 | 0.667023000  | -4.291335000 |
| O | -6.633408000 | -0.787813000 | -1.202202000 |

$$E = -3778.2453912 \text{ a. u.}$$

$$H = -3778.2453912 + 0.776692 \text{ (thermal correction 6-31G(d,p)) a. u.}$$

$G = -3778.2453912 + 0.624744$  (thermal correction 6-31G(d,p)) a. u.  
 $f = 29.18i$

Transition state - 8-C bond rotation ( $\varphi_1 = -168.8^\circ$ )

|   |              |              |              |
|---|--------------|--------------|--------------|
| H | -7.472623000 | -0.984639000 | -0.685835000 |
| O | -7.402383000 | -1.797436000 | -0.127359000 |
| C | -6.111851000 | -2.166791000 | -0.020860000 |
| C | -5.792309000 | -3.257807000 | 0.808534000  |
| C | -5.077739000 | -1.496347000 | -0.698257000 |
| H | -6.596255000 | -3.771618000 | 1.325039000  |
| C | -4.470488000 | -3.645139000 | 0.979072000  |
| H | -5.328797000 | -0.666878000 | -1.350670000 |
| C | -3.761334000 | -1.885626000 | -0.513817000 |
| H | -4.245303000 | -4.468857000 | 1.649767000  |
| C | -3.425596000 | -2.959890000 | 0.331221000  |
| H | -2.966465000 | -1.350655000 | -1.017982000 |
| C | -2.015489000 | -3.304945000 | 0.531137000  |
| O | -1.209713000 | -2.281671000 | 0.151767000  |
| C | -1.499285000 | -4.469548000 | 1.016000000  |
| C | 0.152459000  | -2.317614000 | 0.224559000  |
| H | -2.142479000 | -5.294535000 | 1.292547000  |
| C | -0.075401000 | -4.641820000 | 1.119918000  |
| C | 0.743007000  | -3.514723000 | 0.684777000  |
| C | 0.887201000  | -1.178864000 | -0.195477000 |
| O | 0.451344000  | -5.704366000 | 1.544097000  |
| C | 2.156262000  | -3.623414000 | 0.692723000  |
| C | 2.283728000  | -1.408333000 | -0.282414000 |
| C | 0.262638000  | 0.199119000  | -0.560891000 |
| O | 2.760882000  | -4.739137000 | 1.123907000  |
| C | 2.907915000  | -2.566308000 | 0.206258000  |
| O | 3.071785000  | -0.485860000 | -0.888462000 |
| H | 0.285206000  | 0.340301000  | -1.653653000 |
| O | -1.091958000 | 0.130973000  | -0.101252000 |
| C | 1.037599000  | 1.432909000  | 0.047218000  |
| H | 2.007542000  | -5.356088000 | 1.391251000  |
| H | 3.988300000  | -2.627282000 | 0.198779000  |
| H | 3.983464000  | -0.851395000 | -1.050401000 |
| C | -1.919574000 | 1.278437000  | 0.012475000  |
| H | 1.487189000  | 1.133591000  | 1.001645000  |
| O | 2.033442000  | 1.912577000  | -0.841123000 |
| C | 0.142190000  | 2.654534000  | 0.298108000  |
| H | -2.806992000 | 0.909055000  | 0.538650000  |
| C | -1.205638000 | 2.299856000  | 0.894667000  |

|   |              |              |              |
|---|--------------|--------------|--------------|
| C | -2.428955000 | 1.828382000  | -1.331714000 |
| H | 2.689685000  | 1.196308000  | -0.906058000 |
| H | -0.020341000 | 3.136116000  | -0.677188000 |
| O | 0.726925000  | 3.587589000  | 1.194638000  |
| H | -1.044488000 | 1.841501000  | 1.882198000  |
| O | -1.990702000 | 3.488475000  | 1.036831000  |
| O | -3.511279000 | 2.733102000  | -1.118351000 |
| H | -2.814041000 | 0.995428000  | -1.927100000 |
| H | -1.626853000 | 2.305806000  | -1.912754000 |
| H | -3.182072000 | 3.371741000  | -0.459003000 |
| H | 1.394970000  | 4.133434000  | 0.708216000  |
| H | -1.342040000 | 4.163254000  | 1.303456000  |
| C | 3.005065000  | 2.836906000  | 3.713668000  |
| S | 3.845169000  | 1.255533000  | 3.327400000  |
| H | 2.149297000  | 2.971586000  | 3.044173000  |
| H | 2.703434000  | 2.841304000  | 4.764767000  |
| H | 3.730708000  | 3.634107000  | 3.539641000  |
| C | 2.465009000  | 0.152514000  | 3.814494000  |
| H | 2.347169000  | 0.181826000  | 4.901034000  |
| H | 2.740461000  | -0.854336000 | 3.495710000  |
| H | 1.542934000  | 0.457258000  | 3.314973000  |
| O | 3.979500000  | 1.171086000  | 1.813876000  |
| C | 5.535507000  | -4.307762000 | -1.875015000 |
| S | 5.158009000  | -2.700728000 | -2.657837000 |
| H | 4.747043000  | -4.514042000 | -1.148971000 |
| H | 5.544574000  | -5.084709000 | -2.643892000 |
| H | 6.502383000  | -4.241989000 | -1.370448000 |
| C | 6.623101000  | -2.614637000 | -3.742327000 |
| H | 6.589827000  | -3.431375000 | -4.467599000 |
| H | 7.525803000  | -2.667027000 | -3.129530000 |
| H | 6.580049000  | -1.654998000 | -4.259763000 |
| O | 5.391794000  | -1.622591000 | -1.588671000 |
| C | 4.512015000  | 6.069111000  | -1.530660000 |
| S | 3.497863000  | 4.623229000  | -1.055875000 |
| H | 5.336682000  | 5.745210000  | -2.170997000 |
| H | 3.861638000  | 6.751518000  | -2.080615000 |
| H | 4.885875000  | 6.561031000  | -0.629646000 |
| C | 4.787675000  | 3.740106000  | -0.118225000 |
| H | 4.317143000  | 2.879949000  | 0.364845000  |
| H | 5.562131000  | 3.402731000  | -0.813089000 |
| H | 5.211891000  | 4.411294000  | 0.633499000  |
| O | 2.505148000  | 5.185832000  | -0.030938000 |
| C | -6.495323000 | 2.067995000  | 0.530838000  |
| S | -7.638969000 | 1.894793000  | -0.885505000 |

|   |              |             |              |
|---|--------------|-------------|--------------|
| H | -6.711033000 | 1.242800000 | 1.212190000  |
| H | -5.459943000 | 2.030449000 | 0.182116000  |
| H | -6.703655000 | 3.019829000 | 1.027524000  |
| C | -6.843286000 | 3.132202000 | -1.966315000 |
| H | -7.319757000 | 3.047274000 | -2.944413000 |
| H | -5.770279000 | 2.933653000 | -2.030708000 |
| H | -7.028740000 | 4.126418000 | -1.550204000 |
| O | -7.364911000 | 0.533354000 | -1.539037000 |

$E = -3778.2419366$  a. u.

$H = -3778.2419366 + 0.777014$  (thermal correction 6-31G(d,p)) a. u.

$G = -3778.2419366 + 0.623632$  (thermal correction 6-31G(d,p)) a. u.

$f = 31.21i$

#### 4 Puerarin, $n = 4$ (DMSO)

a H-C<sub>7</sub> eclipsed

|   |              |              |              |
|---|--------------|--------------|--------------|
| H | -8.207588000 | 1.269601000  | 0.044598000  |
| O | -8.091052000 | 0.289890000  | -0.050968000 |
| C | -6.770905000 | -0.022832000 | -0.138403000 |
| C | -6.415673000 | -1.370702000 | -0.284468000 |
| C | -5.762735000 | 0.951242000  | -0.106991000 |
| H | -7.203616000 | -2.116551000 | -0.318161000 |
| C | -5.079869000 | -1.740910000 | -0.384152000 |
| H | -6.033880000 | 1.999475000  | -0.020587000 |
| C | -4.427960000 | 0.568870000  | -0.209477000 |
| H | -4.819817000 | -2.783532000 | -0.515492000 |
| C | -4.052819000 | -0.779407000 | -0.334452000 |
| H | -3.662438000 | 1.340194000  | -0.218218000 |
| C | -2.624367000 | -1.167360000 | -0.381707000 |
| C | -1.716257000 | -0.502848000 | 0.374241000  |
| C | -2.137262000 | -2.270575000 | -1.242849000 |
| H | -1.977467000 | 0.291220000  | 1.064085000  |
| O | -0.381069000 | -0.724272000 | 0.395922000  |
| O | -2.884615000 | -2.970997000 | -1.929667000 |
| C | -0.678075000 | -2.473723000 | -1.220756000 |
| C | 0.161482000  | -1.706898000 | -0.397047000 |
| C | -0.083489000 | -3.447614000 | -2.043757000 |
| C | 1.552750000  | -1.891137000 | -0.329982000 |
| H | -0.738332000 | -4.029815000 | -2.683093000 |
| C | 1.279582000  | -3.645753000 | -2.030121000 |
| C | 2.101832000  | -2.876150000 | -1.173903000 |
| C | 2.488213000  | -1.026034000 | 0.489722000  |

|   |              |              |              |
|---|--------------|--------------|--------------|
| H | 1.746870000  | -4.386022000 | -2.671329000 |
| O | 3.433064000  | -3.071372000 | -1.149277000 |
| H | 3.465521000  | -1.517271000 | 0.465942000  |
| O | 2.559159000  | 0.251803000  | -0.177734000 |
| C | 2.124983000  | -0.857236000 | 1.978225000  |
| H | 3.775320000  | -3.398387000 | -2.040158000 |
| C | 3.481669000  | 1.203393000  | 0.378688000  |
| H | 1.132506000  | -0.397527000 | 2.055720000  |
| O | 2.134891000  | -2.146231000 | 2.574146000  |
| C | 3.129246000  | 0.096004000  | 2.627232000  |
| H | 3.267983000  | 2.127338000  | -0.171421000 |
| C | 4.961024000  | 0.868735000  | 0.119939000  |
| C | 3.118405000  | 1.417826000  | 1.856079000  |
| H | 1.871987000  | -2.014418000 | 3.502794000  |
| H | 4.131010000  | -0.352454000 | 2.573565000  |
| O | 2.876557000  | 0.369064000  | 4.003834000  |
| O | 5.330846000  | 1.103151000  | -1.229813000 |
| H | 5.158229000  | -0.186357000 | 0.339116000  |
| H | 5.573001000  | 1.464362000  | 0.807299000  |
| H | 5.595014000  | 2.045758000  | -1.283146000 |
| H | 2.087700000  | 1.808645000  | 1.883956000  |
| O | 4.002754000  | 2.352686000  | 2.467070000  |
| H | 1.978460000  | 0.072033000  | 4.247624000  |
| H | 3.862419000  | 2.227020000  | 3.420311000  |
| S | 5.096669000  | 4.846860000  | -0.658173000 |
| O | 6.105441000  | 3.744727000  | -0.980997000 |
| C | 5.863429000  | 6.399351000  | -1.244353000 |
| H | 6.869274000  | 6.481134000  | -0.825827000 |
| H | 5.918698000  | 6.338579000  | -2.332483000 |
| H | 5.243802000  | 7.249787000  | -0.948901000 |
| C | 5.225227000  | 5.180837000  | 1.131580000  |
| H | 6.276767000  | 5.327061000  | 1.391430000  |
| H | 4.820116000  | 4.307844000  | 1.651244000  |
| H | 4.635878000  | 6.070546000  | 1.370531000  |
| S | -0.827712000 | -1.243836000 | 4.200700000  |
| O | 0.602664000  | -1.144411000 | 4.758006000  |
| C | -1.896828000 | -1.547628000 | 5.647754000  |
| H | -1.487048000 | -2.379950000 | 6.224330000  |
| H | -1.893342000 | -0.638163000 | 6.250578000  |
| H | -2.911794000 | -1.765715000 | 5.305942000  |
| C | -0.967769000 | -2.893828000 | 3.433627000  |
| H | -0.799083000 | -3.666414000 | 4.187444000  |
| H | -0.183077000 | -2.939069000 | 2.675333000  |
| H | -1.955248000 | -2.993014000 | 2.976596000  |



|   |               |              |              |
|---|---------------|--------------|--------------|
| S | -9.536115000  | 3.037597000  | -1.464469000 |
| O | -8.644031000  | 2.910047000  | -0.224210000 |
| C | -10.863505000 | 1.792273000  | -1.280108000 |
| H | -11.468508000 | 1.770127000  | -2.190080000 |
| H | -10.412637000 | 0.818126000  | -1.076196000 |
| H | -11.477021000 | 2.107139000  | -0.434259000 |
| C | -8.652876000  | 2.226118000  | -2.844972000 |
| H | -9.298343000  | 2.214004000  | -3.726868000 |
| H | -8.368971000  | 1.215638000  | -2.544462000 |
| H | -7.761187000  | 2.822083000  | -3.046131000 |
| S | 5.199874000   | -2.104230000 | -3.781668000 |
| O | 4.470093000   | -3.432469000 | -3.487175000 |
| C | 6.247975000   | -1.752318000 | -2.329722000 |
| H | 5.681376000   | -2.029158000 | -1.438732000 |
| H | 7.145808000   | -2.366172000 | -2.418938000 |
| H | 6.484039000   | -0.686623000 | -2.291583000 |
| C | 3.994097000   | -0.748572000 | -3.574123000 |
| H | 3.196917000   | -0.936699000 | -4.295875000 |
| H | 3.601330000   | -0.710053000 | -2.557519000 |
| H | 4.501157000   | 0.191711000  | -3.798803000 |

$E = -3702.9932094$  a. u.

$H = -3702.9932094 + 0.772933$  (thermal correction 6-31G(d,p)) a. u.

$G = -3702.9932094 + 0.618271$  (thermal correction 6-31G(d,p)) a. u.

Transition state - 8-C bond rotation ( $\varphi_1 = 22.7^\circ$ )

|   |             |              |              |
|---|-------------|--------------|--------------|
| H | 9.111539000 | -0.040734000 | -1.219427000 |
| O | 8.819838000 | -0.986507000 | -1.204168000 |
| C | 7.470855000 | -1.067162000 | -1.036884000 |
| C | 6.885998000 | -2.337740000 | -0.959540000 |
| C | 6.659400000 | 0.069151000  | -0.921210000 |
| H | 7.524184000 | -3.211849000 | -1.043469000 |
| C | 5.514509000 | -2.472325000 | -0.779918000 |
| H | 7.111735000 | 1.056389000  | -0.955326000 |
| C | 5.286189000 | -0.078118000 | -0.741101000 |
| H | 5.075980000 | -3.459008000 | -0.704486000 |
| C | 4.679420000 | -1.343488000 | -0.679709000 |
| H | 4.674689000 | 0.812753000  | -0.623771000 |
| C | 3.211603000 | -1.473518000 | -0.536733000 |
| C | 2.383970000 | -0.605088000 | -1.169882000 |
| C | 2.592624000 | -2.542381000 | 0.276770000  |
| H | 2.723087000 | 0.171854000  | -1.844841000 |
| O | 1.040672000 | -0.585408000 | -1.072792000 |

|   |               |              |              |
|---|---------------|--------------|--------------|
| O | 3.242610000   | -3.426923000 | 0.842368000  |
| C | 1.123658000   | -2.479684000 | 0.368758000  |
| C | 0.385364000   | -1.470265000 | -0.270258000 |
| C | 0.416252000   | -3.447202000 | 1.099088000  |
| C | -1.016210000  | -1.317347000 | -0.179531000 |
| H | 0.984554000   | -4.219639000 | 1.605473000  |
| C | -0.956425000  | -3.419211000 | 1.117192000  |
| C | -1.686662000  | -2.405050000 | 0.442966000  |
| C | -1.766576000  | -0.108064000 | -0.795040000 |
| H | -1.523983000  | -4.191193000 | 1.628940000  |
| O | -3.018235000  | -2.527799000 | 0.385061000  |
| H | -1.881994000  | -0.273594000 | -1.877991000 |
| O | -3.037742000  | -0.087686000 | -0.131598000 |
| C | -1.192169000  | 1.338906000  | -0.587910000 |
| H | -3.362397000  | -3.299324000 | 0.918830000  |
| C | -4.069461000  | 0.779923000  | -0.602575000 |
| H | -1.051314000  | 1.464765000  | 0.495684000  |
| O | 0.007030000   | 1.669431000  | -1.287626000 |
| C | -2.238738000  | 2.364081000  | -1.075624000 |
| H | -4.905770000  | 0.588228000  | 0.077601000  |
| C | -4.584535000  | 0.475774000  | -2.021028000 |
| C | -3.578133000  | 2.215303000  | -0.382113000 |
| H | -0.110014000  | 2.611058000  | -1.504053000 |
| H | -2.375817000  | 2.214467000  | -2.155151000 |
| O | -1.731057000  | 3.695964000  | -0.958856000 |
| O | -5.465586000  | -0.632908000 | -2.060751000 |
| H | -3.759641000  | 0.237930000  | -2.699552000 |
| H | -5.059832000  | 1.388748000  | -2.407365000 |
| H | -6.205901000  | -0.440840000 | -1.452362000 |
| H | -3.428407000  | 2.357259000  | 0.699164000  |
| O | -4.516857000  | 3.170026000  | -0.873459000 |
| H | -1.507112000  | 3.855452000  | -0.010426000 |
| H | -4.009850000  | 3.990338000  | -0.980309000 |
| S | -8.478148000  | 1.154443000  | -0.234254000 |
| O | -7.467279000  | 0.006338000  | -0.139530000 |
| C | -9.830848000  | 0.556302000  | -1.308488000 |
| H | -9.407969000  | 0.174525000  | -2.240855000 |
| H | -10.336449000 | -0.248091000 | -0.771656000 |
| H | -10.531933000 | 1.372405000  | -1.500927000 |
| C | -7.792749000  | 2.389373000  | -1.390513000 |
| H | -7.582549000  | 1.912619000  | -2.351225000 |
| H | -6.862907000  | 2.772836000  | -0.962133000 |
| H | -8.519472000  | 3.197833000  | -1.508259000 |
| S | 0.326445000   | 3.737524000  | 2.326509000  |

|   |              |              |              |
|---|--------------|--------------|--------------|
| O | -1.043808000 | 3.944038000  | 1.677732000  |
| C | 0.840431000  | 5.377944000  | 2.949565000  |
| H | 0.765205000  | 6.111100000  | 2.143081000  |
| H | 0.156397000  | 5.642491000  | 3.757559000  |
| H | 1.862577000  | 5.317532000  | 3.331934000  |
| C | 1.560626000  | 3.608485000  | 0.984248000  |
| H | 1.521024000  | 4.506973000  | 0.362722000  |
| H | 1.305706000  | 2.730786000  | 0.383607000  |
| H | 2.551723000  | 3.488441000  | 1.429512000  |
| S | 11.048361000 | 1.119693000  | 0.208410000  |
| O | 9.962198000  | 1.421163000  | -0.829695000 |
| C | 11.993655000 | -0.313705000 | -0.423109000 |
| H | 12.715379000 | -0.632129000 | 0.333465000  |
| H | 11.297566000 | -1.117129000 | -0.675173000 |
| H | 12.519317000 | 0.023763000  | -1.318037000 |
| C | 10.231426000 | 0.256014000  | 1.598937000  |
| H | 10.988412000 | -0.066169000 | 2.318541000  |
| H | 9.665238000  | -0.590985000 | 1.206077000  |
| H | 9.556757000  | 0.974791000  | 2.067009000  |
| S | -5.843957000 | -3.522039000 | 1.668381000  |
| O | -4.469886000 | -4.210350000 | 1.761843000  |
| C | -6.185551000 | -3.226009000 | -0.100354000 |
| H | -5.389009000 | -2.634655000 | -0.558373000 |
| H | -6.257878000 | -4.207911000 | -0.572075000 |
| H | -7.137925000 | -2.695619000 | -0.178584000 |
| C | -5.609957000 | -1.777147000 | 2.160051000  |
| H | -5.481181000 | -1.761601000 | 3.243981000  |
| H | -4.716047000 | -1.396143000 | 1.660677000  |
| H | -6.491915000 | -1.204214000 | 1.862662000  |

$E = -3702.9613848$  a. u.

$H = -3702.9613848 + 0.771807$  (thermal correction 6-31G(d,p)) a. u.

$G = -3702.9613848 + 0.619813$  (thermal correction 6-31G(d,p)) a. u.

$f = 32.63i$

Transition state - 8-C bond rotation ( $\varphi_1 = -171.4^\circ$ )

|   |             |              |              |
|---|-------------|--------------|--------------|
| H | 8.783343000 | -0.062504000 | -0.860416000 |
| O | 8.385709000 | -0.712942000 | -1.491966000 |
| C | 7.042796000 | -0.806475000 | -1.290625000 |
| C | 6.312569000 | -1.698971000 | -2.086239000 |
| C | 6.375514000 | -0.061700000 | -0.308237000 |
| H | 6.839061000 | -2.276998000 | -2.839307000 |
| C | 4.940387000 | -1.837178000 | -1.913210000 |

|   |              |              |              |
|---|--------------|--------------|--------------|
| H | 6.940150000  | 0.614193000  | 0.327591000  |
| C | 5.001202000  | -0.210579000 | -0.141645000 |
| H | 4.389982000  | -2.541443000 | -2.523744000 |
| C | 4.249709000  | -1.085586000 | -0.944038000 |
| H | 4.507465000  | 0.350213000  | 0.647485000  |
| C | 2.781692000  | -1.187917000 | -0.782409000 |
| C | 2.046419000  | -0.090744000 | -0.472563000 |
| C | 2.055943000  | -2.458314000 | -0.941452000 |
| H | 2.468710000  | 0.903103000  | -0.378710000 |
| O | 0.720230000  | -0.051507000 | -0.248674000 |
| O | 2.594994000  | -3.518072000 | -1.274374000 |
| C | 0.604792000  | -2.390276000 | -0.659382000 |
| C | -0.042674000 | -1.183303000 | -0.323674000 |
| C | -0.140695000 | -3.575591000 | -0.706007000 |
| C | -1.438223000 | -1.100431000 | -0.050268000 |
| H | 0.382501000  | -4.489252000 | -0.965287000 |
| C | -1.485422000 | -3.550807000 | -0.424076000 |
| C | -2.120962000 | -2.334808000 | -0.096169000 |
| C | -2.181089000 | 0.189692000  | 0.402209000  |
| H | -2.084735000 | -4.456279000 | -0.441800000 |
| O | -3.446472000 | -2.356121000 | 0.185042000  |
| H | -2.361916000 | 0.100710000  | 1.486145000  |
| O | -1.295983000 | 1.269046000  | 0.148707000  |
| C | -3.612545000 | 0.388746000  | -0.227430000 |
| H | -3.751645000 | -3.255408000 | 0.493640000  |
| C | -1.791028000 | 2.604534000  | 0.183379000  |
| H | -3.692873000 | -0.243001000 | -1.120234000 |
| O | -4.573280000 | 0.010274000  | 0.762418000  |
| C | -3.968820000 | 1.833762000  | -0.676294000 |
| H | -0.906651000 | 3.214660000  | -0.034893000 |
| C | -2.331694000 | 3.052219000  | 1.552241000  |
| C | -2.775815000 | 2.714625000  | -0.979164000 |
| H | -5.426864000 | -0.071817000 | 0.298540000  |
| H | -4.502171000 | 2.288994000  | 0.169624000  |
| O | -4.803352000 | 1.854442000  | -1.833287000 |
| O | -1.306991000 | 3.189744000  | 2.512807000  |
| H | -3.044969000 | 2.313529000  | 1.936701000  |
| H | -2.883882000 | 3.990818000  | 1.403775000  |
| H | -0.924700000 | 4.078301000  | 2.376082000  |
| H | -2.267289000 | 2.340811000  | -1.880463000 |
| O | -3.196161000 | 4.064356000  | -1.175592000 |
| H | -5.634414000 | 1.394519000  | -1.604778000 |
| H | -3.979969000 | 4.002380000  | -1.742642000 |
| S | 0.018533000  | 6.169291000  | 0.493283000  |

|   |              |              |              |
|---|--------------|--------------|--------------|
| O | -0.636080000 | 5.836664000  | 1.830763000  |
| C | 0.896159000  | 7.754433000  | 0.747854000  |
| H | 0.203105000  | 8.484108000  | 1.173449000  |
| H | 1.707462000  | 7.560625000  | 1.451483000  |
| H | 1.303273000  | 8.106667000  | -0.203361000 |
| C | -1.295337000 | 6.806950000  | -0.604240000 |
| H | -1.854439000 | 7.583689000  | -0.076063000 |
| H | -1.949807000 | 5.965443000  | -0.848210000 |
| H | -0.837762000 | 7.205135000  | -1.514284000 |
| S | -6.885955000 | -1.055276000 | -2.178057000 |
| O | -6.787767000 | 0.001892000  | -1.063399000 |
| C | -8.667276000 | -1.417986000 | -2.340712000 |
| H | -9.077456000 | -1.652693000 | -1.355966000 |
| H | -9.142906000 | -0.520169000 | -2.738563000 |
| H | -8.805203000 | -2.251365000 | -3.034169000 |
| C | -6.373987000 | -2.638843000 | -1.438080000 |
| H | -6.985399000 | -2.850995000 | -0.558101000 |
| H | -5.327899000 | -2.531282000 | -1.142691000 |
| H | -6.478421000 | -3.430165000 | -2.184850000 |
| S | 10.667213000 | -0.416819000 | 1.019427000  |
| O | 9.731641000  | 0.633280000  | 0.411408000  |
| C | 11.519481000 | -1.230646000 | -0.380118000 |
| H | 12.118797000 | -2.063567000 | -0.003680000 |
| H | 10.772877000 | -1.569003000 | -1.102518000 |
| H | 12.169665000 | -0.480870000 | -0.834134000 |
| C | 9.630089000  | -1.841269000 | 1.510186000  |
| H | 10.274175000 | -2.645190000 | 1.875557000  |
| H | 9.034912000  | -2.164824000 | 0.654079000  |
| H | 8.975670000  | -1.496212000 | 2.312312000  |
| S | -4.606162000 | -4.090343000 | 2.850681000  |
| O | -4.470256000 | -4.455799000 | 1.361746000  |
| C | -5.404969000 | -2.449931000 | 2.936645000  |
| H | -4.901238000 | -1.740874000 | 2.270622000  |
| H | -6.442360000 | -2.590396000 | 2.625696000  |
| H | -5.383261000 | -2.107346000 | 3.974756000  |
| C | -2.951436000 | -3.583001000 | 3.435436000  |
| H | -2.298089000 | -4.450867000 | 3.332272000  |
| H | -2.577467000 | -2.755479000 | 2.830179000  |
| H | -3.023951000 | -3.295234000 | 4.487223000  |

$E = -3702.9648026$  a. u.

$H = -3702.9648026 + 0.771461$  (thermal correction 6-31G(d,p)) a. u.

$G = -3702.9648026 + 0.617405$  (thermal correction 6-31G(d,p)) a. u.

$f = 32.85i$

## 5 Prunetin-8-C-glucoside, *n* = 3 (DMSO)

a H-C<sub>7</sub> eclipsed

|   |              |              |              |
|---|--------------|--------------|--------------|
| H | -7.844602000 | -1.530509000 | 0.185672000  |
| O | -7.512781000 | -1.282792000 | -0.715900000 |
| C | -6.254400000 | -0.777960000 | -0.635741000 |
| C | -5.628196000 | -0.365395000 | -1.820199000 |
| C | -5.574267000 | -0.640007000 | 0.582867000  |
| H | -6.165430000 | -0.469930000 | -2.757503000 |
| C | -4.344795000 | 0.165666000  | -1.789856000 |
| H | -6.064420000 | -0.935660000 | 1.505878000  |
| C | -4.289367000 | -0.104730000 | 0.601407000  |
| H | -3.878668000 | 0.490950000  | -2.711630000 |
| C | -3.641243000 | 0.297257000  | -0.578165000 |
| H | -3.789932000 | 0.026064000  | 1.557671000  |
| C | -2.252887000 | 0.810237000  | -0.537429000 |
| C | -1.340264000 | 0.253317000  | 0.299588000  |
| C | -1.801279000 | 1.928107000  | -1.376179000 |
| H | -1.554893000 | -0.599843000 | 0.931919000  |
| O | -0.064743000 | 0.658221000  | 0.465769000  |
| O | -2.548461000 | 2.490811000  | -2.211139000 |
| C | -0.424810000 | 2.353419000  | -1.185018000 |
| C | 0.424659000  | 1.712979000  | -0.260255000 |
| C | 0.108463000  | 3.437747000  | -1.935938000 |
| C | 1.754621000  | 2.076465000  | -0.040930000 |
| O | -0.644443000 | 4.086242000  | -2.830811000 |
| C | 1.430135000  | 3.831924000  | -1.741561000 |
| C | 2.233470000  | 3.160676000  | -0.810891000 |
| C | 2.647470000  | 1.374392000  | 0.957571000  |
| H | -1.539133000 | 3.638469000  | -2.807622000 |
| H | 1.801812000  | 4.659229000  | -2.330126000 |
| O | 3.527776000  | 3.512625000  | -0.587967000 |
| H | 3.611486000  | 1.893081000  | 0.949705000  |
| O | 2.035692000  | 1.487277000  | 2.255928000  |
| C | 2.933540000  | -0.105154000 | 0.606724000  |
| C | 4.079184000  | 4.614425000  | -1.296316000 |
| C | 2.787901000  | 0.954075000  | 3.351090000  |
| H | 1.984290000  | -0.651505000 | 0.566652000  |
| O | 3.599409000  | -0.166181000 | -0.643887000 |
| C | 3.790945000  | -0.710593000 | 1.719892000  |
| H | 5.105464000  | 4.710411000  | -0.939825000 |
| H | 4.085605000  | 4.434733000  | -2.377825000 |

|   |               |              |              |
|---|---------------|--------------|--------------|
| H | 3.533958000   | 5.541954000  | -1.086252000 |
| H | 2.110839000   | 1.013348000  | 4.209758000  |
| C | 4.017567000   | 1.806666000  | 3.718814000  |
| C | 3.101291000   | -0.526318000 | 3.070455000  |
| H | 3.134117000   | -0.826957000 | -1.202375000 |
| H | 4.758303000   | -0.187249000 | 1.729485000  |
| O | 4.022168000   | -2.107127000 | 1.568108000  |
| O | 4.504721000   | 1.480196000  | 5.007805000  |
| H | 3.703290000   | 2.855345000  | 3.739883000  |
| H | 4.808755000   | 1.719217000  | 2.957063000  |
| H | 4.636612000   | 0.517461000  | 4.996771000  |
| H | 2.144270000   | -1.070774000 | 3.031281000  |
| O | 3.918631000   | -1.069688000 | 4.108105000  |
| H | 4.834250000   | -2.217723000 | 1.013478000  |
| H | 4.306178000   | -1.868301000 | 3.712184000  |
| S | 6.137037000   | -2.032788000 | -1.400975000 |
| C | 7.640085000   | -2.784381000 | -2.119540000 |
| H | 7.676171000   | -2.579501000 | -3.192566000 |
| H | 8.522301000   | -2.385139000 | -1.613770000 |
| H | 7.572984000   | -3.860179000 | -1.949023000 |
| C | 6.575775000   | -0.290527000 | -1.714194000 |
| H | 6.680773000   | -0.136284000 | -2.791611000 |
| H | 7.505402000   | -0.054668000 | -1.190249000 |
| H | 5.739507000   | 0.293348000  | -1.327260000 |
| O | 6.279494000   | -2.264988000 | 0.108360000  |
| S | 1.273425000   | -2.974723000 | -1.235745000 |
| C | 2.143720000   | -4.212915000 | -0.217986000 |
| H | 2.815068000   | -4.796561000 | -0.852977000 |
| H | 2.716311000   | -3.649326000 | 0.525004000  |
| H | 1.406885000   | -4.856890000 | 0.270002000  |
| C | 0.549309000   | -4.122618000 | -2.458129000 |
| H | 1.354076000   | -4.671340000 | -2.952952000 |
| H | 0.008423000   | -3.517084000 | -3.187104000 |
| H | -0.140574000  | -4.804404000 | -1.954493000 |
| O | 2.342491000   | -2.188723000 | -1.998787000 |
| S | -10.030386000 | -0.778456000 | 1.522137000  |
| C | -10.834791000 | -1.248341000 | -0.052016000 |
| H | -10.105060000 | -1.174565000 | -0.861830000 |
| H | -11.694290000 | -0.596566000 | -0.228232000 |
| H | -11.169360000 | -2.281106000 | 0.059621000  |
| C | -9.513806000  | 0.902734000  | 1.020434000  |
| H | -10.402065000 | 1.514078000  | 0.842078000  |
| H | -8.890677000  | 0.833296000  | 0.126518000  |
| H | -8.937616000  | 1.318835000  | 1.848506000  |

O -8.756179000 -1.624521000 1.629219000

$E = -3264.2603266$  a. u.

$H = -3264.2603266 + 0.719958$  (thermal correction 6-31G(d,p)) a. u.

$G = -3264.2603266 + 0.575831$  (thermal correction 6-31G(d,p)) a. u.

Transition state - 8-C bond rotation ( $\varphi_1 = 15.0^\circ$ )

|   |              |              |              |
|---|--------------|--------------|--------------|
| H | -7.169526000 | -0.428804000 | -0.820501000 |
| O | -6.984779000 | 0.502340000  | -1.106233000 |
| C | -5.658000000 | 0.782114000  | -1.008127000 |
| C | -5.223455000 | 2.069452000  | -1.351128000 |
| C | -4.722010000 | -0.163104000 | -0.566443000 |
| H | -5.957092000 | 2.795742000  | -1.686493000 |
| C | -3.877549000 | 2.404261000  | -1.264609000 |
| H | -5.058510000 | -1.155352000 | -0.278423000 |
| C | -3.375153000 | 0.181078000  | -0.481129000 |
| H | -3.556570000 | 3.406058000  | -1.521253000 |
| C | -2.922425000 | 1.463291000  | -0.838757000 |
| H | -2.661976000 | -0.551043000 | -0.110353000 |
| C | -1.478570000 | 1.782358000  | -0.775947000 |
| C | -0.557699000 | 0.848206000  | -1.123996000 |
| C | -0.966029000 | 3.076794000  | -0.322293000 |
| H | -0.813101000 | -0.122896000 | -1.527315000 |
| O | 0.776077000  | 0.979839000  | -1.015404000 |
| O | -1.717436000 | 4.042957000  | -0.042897000 |
| C | 0.479040000  | 3.186459000  | -0.194521000 |
| C | 1.339892000  | 2.106222000  | -0.486212000 |
| C | 1.067867000  | 4.395237000  | 0.253974000  |
| C | 2.733567000  | 2.097147000  | -0.306151000 |
| O | 0.319072000  | 5.455106000  | 0.577679000  |
| C | 2.450627000  | 4.481001000  | 0.323386000  |
| C | 3.275243000  | 3.385902000  | 0.012850000  |
| C | 3.584358000  | 0.805050000  | -0.487626000 |
| H | -0.627937000 | 5.170792000  | 0.419181000  |
| H | 2.873282000  | 5.434215000  | 0.605988000  |
| O | 4.617351000  | 3.558768000  | -0.019801000 |
| H | 3.671055000  | 0.574433000  | -1.562296000 |
| O | 4.854354000  | 1.135095000  | 0.073149000  |
| C | 3.047146000  | -0.504686000 | 0.212005000  |
| C | 5.176800000  | 4.829231000  | 0.276966000  |
| C | 5.913589000  | 0.184653000  | 0.092788000  |
| H | 2.656498000  | -0.221052000 | 1.199325000  |
| O | 2.070582000  | -1.200425000 | -0.547700000 |



|   |               |              |              |
|---|---------------|--------------|--------------|
| C | 4.166983000   | -1.542865000 | 0.420225000  |
| H | 6.254407000   | 4.700922000  | 0.166537000  |
| H | 4.830457000   | 5.602315000  | -0.419778000 |
| H | 4.955332000   | 5.143794000  | 1.303999000  |
| H | 6.740575000   | 0.711411000  | 0.580827000  |
| C | 6.430999000   | -0.221680000 | -1.298310000 |
| C | 5.454977000   | -0.973030000 | 0.980906000  |
| H | 1.218486000   | -1.191586000 | -0.065695000 |
| H | 4.383704000   | -1.974416000 | -0.566147000 |
| O | 3.748946000   | -2.588982000 | 1.292487000  |
| O | 7.672339000   | -0.897127000 | -1.201552000 |
| H | 6.597153000   | 0.692873000  | -1.877429000 |
| H | 5.687941000   | -0.822070000 | -1.847321000 |
| H | 7.537087000   | -1.603574000 | -0.547635000 |
| H | 5.260515000   | -0.572253000 | 1.987510000  |
| O | 6.447641000   | -1.998146000 | 1.048942000  |
| H | 3.374585000   | -3.310215000 | 0.730319000  |
| H | 5.962238000   | -2.784068000 | 1.349922000  |
| S | 1.535936000   | -4.378293000 | -1.048391000 |
| C | 1.149140000   | -6.043956000 | -1.693739000 |
| H | 0.233668000   | -6.003808000 | -2.289521000 |
| H | 1.990531000   | -6.403783000 | -2.290452000 |
| H | 1.003054000   | -6.696484000 | -0.831331000 |
| C | 1.828051000   | -3.569439000 | -2.657322000 |
| H | 0.915001000   | -3.622313000 | -3.256537000 |
| H | 2.658763000   | -4.067995000 | -3.162953000 |
| H | 2.072512000   | -2.532278000 | -2.424012000 |
| O | 2.901115000   | -4.537648000 | -0.369675000 |
| S | -0.023973000  | -1.145981000 | 2.451217000  |
| C | 0.883797000   | -2.564027000 | 3.152841000  |
| H | 0.353873000   | -3.488074000 | 2.908766000  |
| H | 1.875653000   | -2.562175000 | 2.689617000  |
| H | 0.968285000   | -2.433823000 | 4.235175000  |
| C | -1.642838000  | -1.463388000 | 3.231660000  |
| H | -1.983372000  | -2.464627000 | 2.957638000  |
| H | -2.335270000  | -0.714600000 | 2.843070000  |
| H | -1.550474000  | -1.361872000 | 4.315908000  |
| O | -0.226333000  | -1.450192000 | 0.959839000  |
| S | -9.257138000  | -1.377503000 | 0.522302000  |
| C | -10.181931000 | -0.503204000 | -0.791898000 |
| H | -9.552819000  | 0.285067000  | -1.212141000 |
| H | -11.106115000 | -0.095522000 | -0.374278000 |
| H | -10.417244000 | -1.243976000 | -1.558060000 |
| C | -8.926071000  | 0.080286000  | 1.576773000  |

|   |              |              |              |
|---|--------------|--------------|--------------|
| H | -9.873420000 | 0.485113000  | 1.941546000  |
| H | -8.370021000 | 0.817688000  | 0.993508000  |
| H | -8.323467000 | -0.266979000 | 2.417840000  |
| O | -7.916053000 | -1.795651000 | -0.090807000 |

$E = -3264.2318614$  a. u.

$H = -3264.2318614 + 0.718417$  (thermal correction 6-31G(d,p)) a. u.

$G = -3264.2318614 + 0.578095$  (thermal correction 6-31G(d,p)) a. u.

$f = 35.45i$

Transition state - 8-C bond rotation ( $\varphi_1 = -164.7^\circ$ )

|   |              |              |              |
|---|--------------|--------------|--------------|
| H | -9.084880000 | 0.888741000  | 0.947194000  |
| O | -8.704138000 | 0.073504000  | 1.362752000  |
| C | -7.386247000 | -0.047217000 | 1.054483000  |
| C | -6.690028000 | -1.159442000 | 1.547320000  |
| C | -6.710551000 | 0.883855000  | 0.252739000  |
| H | -7.222895000 | -1.876496000 | 2.163701000  |
| C | -5.343661000 | -1.334320000 | 1.252970000  |
| H | -7.249996000 | 1.737174000  | -0.147715000 |
| C | -5.362048000 | 0.696461000  | -0.038228000 |
| H | -4.821616000 | -2.203437000 | 1.633129000  |
| C | -4.645848000 | -0.404001000 | 0.460558000  |
| H | -4.862819000 | 1.411054000  | -0.687111000 |
| C | -3.200168000 | -0.553484000 | 0.179735000  |
| C | -2.381572000 | 0.528442000  | 0.146649000  |
| C | -2.577872000 | -1.847286000 | -0.097761000 |
| H | -2.717115000 | 1.537044000  | 0.358588000  |
| O | -1.069259000 | 0.522225000  | -0.137434000 |
| O | -3.227862000 | -2.922176000 | -0.076771000 |
| C | -1.156731000 | -1.832221000 | -0.416136000 |
| C | -0.392884000 | -0.637936000 | -0.403091000 |
| C | -0.516623000 | -3.044060000 | -0.790295000 |
| C | 0.995696000  | -0.583575000 | -0.672225000 |
| O | -1.174628000 | -4.206490000 | -0.798785000 |
| C | 0.809838000  | -3.006646000 | -1.195001000 |
| C | 1.526747000  | -1.804681000 | -1.171896000 |
| C | 1.862546000  | 0.697288000  | -0.504780000 |
| H | -2.111321000 | -3.983271000 | -0.511202000 |
| H | 1.260030000  | -3.926498000 | -1.539883000 |
| O | 2.786346000  | -1.750334000 | -1.661969000 |
| H | 2.021163000  | 1.156643000  | -1.494288000 |
| O | 1.079718000  | 1.547648000  | 0.339789000  |
| C | 3.282123000  | 0.536890000  | 0.161111000  |

|   |               |              |              |
|---|---------------|--------------|--------------|
| C | 3.414994000   | -2.930833000 | -2.147160000 |
| C | 1.532988000   | 2.857241000  | 0.667633000  |
| H | 3.179025000   | -0.140860000 | 1.018003000  |
| O | 4.311190000   | 0.103881000  | -0.714318000 |
| C | 3.815177000   | 1.886418000  | 0.679371000  |
| H | 4.408581000   | -2.617110000 | -2.467108000 |
| H | 3.521653000   | -3.680803000 | -1.357636000 |
| H | 2.867527000   | -3.352410000 | -2.998159000 |
| H | 0.744532000   | 3.265523000  | 1.308955000  |
| C | 1.640678000   | 3.811989000  | -0.534741000 |
| C | 2.815040000   | 2.690785000  | 1.484631000  |
| H | 4.521557000   | -0.828423000 | -0.508975000 |
| H | 4.089280000   | 2.477558000  | -0.208147000 |
| O | 4.956827000   | 1.712325000  | 1.505801000  |
| O | 1.783854000   | 5.154411000  | -0.107170000 |
| H | 0.708603000   | 3.744207000  | -1.105903000 |
| H | 2.457285000   | 3.516280000  | -1.212762000 |
| H | 2.512900000   | 5.147916000  | 0.536049000  |
| H | 2.566912000   | 2.130685000  | 2.398533000  |
| O | 3.379219000   | 3.958423000  | 1.829367000  |
| H | 5.736483000   | 1.551689000  | 0.932537000  |
| H | 4.300063000   | 3.756035000  | 2.063412000  |
| S | 7.467186000   | 0.681179000  | -1.285330000 |
| C | 9.110958000   | 1.221818000  | -1.876651000 |
| H | 9.271841000   | 0.861613000  | -2.895960000 |
| H | 9.170916000   | 2.311624000  | -1.830940000 |
| H | 9.852300000   | 0.783128000  | -1.206695000 |
| C | 6.467673000   | 1.636423000  | -2.476130000 |
| H | 6.730908000   | 1.327812000  | -3.491400000 |
| H | 6.658124000   | 2.702434000  | -2.328603000 |
| H | 5.430115000   | 1.383219000  | -2.255304000 |
| O | 7.313350000   | 1.350277000  | 0.085929000  |
| S | 5.444522000   | -2.006369000 | 1.851404000  |
| C | 7.149953000   | -1.407532000 | 2.095343000  |
| H | 7.849620000   | -2.112833000 | 1.639196000  |
| H | 7.218995000   | -0.431645000 | 1.606925000  |
| H | 7.339704000   | -1.306319000 | 3.167310000  |
| C | 5.662202000   | -3.656616000 | 2.606971000  |
| H | 6.445942000   | -4.197868000 | 2.071580000  |
| H | 4.711598000   | -4.182908000 | 2.505594000  |
| H | 5.913979000   | -3.545521000 | 3.664714000  |
| O | 5.269537000   | -2.270731000 | 0.351975000  |
| S | -11.073907000 | 1.174127000  | -0.828682000 |
| C | -11.894687000 | 0.036983000  | 0.346489000  |

|   |               |              |              |
|---|---------------|--------------|--------------|
| H | -11.130174000 | -0.530305000 | 0.882771000  |
| H | -12.572653000 | -0.622145000 | -0.201656000 |
| H | -12.461684000 | 0.656417000  | 1.043498000  |
| C | -10.174080000 | -0.101839000 | -1.781653000 |
| H | -10.895114000 | -0.737535000 | -2.301900000 |
| H | -9.549215000  | -0.683414000 | -1.100884000 |
| H | -9.550484000  | 0.422897000  | -2.507250000 |
| O | -10.027422000 | 1.953248000  | -0.024417000 |

$E = -3264.2314961$  a. u.

$H = -3264.2314961 + 0.718163$  (thermal correction 6-31G(d,p)) a. u.

$G = -3264.2314961 + 0.577767$  (thermal correction 6-31G(d,p)) a. u.

$f = 32.45i$
